# Supplementary material for: Characteristics and Classification of Technology Sector Companies in Digital Health for Diabetes
Source: MDPI journal article supplement (doi:10.3390/su13094839), 2021-04-26
Supplement: s1 [file s1]

Archive with 1 entries (1 files):
- sustainability-1183326-supplementary.pdf
