# Supplementary material for: Characteristics and Classification of Technology Sector Companies in Digital Health for Diabetes
Source: MDPI journal article supplement (doi:10.3390/su13094839), 2021-04-26
Supplement: s1 [file s1 › sustainability-1183326-supplementary.pdf]

## Appendix

Table A1: List of companies in diabetes digital health

| #  | Company name           | Year of establishment | Country of headquarter | Company homepage                                                                                    | Sector      | Industry                    | Accessed   |
|----|------------------------|-----------------------|------------------------|-----------------------------------------------------------------------------------------------------|-------------|-----------------------------|------------|
| 1  | LifeScan               | 1981                  | USA                    | <a href="https://www.lifescan.com">https://www.lifescan.com</a>                                     | Health Care | Medical Equipment & Devices | 2020/12/21 |
| 2  | Hoffmann-La Roche      | 1896                  | Switzerland            | <a href="https://www.roche.com">https://www.roche.com</a>                                           | Health Care | Biotech & Pharma            | 2020/12/21 |
| 3  | Medtronic              | 1949                  | USA                    | <a href="https://www.medtronic.com/in-en/index.html">https://www.medtronic.com/in-en/index.html</a> | Health Care | Medical Equipment & Devices | 2020/12/21 |
| 4  | Ascensia Diabetes Care | 2016                  | Switzerland            | <a href="https://www.ascensia.com">https://www.ascensia.com</a>                                     | Other       | Other                       | 2020/12/24 |
| 5  | Tandem Diabetes Care   | 2006                  | USA                    | <a href="https://www.tandemdiabetes.com">https://www.tandemdiabetes.com</a>                         | Health Care | Medical Equipment & Devices | 2020/12/21 |
| 6  | Dexcom Inc.            | 1999                  | USA                    | <a href="https://www.dexcom.com/en-IN">https://www.dexcom.com/en-IN</a>                             | Health Care | Medical Equipment & Devices | 2020/12/21 |
| 7  | SocialDiabetes         | 2012                  | Spain                  | <a href="https://www.socialdiabetes.com">https://www.socialdiabetes.com</a>                         | Health Care | Biotech & Pharma            | 2020/12/21 |
| 8  | One Drop               | 2014                  | USA                    | <a href="https://onedrop.today">https://onedrop.today</a>                                           | Technology  | Software & Tech Services    | 2020/12/21 |
| 9  | Health2Sync            | 2013                  | Taiwan                 | <a href="https://www.health2sync.com/ja/">https://www.health2sync.com/ja/</a>                       | Technology  | Software & Tech Services    | 2020/12/21 |
| 10 | Dottli                 | 2009                  | Finland                | <a href="https://dottli.com">https://dottli.com</a>                                                 | Other       | Other                       | 2020/12/24 |

| #  | Company name | Year of establishment | Country of headquarter | Company homepage                                                      | Sector         | Industry                    | Accessed   |
|----|--------------|-----------------------|------------------------|-----------------------------------------------------------------------|----------------|-----------------------------|------------|
| 11 | Abbott       | 1888                  | USA                    | <a href="https://www.abbott.com">https://www.abbott.com</a>           | Health Care    | Medical Equipment & Devices | 2020/12/21 |
| 12 | Novo Nordisk | 1923                  | Denmark                | <a href="https://www.novonordisk.com">https://www.novonordisk.com</a> | Health Care    | Biotech & Pharma            | 2020/12/21 |
| 13 | Insulet      | 2000                  | USA                    | <a href="http://www.insulet.com/">http://www.insulet.com/</a>         | Health Care    | Medical Equipment & Devices | 2020/12/21 |
| 14 | Diabeloop    | 2015                  | France                 | <a href="https://www.diabeloop.com">https://www.diabeloop.com</a>     | Health Care    | Medical Equipment & Devices | 2020/12/21 |
| 15 | Virta Health | 2014                  | USA                    | <a href="https://www.virtahealth.com">https://www.virtahealth.com</a> | Communications | Media                       | 2020/12/21 |
| 16 | Nemaura      | 2013                  | UK                     | <a href="https://nemauramedical.com">https://nemauramedical.com</a>   | Health Care    | Medical Equipment & Devices | 2020/12/21 |
| 17 | mySugr       | 2012                  | Austria                | <a href="https://www.mysugr.com/en">https://www.mysugr.com/en</a>     | Technology     | Software & Tech Services    | 2020/12/21 |
| 18 | Livongo      | 2008                  | USA                    | <a href="https://www2.livongo.com">https://www2.livongo.com</a>       | Health Care    | Biotech & Pharma            | 2020/12/21 |
| 19 | CellNovo     | 2002                  | France                 | <a href="https://www.cellnovo.com/">https://www.cellnovo.com/</a>     | Health Care    | Medical Equipment & Devices | 2020/12/21 |
| 20 | DarioHealth  | 2011                  | Israel                 | <a href="https://www.dariohealth.com">https://www.dariohealth.com</a> | Technology     | Software & Tech Services    | 2020/12/21 |
| 21 | Senseonics   | 1996                  | USA                    | <a href="https://www.senseonics.com">https://www.senseonics.com</a>   | Health Care    | Medical Equipment & Devices | 2020/12/21 |

| #  | Company name       | Year of establishment | Country of headquarter | Company homepage                                                                        | Sector      | Industry                       | Accessed   |
|----|--------------------|-----------------------|------------------------|-----------------------------------------------------------------------------------------|-------------|--------------------------------|------------|
| 22 | Bigfoot Biomedical | 2014                  | USA                    | <a href="https://www.bigfootbiomedical.com">https://www.bigfootbiomedical.com</a>       | Health Care | Medical Equipment & Devices    | 2020/12/21 |
| 23 | fitbit             | 2007                  | USA                    | <a href="https://www.fitbit.com/us/home">https://www.fitbit.com/us/home</a>             | Technology  | Tech Hardware & Semiconductors | 2020/12/21 |
| 24 | GARMIN             | 1989                  | USA                    | <a href="https://www.garmin.com/en-US/">https://www.garmin.com/en-US/</a>               | Technology  | Tech Hardware & Semiconductors | 2020/12/21 |
| 25 | Samsung            | 1938                  | South Korea            | <a href="https://www.samsung.com/us/">https://www.samsung.com/us/</a>                   | Technology  | Tech Hardware & Semiconductors | 2020/12/21 |
| 26 | IBM Watson Health  | 1911                  | USA                    | <a href="https://www.ibm.com/watson-health">https://www.ibm.com/watson-health</a>       | Technology  | Software & Tech Services       | 2020/12/21 |
| 27 | Verily             | 2015                  | USA                    | <a href="https://verily.com">https://verily.com</a>                                     | Health Care | Biotech & Pharma               | 2020/12/21 |
| 28 | GlucoIQ            | 2015                  | USA                    | <a href="http://glucoiq.com">http://glucoiq.com</a>                                     | Other       | Other                          | 2020/12/24 |
| 29 | Welldoc            | 2005                  | USA                    | <a href="https://www.welldoc.com">https://www.welldoc.com</a>                           | Technology  | Software & Tech Services       | 2020/12/21 |
| 30 | Chino.io           | 2014                  | Italy                  | <a href="https://www.chino.io">https://www.chino.io</a>                                 | Other       | Other                          | 2020/12/24 |
| 31 | NetApp             | 1992                  | USA                    | <a href="https://www.netapp.com/us/index.aspx">https://www.netapp.com/us/index.aspx</a> | Technology  | Tech Hardware & Semiconductors | 2020/12/21 |
| 32 | TrueVault          | 2013                  | USA                    | <a href="https://www.truevault.com">https://www.truevault.com</a>                       | Technology  | Software & Tech Services       | 2020/12/21 |
| 33 | Iron Mountain      | 1951                  | USA                    | <a href="https://www.ironmountain.com">https://www.ironmountain.com</a>                 | Real Estate | Real Estate                    | 2020/12/21 |

| #  | Company name    | Year of establishment | Country of headquarter | Company homepage                                                              | Sector         | Industry                       | Accessed   |
|----|-----------------|-----------------------|------------------------|-------------------------------------------------------------------------------|----------------|--------------------------------|------------|
| 34 | Azumio          | 2011                  | USA                    | <a href="http://www.azumio.com/">http://www.azumio.com/</a>                   | Technology     | Software & Tech Services       | 2020/12/21 |
| 35 | @Point of Care  | 2012                  | USA                    | <a href="http://atpointofcare.com">http://atpointofcare.com</a>               | Other          | Other                          | 2020/12/24 |
| 36 | myDiabeticAlert | 2014                  | USA                    | <a href="https://www.mydiabeticalert.com">https://www.mydiabeticalert.com</a> | Other          | Other                          | 2020/12/24 |
| 37 | Glooko          | 2010                  | USA                    | <a href="https://www.glooko.com">https://www.glooko.com</a>                   | Technology     | Software & Tech Services       | 2020/12/21 |
| 38 | Apple           | 1976                  | USA                    | <a href="http://www.apple.com/">http://www.apple.com/</a>                     | Technology     | Tech Hardware & Semiconductors | 2020/12/21 |
| 39 | Google          | 1998                  | USA                    | <a href="http://www.google.com/">http://www.google.com/</a>                   | Communications | Media                          | 2020/12/21 |
| 40 | Validic         | 2010                  | USA                    | <a href="https://validic.com">https://validic.com</a>                         | Communications | Telecommunications             | 2020/12/21 |
| 41 | Cecelia Health  | 2009                  | USA                    | <a href="https://www.ceceliahealth.com">https://www.ceceliahealth.com</a>     | Technology     | Software & Tech Services       | 2020/12/21 |
| 42 | Noom            | 2008                  | USA                    | <a href="https://www.noom.com/#/">https://www.noom.com/#/</a>                 | Technology     | Software & Tech Services       | 2020/12/21 |
| 43 | Omada Health    | 2011                  | USA                    | <a href="https://www.omadahealth.com">https://www.omadahealth.com</a>         | Technology     | Software & Tech Services       | 2020/12/21 |
| 44 | Vida Health     | 2014                  | USA                    | <a href="https://www.vida.com">https://www.vida.com</a>                       | Technology     | Software & Tech Services       | 2020/12/21 |
| 45 | Sweetch         | 2013                  | Israel                 | <a href="https://sweetch.com">https://sweetch.com</a>                         | Technology     | Software & Tech Services       | 2020/12/21 |

| #  | Company name                | Year of establishment | Country of headquarter | Company homepage                                                                    | Sector           | Industry                     | Accessed   |
|----|-----------------------------|-----------------------|------------------------|-------------------------------------------------------------------------------------|------------------|------------------------------|------------|
| 46 | DreaMed Diabetes            | 2014                  | Israel                 | <a href="https://dreamed-diabetes.com">https://dreamed-diabetes.com</a>             | Technology       | Software & Tech Services     | 2020/12/21 |
| 47 | Brook                       | 2015                  | USA                    | <a href="https://www.brook.health">https://www.brook.health</a>                     | Other            | Other                        | 2020/12/24 |
| 48 | Xbird                       | 2015                  | Germany                | <a href="https://xbird.io">https://xbird.io</a>                                     | Other            | Other                        | 2020/12/24 |
| 49 | MyNetDiary                  | 2005                  | USA                    | <a href="https://www.mynetdiary.com">https://www.mynetdiary.com</a>                 | Other            | Other                        | 2020/12/24 |
| 50 | Calorie King                | 1998                  | USA                    | <a href="https://www.calorieking.com/us/en/">https://www.calorieking.com/us/en/</a> | Communications   | Media                        | 2020/12/21 |
| 51 | Whisk                       | 2012                  | UK                     | <a href="https://whisk.com">https://whisk.com</a>                                   | Communications   | Media                        | 2020/12/21 |
| 52 | Allscripts                  | 1986                  | USA                    | <a href="https://as.allscripts.com">https://as.allscripts.com</a>                   | Technology       | Software & Tech Services     | 2020/12/21 |
| 53 | ScienceSoft USA Corporation | 1989                  | USA                    | <a href="https://www.scnsoft.com">https://www.scnsoft.com</a>                       | Technology       | Software & Tech Services     | 2020/12/21 |
| 54 | RMDY Health                 | 1999                  | USA                    | <a href="https://rmdy.optimizerx.com">https://rmdy.optimizerx.com</a>               | Consumer Staples | Retail & Wholesale - Staples | 2020/12/21 |
| 55 | Rimidi                      | 2012                  | USA                    | <a href="https://rimidi.com">https://rimidi.com</a>                                 | Technology       | Software & Tech Services     | 2020/12/21 |
| 56 | Diabetes.co.uk              | 2001                  | UK                     | <a href="https://www.diabetes.co.uk">https://www.diabetes.co.uk</a>                 | Other            | Other                        | 2020/12/24 |
| 57 | DiabetesMine                | 2005                  | USA                    | <a href="https://www.diabetesmine.com/">https://www.diabetesmine.com/</a>           | Communications   | Media                        | 2020/12/21 |

| #  | Company name             | Year of establishment | Country of headquarter | Company homepage                                                                                                              | Sector      | Industry                    | Accessed   |
|----|--------------------------|-----------------------|------------------------|-------------------------------------------------------------------------------------------------------------------------------|-------------|-----------------------------|------------|
| 58 | Willis Towers Watson     | 1828                  | UK                     | <a href="https://www.willistowerswatson.com/">https://www.willistowerswatson.com/</a>                                         | Financials  | Insurance                   | 2020/12/21 |
| 59 | Sanvita Medical          | 2016                  | Netherland             | <a href="https://www.sanvita.nl/">https://www.sanvita.nl/</a>                                                                 | Health Care | Biotech & Pharma            | 2020/12/21 |
| 60 | Johnson & Johnson        | 1886                  | USA                    | <a href="http://www.jnj.com/">http://www.jnj.com/</a>                                                                         | Health Care | Biotech & Pharma            | 2020/12/21 |
| 61 | Platinum Equity          | 1995                  | USA                    | <a href="http://www.platinumequity.com/">http://www.platinumequity.com/</a>                                                   | Financials  | Financial Services          | 2020/12/21 |
| 62 | GE Healthcare            | 1892                  | USA                    | <a href="http://www.gehealthcare.com/">http://www.gehealthcare.com/</a>                                                       | Health Care | Medical Equipment & Devices | 2020/12/21 |
| 63 | Viewics                  | 2010                  | USA                    | <a href="https://viewics.com/">https://viewics.com/</a>                                                                       | Technology  | Software & Tech Services    | 2020/12/21 |
| 64 | Qualcomm Life            | 2011                  | USA                    | <a href="http://www.qualcomm.life.com/">http://www.qualcomm.life.com/</a>                                                     | Health Care | Medical Equipment & Devices | 2020/12/21 |
| 65 | Blackstone Life Sciences | 2005                  | USA                    | <a href="https://www.blackstone.com/our-businesses/life-sciences">https://www.blackstone.com/our-businesses/life-sciences</a> | Financials  | Financial Services          | 2020/12/21 |
| 66 | Klue                     | 2016                  | USA                    | <a href="https://goklue.com/index">https://goklue.com/index</a>                                                               | Technology  | Software & Tech Services    | 2020/12/21 |
| 67 | ChristianaCare           | 1888                  | USA                    | <a href="http://christianacare.org/">http://christianacare.org/</a>                                                           | Industrials | Industrial Services         | 2020/12/21 |

| #  | Company name                                           | Year of establishment | Country of headquarter | Company homepage                                                                              | Sector         | Industry                         | Accessed   |
|----|--------------------------------------------------------|-----------------------|------------------------|-----------------------------------------------------------------------------------------------|----------------|----------------------------------|------------|
| 68 | Capital District Physicians' Health Plan, Inc. (CDPHP) | 1984                  | USA                    | <a href="https://www.cdphp.com">https://www.cdphp.com</a>                                     | Financials     | Insurance                        | 2020/12/21 |
| 69 | Tidepool                                               | 2011                  | USA                    | <a href="http://www.tidepool.co/">http://www.tidepool.co/</a>                                 | Communications | Media                            | 2020/12/21 |
| 70 | Blue Cross and Blue Shield                             | 1929                  | USA                    | <a href="http://www.bcbs.com/">http://www.bcbs.com/</a>                                       | Health Care    | Health Care<br>Facilities & Svcs | 2020/12/21 |
| 71 | Nutrino Health                                         | 2011                  | Israel                 | <a href="https://nutrinohealth.com/">https://nutrinohealth.com/</a>                           | Technology     | Software & Tech<br>Services      | 2020/12/21 |
| 72 | Diabeter                                               | 2001                  | Netherland             | <a href="https://diabeter.nl/">https://diabeter.nl/</a>                                       | Health Care    | Health Care<br>Facilities & Svcs | 2020/12/22 |
| 73 | Henry Schein                                           | 1932                  | USA                    | <a href="http://www.henryschein.com/Default.aspx">http://www.henryschein.com/Default.aspx</a> | Health Care    | Health Care<br>Facilities & Svcs | 2020/12/21 |
| 74 | BD                                                     | 1897                  | USA                    | <a href="https://www.bd.com/en-us">https://www.bd.com/en-us</a>                               | Health Care    | Medical Equipment &<br>Devices   | 2020/12/21 |
| 75 | Aetna                                                  | 1853                  | USA                    | <a href="http://aetna.com/">http://aetna.com/</a>                                             | Health Care    | Health Care<br>Facilities & Svcs | 2020/12/21 |
| 76 | Sanofi                                                 | 2004                  | France                 | <a href="https://www.sanofi.com/">https://www.sanofi.com/</a>                                 | Health Care    | Biotech & Pharma                 | 2020/12/21 |
| 77 | National Institute of Hospital (China)                 | Unknown               | China                  |                                                                                               | Other          | Other                            | 2020/12/24 |
| 78 | Bayer                                                  | 2006                  | Germany                | <a href="http://www.bayerhealthcare.com/">http://www.bayerhealthcare.com/</a>                 | Health Care    | Biotech & Pharma                 | 2020/12/21 |

| #  | Company name                          | Year of establishment | Country of headquarter | Company homepage                                                        | Sector                 | Industry                       | Accessed   |
|----|---------------------------------------|-----------------------|------------------------|-------------------------------------------------------------------------|------------------------|--------------------------------|------------|
| 79 | Senseonics                            | 1996                  | USA                    | <a href="http://senseonics.com/">http://senseonics.com/</a>             | Health Care            | Medical Equipment & Devices    | 2020/12/21 |
| 80 | POCTech                               | 2010                  | China                  | <a href="http://poctechcorp.com/">http://poctechcorp.com/</a>           | Consumer Staples       | Retail & Wholesale - Staples   | 2020/12/21 |
| 82 | Quattro Folia                         | 2012                  | Finland                | <a href="http://www.quattrofolia.com/">http://www.quattrofolia.com/</a> | Other                  | Other                          | 2020/12/24 |
| 83 | Voluntis                              | 2001                  | France                 | <a href="http://www.voluntis.com/">http://www.voluntis.com/</a>         | Technology             | Software & Tech Services       | 2020/12/21 |
| 84 | myDiabby                              | 2014                  | France                 | <a href="https://www.mydiabby.com/">https://www.mydiabby.com/</a>       | Other                  | Other                          | 2020/12/24 |
| 85 | Rubin Medical                         | 2004                  | Sweden                 | <a href="http://www.rubinmedical.se">www.rubinmedical.se</a>            | Consumer Discretionary | Retail & Whsle - Discretionary | 2020/12/21 |
| 86 | Australasian Medical & Scientific Ltd | 1991                  | Australia              | <a href="https://www.amsl.com.au">https://www.amsl.com.au</a>           | Communications         | Media                          | 2020/12/21 |
| 87 | New Zealand Medical & Scientific Ltd  | 1982                  | New Zealand            | <a href="https://www.nzms.co.nz">https://www.nzms.co.nz</a>             | Health Care            | Health Care Facilities & Svcs  | 2020/12/21 |
| 88 | Movi SpA                              | 1952                  | Italy                  | <a href="http://www.movigroup.com">www.movigroup.com</a>                | Technology             | Tech Hardware & Semiconductors | 2020/12/21 |
| 89 | TypeZero Technologies                 | 2013                  | USA                    | <a href="http://typezero.com/">http://typezero.com/</a>                 | Technology             | Software & Tech Services       | 2020/12/21 |

| #   | Company name      | Year of establishment | Country of headquarter | Company homepage                                                                  | Sector                 | Industry                       | Accessed   |
|-----|-------------------|-----------------------|------------------------|-----------------------------------------------------------------------------------|------------------------|--------------------------------|------------|
| 90  | Diasend           | 2005                  | USA                    | <a href="https://www.diasend.com/">https://www.diasend.com/</a>                   | Technology             | Software & Tech Services       | 2020/12/21 |
| 91  | JDRF              | 1970                  | USA                    | <a href="http://jdrf.org/">http://jdrf.org/</a>                                   | Health Care            | Health Care Facilities & Svcs  | 2020/12/21 |
| 92  | Sugarmate         | 2016                  | USA                    | <a href="https://sugarmate.io/">https://sugarmate.io/</a>                         | Health Care            | Medical Equipment & Devices    | 2020/12/21 |
| 93  | Axenia            |                       | Uruguay                | <a href="https://www.axenia.com">https://www.axenia.com</a>                       | Other                  | Other                          | 2020/12/24 |
| 94  | Sano              | 2011                  | USA                    | <a href="http://sano.co/">http://sano.co/</a>                                     | Health Care            | Medical Equipment & Devices    | 2020/12/21 |
| 95  | Walmart           | 1962                  | USA                    | <a href="http://www.walmart.com/">http://www.walmart.com/</a>                     | Consumer Staples       | Retail & Wholesale - Staples   | 2020/12/21 |
| 97  | Springbuk         | 2015                  | USA                    | <a href="https://www.springbuk.com/">https://www.springbuk.com/</a>               | Technology             | Software & Tech Services       | 2020/12/21 |
| 98  | OneDigital        | 2000                  | USA                    | <a href="https://www.onedigital.com/">https://www.onedigital.com/</a>             | Financials             | Insurance                      | 2020/12/21 |
| 99  | Amazon            | 1994                  | USA                    | <a href="http://amazon.com/">http://amazon.com/</a>                               | Consumer Discretionary | Retail & Whsle - Discretionary | 2020/12/21 |
| 100 | John Hancock      | 1862                  | USA                    | <a href="http://www.johnhancock.com/">http://www.johnhancock.com/</a>             | Financials             | Insurance                      | 2020/12/21 |
| 101 | Companion Medical | 2013                  | USA                    | <a href="http://www.companion-medical.com/">http://www.companion-medical.com/</a> | Health Care            | Medical Equipment & Devices    | 2020/12/21 |

| #   | Company name                                  | Year of establishment | Country of headquarter | Company homepage                                                                                | Sector         | Industry                    | Accessed   |
|-----|-----------------------------------------------|-----------------------|------------------------|-------------------------------------------------------------------------------------------------|----------------|-----------------------------|------------|
| 102 | MannKind                                      | 2001                  | USA                    | <a href="http://mannkindcorp.com/">http://mannkindcorp.com/</a>                                 | Health Care    | Biotech & Pharma            | 2020/12/21 |
| 103 | CTBC Bank                                     | 1999                  | Canada                 | <a href="http://www.ctbcbank.ca/PersonalBanking">http://www.ctbcbank.ca/PersonalBanking</a>     | Financials     | Banking                     | 2020/12/21 |
| 104 | Bitmark                                       | 2014                  | Taiwan                 | <a href="https://bitmark.com/">https://bitmark.com/</a>                                         | Technology     | Software & Tech Services    | 2020/12/21 |
| 105 | Sompo Japan Nipponkoa Himawari Life Insurance | 1981                  | Japan                  | <a href="https://www.himawari-life.co.jp/company/">https://www.himawari-life.co.jp/company/</a> | Financials     | Insurance                   | 2020/12/21 |
| 106 | Taiwan Ministry of Health                     | Unknown               | Taiwan                 | <a href="https://www.mohw.gov.tw/mp-2.html">https://www.mohw.gov.tw/mp-2.html</a>               | Other          | Other                       | 2020/12/24 |
| 107 | Eli Lilly                                     | 1876                  | USA                    | <a href="https://www.lilly.com">https://www.lilly.com</a>                                       | Health Care    | Biotech & Pharma            | 2020/12/21 |
| 108 | Nintamed                                      | 2012                  | Germany                | <a href="https://www.nintamed.eu/">https://www.nintamed.eu/</a>                                 | Health Care    | Medical Equipment & Devices | 2020/12/21 |
| 109 | Animas                                        | 1996                  | USA                    | <a href="https://www.animas.com">https://www.animas.com</a>                                     | Health Care    | Medical Equipment & Devices | 2020/12/22 |
| 110 | SweetSpot                                     | 2012                  | USA                    | <a href="https://www.sweetspot.com/">https://www.sweetspot.com/</a>                             | Communications | Media                       | 2020/12/22 |
| 111 | Edwards Lifesciences                          | 1958                  | USA                    | <a href="http://www.edwards.com/">http://www.edwards.com/</a>                                   | Health Care    | Medical Equipment & Devices | 2020/12/22 |
| 112 | CARE                                          | 1945                  | USA                    | <a href="https://care.org">https://care.org</a>                                                 | Other          | Other                       | 2020/12/24 |

| #   | Company name                  | Year of establishment | Country of headquarter | Company homepage                                                                                      | Sector                    | Industry                              | Accessed   |
|-----|-------------------------------|-----------------------|------------------------|-------------------------------------------------------------------------------------------------------|---------------------------|---------------------------------------|------------|
| 113 | University of Virginia Center | 1819                  | USA                    | <a href="https://www.virginia.edu/aboutuva">https://www.virginia.edu/aboutuva</a>                     | Consumer<br>Discretionary | Consumer<br>Discretionary<br>Services | 2020/12/24 |
| 114 | UNICEF                        | 1946                  | USA                    | <a href="https://www.unicef.org">https://www.unicef.org</a>                                           | Consumer<br>Discretionary | Consumer<br>Discretionary<br>Services | 2020/12/22 |
| 115 | Embark                        | 2016                  | Denmark                | <a href="http://www.embarkbiotech.com">http://www.embarkbiotech.com</a>                               | Other                     | Other                                 | 2020/12/24 |
| 116 | Danish Government             | 1909                  | Denmark                |                                                                                                       | Other                     | Other                                 | 2020/12/24 |
| 117 | Ziyo                          | 2014                  | UK                     | <a href="http://www.ziyo.com/">http://www.ziyo.com/</a>                                               | Health Care               | Biotech & Pharma                      | 2020/12/22 |
| 118 | Kallyope                      | 2015                  | USA                    | <a href="http://www.kallyope.com/">http://www.kallyope.com/</a>                                       | Health Care               | Biotech & Pharma                      | 2020/12/22 |
| 119 | University of Oxford          | Unknown               | UK                     | <a href="https://www.ox.ac.uk">https://www.ox.ac.uk</a>                                               | Consumer<br>Discretionary | Consumer<br>Discretionary<br>Services | 2020/12/24 |
| 120 | University of Washington      | 1861                  | USA                    | <a href="https://www.washington.edu">https://www.washington.edu</a>                                   | Consumer<br>Discretionary | Consumer<br>Discretionary<br>Services | 2020/12/24 |
| 121 | Calibrium                     | 2012                  | USA                    | <a href="http://www.calibrium.com/">http://www.calibrium.com/</a>                                     | Health Care               | Biotech & Pharma                      | 2020/12/22 |
| 122 | MB2                           | 2014                  | USA                    | <a href="https://www.crunchbase.com/organization/mb2">https://www.crunchbase.com/organization/mb2</a> | Health Care               | Biotech & Pharma                      | 2020/12/22 |

| #   | Company name          | Year of establishment | Country of headquarter | Company homepage                                                                                                                                                                                                                                                | Sector                    | Industry                              | Accessed   |
|-----|-----------------------|-----------------------|------------------------|-----------------------------------------------------------------------------------------------------------------------------------------------------------------------------------------------------------------------------------------------------------------|---------------------------|---------------------------------------|------------|
| 123 | Karolinska Institutet | 1810                  | Sweden                 | <a href="https://ki.se">https://ki.se</a>                                                                                                                                                                                                                       | Consumer<br>Discretionary | Consumer<br>Discretionary<br>Services | 2020/12/24 |
| 124 | Mode AGC              | Unknown               | USA                    | <a href="https://investor.insulet.com/news-releases/news-release-details/insulet-announces-development-partner-omnipod-artificial">https://investor.insulet.com/news-releases/news-release-details/insulet-announces-development-partner-omnipod-artificial</a> | Other                     | Other                                 | 2020/12/24 |
| 125 | Ypsomed               | 2003                  | Switzerland            | <a href="https://www.ypsomed.com/en/">https://www.ypsomed.com/en/</a>                                                                                                                                                                                           | Health Care               | Biotech & Pharma                      | 2020/12/22 |
| 126 | GlaxoSmithKline       | 1929                  | UK                     | <a href="http://www.gsk.com/">http://www.gsk.com/</a>                                                                                                                                                                                                           | Health Care               | Biotech & Pharma                      | 2020/12/22 |
| 127 | ViCentra              | 2013                  | Netherland             | <a href="http://www.vicentra.com/">http://www.vicentra.com/</a>                                                                                                                                                                                                 | Health Care               | Medical Equipment &<br>Devices        | 2020/12/22 |
| 128 | Accolade              | 2007                  | USA                    | <a href="http://www.accolade.com/">http://www.accolade.com/</a>                                                                                                                                                                                                 | Health Care               | Health Care<br>Facilities & Svcs      | 2020/12/22 |
| 129 | Healthimation         | 2016                  | USA                    | <a href="https://healthimation.com">https://healthimation.com</a>                                                                                                                                                                                               | Other                     | Other                                 | 2020/12/24 |
| 130 | TPMENA                | Unknown               | Saudi Arabia           | <a href="http://www.tpmena.com">http://www.tpmena.com</a>                                                                                                                                                                                                       | Other                     | Other                                 | 2020/12/24 |

| #   | Company name                 | Year of establishment | Country of headquarter | Company homepage                                                                                                                                                                                                                                                  | Sector      | Industry                      | Accessed   |
|-----|------------------------------|-----------------------|------------------------|-------------------------------------------------------------------------------------------------------------------------------------------------------------------------------------------------------------------------------------------------------------------|-------------|-------------------------------|------------|
| 131 | Al-Danah                     | 1990                  | Qatar                  | <a href="http://www.aldanahmedical.com/Default.aspx">http://www.aldanahmedical.com/Default.aspx</a>                                                                                                                                                               | Other       | Other                         | 2020/12/24 |
| 132 | Dallas Burston<br>Ethitronix | 2014                  | Jersey                 | <a href="http://www.datalog.co.uk/browse/detail.php/CompanyNumber/JE115335/CompanyName/DALLAS+BURSTON+PHARMMA+%28JERSEY%29+LIMITED">http://www.datalog.co.uk/browse/detail.php/CompanyNumber/JE115335/CompanyName/DALLAS+BURSTON+PHARMMA+%28JERSEY%29+LIMITED</a> | Other       | Other                         | 2020/12/24 |
| 133 | Device Technologies          | 1992                  | Australia              | <a href="https://www.device.com.au">https://www.device.com.au</a>                                                                                                                                                                                                 | Health Care | Medical Equipment & Devices   | 2020/12/22 |
| 134 | Shenzen CAS Health           | 2018                  | China                  | <a href="https://cas-envision.en.made-in-china.com">https://cas-envision.en.made-in-china.com</a>                                                                                                                                                                 | Other       | Other                         | 2020/12/24 |
| 135 | DBJ Jersey                   | 1993                  | Jersey                 | <a href="http://www.dbj.co.je">http://www.dbj.co.je</a>                                                                                                                                                                                                           | Industrials | Industrial Products           | 2020/12/24 |
| 136 | Care Innovations             | 2010                  | USA                    | <a href="https://www.careinnovations.com">https://www.careinnovations.com</a>                                                                                                                                                                                     | Technology  | Software & Tech Services      | 2020/12/22 |
| 137 | Teladoc                      | 2002                  | USA                    | <a href="https://teladochealth.com">https://teladochealth.com</a>                                                                                                                                                                                                 | Health Care | Health Care Facilities & Svcs | 2020/12/22 |
| 138 | Prognos                      | 2010                  | USA                    | <a href="https://prognoshealth.com">https://prognoshealth.com</a>                                                                                                                                                                                                 | Health Care | Medical Equipment & Devices   | 2020/12/22 |
| 139 | MDLIVE                       | 2009                  | USA                    | <a href="http://mdlive.com/">http://mdlive.com/</a>                                                                                                                                                                                                               | Technology  | Software & Tech Services      | 2020/12/22 |

| #   | Company name            | Year of establishment | Country of headquarter | Company homepage                                                                | Sector           | Industry                     | Accessed   |
|-----|-------------------------|-----------------------|------------------------|---------------------------------------------------------------------------------|------------------|------------------------------|------------|
| 140 | Doctor On Demand        | 2012                  | USA                    | <a href="https://www.doctorondemand.com/">https://www.doctorondemand.com/</a>   | Technology       | Software & Tech Services     | 2020/12/22 |
| 141 | VSP Vision Care         | 1955                  | USA                    | <a href="http://www.vsp.com/">http://www.vsp.com/</a>                           | Financials       | Insurance                    | 2020/12/22 |
| 142 | Williams Medical        | 1986                  | UK                     | <a href="http://www.wms.co.uk/">http://www.wms.co.uk/</a>                       | Health Care      | Medical Equipment & Devices  | 2020/12/22 |
| 143 | Dance Biopharm          | 2009                  | USA                    | <a href="https://aerami.com">https://aerami.com</a>                             | Health Care      | Biotech & Pharma             | 2020/12/22 |
| 144 | Glytec                  | 2006                  | USA                    | <a href="http://www.glytecsystems.com/">http://www.glytecsystems.com/</a>       | Other            | Other                        | 2020/12/24 |
| 145 | Better Living Now       | 1992                  | USA                    | <a href="http://www.betterlivingnow.com/">http://www.betterlivingnow.com/</a>   | Health Care      | Medical Equipment & Devices  | 2020/12/22 |
| 146 | Giant Eagle             | 1931                  | USA                    | <a href="https://www.gianteagle.com/">https://www.gianteagle.com/</a>           | Consumer Staples | Retail & Wholesale - Staples | 2020/12/22 |
| 147 | Byram Healthcare        | 1968                  | USA                    | <a href="https://www.byramhealthcare.com/">https://www.byramhealthcare.com/</a> | Health Care      | Medical Equipment & Devices  | 2020/12/22 |
| 148 | CCS Medical             | 1994                  | USA                    | <a href="http://www.ccsmed.com/">http://www.ccsmed.com/</a>                     | Health Care      | Medical Equipment & Devices  | 2020/12/22 |
| 149 | GEMCO Medical           | 1992                  | USA                    | <a href="https://www.gemcomedical.com">https://www.gemcomedical.com</a>         | Other            | Other                        | 2020/12/24 |
| 150 | Centaur Pharmaceuticals | 1978                  | India                  | <a href="https://www.centaurpharma.com">https://www.centaurpharma.com</a>       | Health Care      | Biotech & Pharma             | 2020/12/22 |

| #   | Company name                  | Year of establishment | Country of headquarter | Company homepage                                                                                                                                                      | Sector      | Industry                      | Accessed   |
|-----|-------------------------------|-----------------------|------------------------|-----------------------------------------------------------------------------------------------------------------------------------------------------------------------|-------------|-------------------------------|------------|
| 151 | McCabi Healthcare             | 1941                  | Israel                 | <a href="https://www.maccabi4u.co.il/14-he/Maccabi.aspx">https://www.maccabi4u.co.il/14-he/Maccabi.aspx</a>                                                           | Health Care | Health Care Facilities & Svcs | 2020/12/22 |
| 152 | uHealth Australia Pty Limited | Unknown               | Australia              | <a href="https://uhealth-aus.com">https://uhealth-aus.com</a>                                                                                                         | Health Care | Medical Equipment & Devices   | 2020/12/22 |
| 153 | InnoMed Ltd.                  | 1989                  | Hungary                | <a href="https://www.innomed.hu/en/">https://www.innomed.hu/en/</a>                                                                                                   | Health Care | Medical Equipment & Devices   | 2020/12/22 |
| 154 | Farla Medical, Inc.           | 2002                  | UK                     | <a href="https://www.farlamedical.co.uk/information/about-us">https://www.farlamedical.co.uk/information/about-us</a>                                                 | Health Care | Health Care Facilities & Svcs | 2020/12/22 |
| 155 | Geo-Med, LLC                  | 2004                  | USA                    | <a href="https://www.geomedsdvo.com">https://www.geomedsdvo.com</a>                                                                                                   | Health Care | Medical Equipment & Devices   | 2020/12/22 |
| 156 | Beta Bionics                  | 2015                  | USA                    | <a href="http://www.betabionics.com/">http://www.betabionics.com/</a>                                                                                                 | Health Care | Biotech & Pharma              | 2020/12/22 |
| 157 | ASN Technologies              | 2000                  | USA                    | <a href="https://www.senseonics.com/investor-relations/news-releases/2015/11-12-2015">https://www.senseonics.com/investor-relations/news-releases/2015/11-12-2015</a> | Health Care | Biotech & Pharma              | 2020/12/22 |
| 158 | Allegheny Health Network      | 2013                  | USA                    | <a href="https://www.ahn.org">https://www.ahn.org</a>                                                                                                                 | Health Care | Health Care Facilities & Svcs | 2020/12/22 |
| 159 | Owen Mumford                  | 1952                  | UK                     | <a href="http://www.owenmumford.com/en/">http://www.owenmumford.com/en/</a>                                                                                           | Health Care | Medical Equipment & Devices   | 2020/12/22 |

| #   | Company name                    | Year of establishment | Country of headquarter | Company homepage                                                                                                                            | Sector                 | Industry                        | Accessed   |
|-----|---------------------------------|-----------------------|------------------------|---------------------------------------------------------------------------------------------------------------------------------------------|------------------------|---------------------------------|------------|
| 160 | Asante Solutions                | 2006                  | USA                    | <a href="http://www.asantesolutions.com/">http://www.asantesolutions.com/</a>                                                               | Health Care            | Medical Equipment & Devices     | 2020/12/22 |
| 161 | WellCare Health Plans           | 1985                  | USA                    | <a href="https://www.wellcare.com">https://www.wellcare.com</a>                                                                             | Health Care            | Health Care Facilities & Svcs   | 2020/12/22 |
| 162 | Solera Health                   | 2015                  | USA                    | <a href="https://www.soleranetwork.com/en/">https://www.soleranetwork.com/en/</a>                                                           | Technology             | Software & Tech Services        | 2020/12/22 |
| 163 | Cardiogram                      | 2016                  | USA                    | <a href="https://cardiogr.am/">https://cardiogr.am/</a>                                                                                     | Technology             | Software & Tech Services        | 2020/12/22 |
| 164 | Agfa HealthCare                 | 1867                  | Belgium                | <a href="http://www.agfahealthcare.com/global/en/main/landing/index.jsp">http://www.agfahealthcare.com/global/en/main/landing/index.jsp</a> | Health Care            | Medical Equipment & Devices     | 2020/12/22 |
| 165 | Anne Arundel Medical Center     | 1902                  | USA                    | <a href="https://www.aamccareers.org">https://www.aamccareers.org</a>                                                                       | Health Care            | Health Care Facilities & Svcs   | 2020/12/22 |
| 166 | Baptist Health South Florida    | 1990                  | USA                    | <a href="https://baptisthealth.net/en">https://baptisthealth.net/en</a>                                                                     | Health Care            | Health Care Facilities & Svcs   | 2020/12/22 |
| 167 | Eastern Virginia Medical School | 1964                  | USA                    | <a href="https://www.evms.edu">https://www.evms.edu</a>                                                                                     | Consumer Discretionary | Consumer Discretionary Services | 2020/12/24 |
| 168 | Hologic, Inc.                   | 1985                  | USA                    | <a href="http://www.hologic.com/">http://www.hologic.com/</a>                                                                               | Health Care            | Medical Equipment & Devices     | 2020/12/22 |

| #   | Company name                          | Year of establishment | Country of headquarter | Company homepage                                                            | Sector                 | Industry                       | Accessed   |
|-----|---------------------------------------|-----------------------|------------------------|-----------------------------------------------------------------------------|------------------------|--------------------------------|------------|
| 169 | ifa systems AG                        | 1987                  | France                 | <a href="https://www.ifasystems.de">https://www.ifasystems.de</a>           | Technology             | Software & Tech Services       | 2020/12/22 |
| 170 | inoveon                               | 1999                  | USA                    | <a href="http://www.inoveon.com/">http://www.inoveon.com/</a>               | Consumer Discretionary | Retail & Whsle - Discretionary | 2020/12/22 |
| 171 | Radiology Associates of South Florida | 1960                  | USA                    | <a href="http://rasf.net">http://rasf.net</a>                               | Health Care            | Health Care Facilities & Svcs  | 2020/12/22 |
| 172 | Sentara Healthcare                    | 1988                  | USA                    | <a href="https://www.sentara.com/">https://www.sentara.com/</a>             | Health Care            | Health Care Facilities & Svcs  | 2020/12/22 |
| 173 | Sheridan Healthcare                   | 1953                  | USA                    | <a href="http://sheridanhealthcare.com/">http://sheridanhealthcare.com/</a> | Health Care            | Health Care Facilities & Svcs  | 2020/12/22 |
| 174 | Topcon                                | 1932                  | Japan                  | <a href="https://global.topcon.com">https://global.topcon.com</a>           | Technology             | Tech Hardware & Semiconductors | 2020/12/22 |
| 175 | UC San Diego Health                   | 1966                  | USA                    | <a href="https://health.ucsd.edu/">https://health.ucsd.edu/</a>             | Health Care            | Health Care Facilities & Svcs  | 2020/12/22 |
| 176 | University of Miami Health System     | 1993                  | USA                    | <a href="http://uhealthsystem.com/">http://uhealthsystem.com/</a>           | Health Care            | Health Care Facilities & Svcs  | 2020/12/24 |
| 177 | University of Vermont Health Network  | 2011                  | USA                    | <a href="https://www.uvmhealth.org/">https://www.uvmhealth.org/</a>         | Health Care            | Health Care Facilities & Svcs  | 2020/12/24 |
| 178 | vRad                                  | 2001                  | USA                    | <a href="https://www.vrad.com">https://www.vrad.com</a>                     | Other                  | Other                          | 2020/12/24 |
| 179 | Merge Healthcare                      | 1987                  | USA                    | <a href="http://www.merge.com/">http://www.merge.com/</a>                   | Technology             | Software & Tech Services       | 2020/12/22 |

| #   | Company name                                                  | Year of establishment | Country of headquarter | Company homepage                                                        | Sector                 | Industry                        | Accessed   |
|-----|---------------------------------------------------------------|-----------------------|------------------------|-------------------------------------------------------------------------|------------------------|---------------------------------|------------|
| 180 | American Diabetes Association                                 | 1940                  | USA                    | <a href="http://diabetes.org/">http://diabetes.org/</a>                 | Consumer Discretionary | Consumer Discretionary Services | 2020/12/22 |
| 181 | Explorys                                                      | 2009                  | USA                    | <a href="http://www.explorys.com/">http://www.explorys.com/</a>         | Technology             | Software & Tech Services        | 2020/12/22 |
| 182 | Phytel                                                        | 1996                  | USA                    | <a href="http://www.phytel.com/">http://www.phytel.com/</a>             | Health Care            | Health Care Facilities & Svcs   | 2020/12/22 |
| 183 | Onduo                                                         | 2016                  | USA                    | <a href="https://onduo.com/">https://onduo.com/</a>                     | Other                  | Other                           | 2020/12/24 |
| 184 | Veterans Administration Palo Alto Healthcare System (VAPAHCS) | Unknown               | USA                    | <a href="https://www.paloalto.va.gov">https://www.paloalto.va.gov</a>   | Other                  | Other                           | 2020/12/24 |
| 185 | Atrius Health                                                 | 2004                  | USA                    | <a href="https://www.atriushealth.org">https://www.atriushealth.org</a> | Health Care            | Health Care Facilities & Svcs   | 2020/12/22 |
| 186 | Novartis                                                      | 1996                  | Switzerland            | <a href="http://www.novartis.com/">http://www.novartis.com/</a>         | Health Care            | Biotech & Pharma                | 2020/12/22 |
| 187 | Otsuka                                                        | 1964                  | Japan                  | <a href="http://www.otsuka.com/en/">http://www.otsuka.com/en/</a>       | Health Care            | Biotech & Pharma                | 2020/12/22 |
| 188 | Pfizer                                                        | 1849                  | USA                    |                                                                         | Health Care            | Biotech & Pharma                | 2020/12/22 |
| 189 | Duke University Health System                                 | 1925                  | USA                    | <a href="http://dukemedicine.org/">http://dukemedicine.org/</a>         | Health Care            | Health Care Facilities & Svcs   | 2020/12/22 |

| #   | Company name                             | Year of establishment | Country of headquarter | Company homepage                                                                          | Sector                 | Industry                        | Accessed   |
|-----|------------------------------------------|-----------------------|------------------------|-------------------------------------------------------------------------------------------|------------------------|---------------------------------|------------|
| 190 | Vanderbilt University Medical Center     | 1874                  | USA                    | <a href="https://www.vumc.org/main/home">https://www.vumc.org/main/home</a>               | Health Care            | Health Care Facilities & Svcs   | 2020/12/22 |
| 191 | University of Mississippi Medical Center | 1955                  | USA                    | <a href="https://www.umc.edu">https://www.umc.edu</a>                                     | Health Care            | Health Care Facilities & Svcs   | 2020/12/22 |
| 192 | Mayo Clinic                              | 1919                  | USA                    | <a href="https://www.mayoclinic.org/">https://www.mayoclinic.org/</a>                     | Health Care            | Health Care Facilities & Svcs   | 2020/12/22 |
| 193 | Regional Health in South Dakota          | Unknown               | USA                    |                                                                                           | Health Care            | Health Care Facilities & Svcs   | 2020/12/22 |
| 194 | University of Pittsburgh                 | 1787                  | USA                    | <a href="https://www.pitt.edu">https://www.pitt.edu</a>                                   | Consumer Discretionary | Consumer Discretionary Services | 2020/12/22 |
| 195 | Walgreens Boots Alliance                 | 1901                  | USA                    | <a href="http://www.walgreensbootalliance.com/">http://www.walgreensbootalliance.com/</a> | Consumer Staples       | Retail & Wholesale - Staples    | 2020/12/22 |
| 196 | ResMed                                   | 1989                  | USA                    | <a href="http://www.resmed.com/">http://www.resmed.com/</a>                               | Health Care            | Medical Equipment & Devices     | 2020/12/22 |
| 197 | Astellas                                 | 2005                  | Japan                  | <a href="http://www.astellas.com/">http://www.astellas.com/</a>                           | Health Care            | Biotech & Pharma                | 2020/12/22 |
| 198 | Mass General Brigham                     | 1994                  | USA                    | <a href="https://www.massgeneralbrigham.org">https://www.massgeneralbrigham.org</a>       | Health Care            | Health Care Facilities & Svcs   | 2020/12/22 |
| 199 | Competitive Health                       | 1996                  | USA                    | <a href="https://competitivehealth.com">https://competitivehealth.com</a>                 | Other                  | Other                           | 2020/12/24 |

| #   | Company name                           | Year of establishment | Country of headquarter | Company homepage                                                                                                                    | Sector                 | Industry                        | Accessed   |
|-----|----------------------------------------|-----------------------|------------------------|-------------------------------------------------------------------------------------------------------------------------------------|------------------------|---------------------------------|------------|
| 200 | Redox                                  | 2014                  | USA                    | <a href="https://www.redoxengine.com">https://www.redoxengine.com</a>                                                               | Technology             | Software & Tech Services        | 2020/12/24 |
| 201 | Business Health Care Group (BHCG)      | 2003                  | USA                    | <a href="https://bhcgwi.org">https://bhcgwi.org</a>                                                                                 | Other                  | Other                           | 2020/12/24 |
| 202 | Human API                              | 2013                  | USA                    | <a href="http://humanapi.co/">http://humanapi.co/</a>                                                                               | Technology             | Software & Tech Services        | 2020/12/22 |
| 203 | type 1 diabetes                        | Unknown               |                        |                                                                                                                                     | Other                  | Other                           | 2020/12/24 |
| 204 | Fit4D                                  | 2009                  | USA                    | <a href="https://www.builtinnyc.com/company/fit4d">https://www.builtinnyc.com/company/fit4d</a>                                     | Other                  | Other                           | 2020/12/24 |
| 205 | AMC Health                             | 2002                  | USA                    | <a href="http://amchealth.com/">http://amchealth.com/</a>                                                                           | Health Care            | Health Care Facilities & Svcs   | 2020/12/22 |
| 206 | Valeritas                              | 2006                  | USA                    | <a href="http://www.valeritas.com/">http://www.valeritas.com/</a>                                                                   | Health Care            | Biotech & Pharma                | 2020/12/22 |
| 207 | Jaeb Center for Health Research (JCHR) | 1993                  | USA                    | <a href="https://www.jaeb.org/">https://www.jaeb.org/</a>                                                                           | Consumer Discretionary | Consumer Discretionary Services | 2020/12/22 |
| 208 | Humana                                 | 1964                  | USA                    | <a href="https://www.humana.com">https://www.humana.com</a>                                                                         | Health Care            | Health Care Facilities & Svcs   | 2020/12/22 |
| 209 | Bronx-Lebanon Hospital Center          | 1890                  | USA                    | <a href="https://www.wadsworth.org/locations/bronx-lebanon-hospital">https://www.wadsworth.org/locations/bronx-lebanon-hospital</a> | Health Care            | Health Care Facilities & Svcs   | 2020/12/22 |

| #   | Company name                              | Year of establishment | Country of headquarter | Company homepage                                                                                                                                                              | Sector                    | Industry                              | Accessed   |
|-----|-------------------------------------------|-----------------------|------------------------|-------------------------------------------------------------------------------------------------------------------------------------------------------------------------------|---------------------------|---------------------------------------|------------|
| 210 | Robin Hood Foundation                     | 1988                  | USA                    | <a href="http://www.robinhood.org/">http://www.robinhood.org/</a>                                                                                                             | Consumer<br>Discretionary | Consumer<br>Discretionary<br>Services | 2020/12/22 |
| 211 | EVERSANA                                  | 2018                  | USA                    | <a href="https://www.eversana.com/">https://www.eversana.com/</a>                                                                                                             | Technology                | Software & Tech<br>Services           | 2020/12/22 |
| 212 | Serena Ventures                           | 2014                  | USA                    | <a href="https://www.serenaventures.com/">https://www.serenaventures.com/</a>                                                                                                 | Financials                | Financial Services                    | 2020/12/22 |
| 213 | Samsung Ventures                          | 1999                  | South Korea            | <a href="http://www.samsungventures.com/">http://www.samsungventures.com/</a>                                                                                                 | Financials                | Financial Services                    | 2020/12/22 |
| 214 | Jamaica Hospital<br>Medical Center (JHMC) | 1898                  | USA                    | <a href="https://jamaicahospital.org">https://jamaicahospital.org</a>                                                                                                         | Health Care               | Health Care<br>Facilities & Svcs      | 2020/12/22 |
| 215 | CityMD                                    | 2010                  | USA                    | <a href="https://www.citymd.com/">https://www.citymd.com/</a>                                                                                                                 | Health Care               | Health Care<br>Facilities & Svcs      | 2020/12/22 |
| 216 | CareConnectors                            | 2013                  | USA                    | <a href="http://www.careconnectors.com/">http://www.careconnectors.com/</a>                                                                                                   | Other                     | Other                                 | 2020/12/24 |
| 217 | Physera                                   | 2015                  | USA                    | <a href="https://physera.com/">https://physera.com/</a>                                                                                                                       | Other                     | Other                                 | 2020/12/24 |
| 218 | Intermountain<br>Ventures                 | 2019                  | USA                    | <a href="https://intermountainhealthcare.org/about/transferring-healthcare/innovation/bu">https://intermountainhealthcare.org/about/transferring-healthcare/innovation/bu</a> | Health Care               | Health Care<br>Facilities & Svcs      | 2020/12/22 |

| #   | Company name                       | Year of establishment | Country of headquarter | Company homepage                                                                      | Sector                    | Industry                              | Accessed   |
|-----|------------------------------------|-----------------------|------------------------|---------------------------------------------------------------------------------------|---------------------------|---------------------------------------|------------|
|     |                                    |                       |                        | <a href="#">siness-development/ventures/</a>                                          |                           |                                       |            |
| 219 | Cigna                              | 1982                  | USA                    | <a href="http://www.cigna.com/">http://www.cigna.com/</a>                             | Health Care               | Health Care<br>Facilities & Svcs      | 2020/12/22 |
| 220 | American Medical Association (AMA) | 1847                  | USA                    | <a href="http://ama-assn.org/">http://ama-assn.org/</a>                               | Consumer<br>Discretionary | Consumer<br>Discretionary<br>Services | 2020/12/22 |
| 221 | GuideWell                          | 2011                  | USA                    | <a href="http://www.guidewell.com/">http://www.guidewell.com/</a>                     | Technology                | Software & Tech<br>Services           | 2020/12/22 |
| 222 | Workday                            | 2005                  | USA                    | <a href="http://www.workday.com/">http://www.workday.com/</a>                         | Technology                | Software & Tech<br>Services           | 2020/12/22 |
| 223 | WellSpan                           | 1880                  | USA                    | <a href="https://www.wellspan.org/">https://www.wellspan.org/</a>                     | Health Care               | Health Care<br>Facilities & Svcs      | 2020/12/22 |
| 224 | Point-of-Care Diagnostics          | 1995                  | Australia              | <a href="http://www.pocd.com.au/">http://www.pocd.com.au/</a>                         | Other                     | Other                                 | 2020/12/24 |
| 225 | Athenahealth                       | 1997                  | USA                    | <a href="http://www.athenahealth.com/">http://www.athenahealth.com/</a>               | Technology                | Software & Tech<br>Services           | 2020/12/22 |
| 226 | Abbott Medical Optics              | 1976                  | USA                    | <a href="http://www.abbottmedicaloptics.com/">http://www.abbottmedicaloptics.com/</a> | Consumer<br>Discretionary | Retail & Whsle -<br>Discretionary     | 2020/12/22 |

| #   | Company name            | Year of establishment | Country of headquarter | Company homepage                                                                | Sector           | Industry                       | Accessed   |
|-----|-------------------------|-----------------------|------------------------|---------------------------------------------------------------------------------|------------------|--------------------------------|------------|
| 227 | Walgreens               | 1901                  | USA                    | <a href="http://www.walgreens.com/">http://www.walgreens.com/</a>               | Consumer Staples | Retail & Wholesale - Staples   | 2020/12/22 |
| 228 | Hanmi Pharmaceutical    | 1973                  | South Korea            | <a href="http://www.hanmipharm.com/">http://www.hanmipharm.com/</a>             | Health Care      | Biotech & Pharma               | 2020/12/22 |
| 229 | Intel                   | 1968                  | USA                    | <a href="http://www.intel.com/">http://www.intel.com/</a>                       | Technology       | Tech Hardware & Semiconductors | 2020/12/22 |
| 230 | M+W Group               | 1912                  | Germany                | <a href="http://www.mwgroup.net/">http://www.mwgroup.net/</a>                   | Industrials      | Industrial Products            | 2020/12/22 |
| 231 | Renalytix AI            | 2018                  | UK                     | <a href="https://renalytixai.com/">https://renalytixai.com/</a>                 | Health Care      | Medical Equipment & Devices    | 2020/12/22 |
| 232 | Lexicon Pharmaceuticals | 1995                  | USA                    | <a href="http://www.lexpharma.com/">http://www.lexpharma.com/</a>               | Health Care      | Biotech & Pharma               | 2020/12/22 |
| 233 | Evotec                  | 1993                  | Germany                | <a href="http://evotec.com/">http://evotec.com/</a>                             | Health Care      | Health Care Facilities & Svcs  | 2020/12/22 |
| 234 | Biocon Biologics        | 1978                  | India                  | <a href="https://www.biocon.com/">https://www.biocon.com/</a>                   | Health Care      | Biotech & Pharma               | 2020/12/22 |
| 235 | Salesforce              | 1999                  | USA                    | <a href="https://www.salesforce.com/">https://www.salesforce.com/</a>           | Technology       | Software & Tech Services       | 2020/12/22 |
| 236 | AbbVie                  | 2013                  | USA                    | <a href="http://www.abbvie.com/">http://www.abbvie.com/</a>                     | Health Care      | Biotech & Pharma               | 2020/12/22 |
| 237 | Akili Interactive       | 2011                  | USA                    | <a href="http://www.akiliinteractive.com/">http://www.akiliinteractive.com/</a> | Technology       | Software & Tech Services       | 2020/12/22 |
| 238 | Propeller Health        | 2007                  | USA                    | <a href="http://www.propellerhealth.com/">http://www.propellerhealth.com/</a>   | Communications   | Media                          | 2020/12/22 |

| #   | Company name                      | Year of establishment | Country of headquarter | Company homepage                                                                                                      | Sector      | Industry                      | Accessed   |
|-----|-----------------------------------|-----------------------|------------------------|-----------------------------------------------------------------------------------------------------------------------|-------------|-------------------------------|------------|
| 239 | Evidation                         | 2012                  | USA                    | <a href="http://www.evidation.com/">http://www.evidation.com/</a>                                                     | Technology  | Software & Tech Services      | 2020/12/22 |
| 240 | Boehringer Ingelheim              | 1885                  | Germany                | <a href="https://www.boehringer-&lt;br/&gt;ingelheim.com/">https://www.boehringer-<br/>ingelheim.com/</a>             | Health Care | Biotech & Pharma              | 2020/12/22 |
| 241 | IDx                               | 2010                  | USA                    | <a href="https://www.eyediagnosis&lt;br/&gt;.co/?ref=Welcome.AI">https://www.eyediagnosis<br/>.co/?ref=Welcome.AI</a> | Other       | Other                         | 2020/12/24 |
| 242 | Hidrate                           | 2014                  | USA                    | <a href="https://hidratespark.com/">https://hidratespark.com/</a>                                                     | Other       | Other                         | 2020/12/24 |
| 243 | Telcare                           | 2008                  | USA                    | <a href="http://www.telcare.com/">http://www.telcare.com/</a>                                                         | Health Care | Health Care Facilities & Svcs | 2020/12/22 |
| 244 | pCare                             | 1950                  | USA                    | <a href="https://www.p-care.com/">https://www.p-care.com/</a>                                                         | Other       | Other                         | 2020/12/24 |
| 245 | Zealand Pharma                    | 1998                  | Denmark                | <a href="http://www.zealandpharma.com">www.zealandpharma.com</a>                                                      | Health Care | Biotech & Pharma              | 2020/12/22 |
| 246 | Valued Relationships              | 1989                  | USA                    | <a href="https://vricares.com">https://vricares.com</a>                                                               | Health Care | Medical Equipment & Devices   | 2020/12/22 |
| 247 | Philips                           | 1929                  | Spain                  | <a href="http://www.philips.es/">http://www.philips.es/</a>                                                           | Health Care | Medical Equipment & Devices   | 2020/12/22 |
| 248 | Tonghua Dongbao<br>Pharmaceutical | 1985                  | China                  | <a href="http://www.thdb.com/">http://www.thdb.com/</a>                                                               | Health Care | Biotech & Pharma              | 2020/12/22 |
| 249 | Terumo                            | 1921                  | Japan                  | <a href="http://www.terumo.co.jp/">http://www.terumo.co.jp/</a>                                                       | Health Care | Medical Equipment & Devices   | 2020/12/22 |

| #   | Company name             | Year of establishment | Country of headquarter | Company homepage                                                                                                                                                                                                                                                            | Sector      | Industry         | Accessed   |
|-----|--------------------------|-----------------------|------------------------|-----------------------------------------------------------------------------------------------------------------------------------------------------------------------------------------------------------------------------------------------------------------------------|-------------|------------------|------------|
| 250 | AstraZeneca              | 1999                  | UK                     | <a href="http://www.astrazeneca.com/">http://www.astrazeneca.com/</a>                                                                                                                                                                                                       | Health Care | Biotech & Pharma | 2020/12/22 |
| 251 | Cilag GmbH International | 1984                  | Switzerland            | <a href="http://www.cilag.ch">www.cilag.ch</a>                                                                                                                                                                                                                              | Health Care | Biotech & Pharma | 2020/12/22 |
| 252 | PharmAccess              | 2001                  | Netherland             | <a href="http://www.pharmaccess.org/">http://www.pharmaccess.org/</a>                                                                                                                                                                                                       | Other       | Other            | 2020/12/24 |
| 253 | Gubra                    | 2008                  | Denmark                | <a href="https://www.gubra.dk/">https://www.gubra.dk/</a>                                                                                                                                                                                                                   | Other       | Other            | 2020/12/24 |
| 254 | CarePay                  | 2015                  | Kenya                  | <a href="https://www.carepay.com">https://www.carepay.com</a>                                                                                                                                                                                                               | Other       | Other            | 2020/12/24 |
| 255 | FDA                      |                       | USA                    | <a href="https://www.fda.gov/medical-devices/digital-health-center-excellence/digital-health-software-precertification-pre-cert-program">https://www.fda.gov/medical-devices/digital-health-center-excellence/digital-health-software-precertification-pre-cert-program</a> | Government  | National         | 2020/12/22 |

**Table A2: List of contracts in diabetes digital health**

*Note; The # in the column to the left of the company name and the # in the column to the left of the partner company name correspond to the company's # in Supplementary table 1, respectively.*

| # | Company name | #  | Partner company name | Contract style       | Purpose of contract                                                                                                | Year of start | Year of end | Link of press release                                                                                                                                                                                                                                                                                                                                                         | Accessed  |
|---|--------------|----|----------------------|----------------------|--------------------------------------------------------------------------------------------------------------------|---------------|-------------|-------------------------------------------------------------------------------------------------------------------------------------------------------------------------------------------------------------------------------------------------------------------------------------------------------------------------------------------------------------------------------|-----------|
| 1 | LifeScan     | 42 | Noom                 | R&D Collaboration    | Pilot program integrating its OneTouch Reveal® app with Noom's digital diabetes and weight loss management program | 2020          |             | <a href="https://www.lifescan.com/news-and-updates/2020-press-releases/noom-to-launch-digital-diabetes-and-weight-loss">https://www.lifescan.com/news-and-updates/2020-press-releases/noom-to-launch-digital-diabetes-and-weight-loss</a>                                                                                                                                     | 2020/8/14 |
| 1 | LifeScan     | 58 | Willis Towers Watson | Expansion            | Expansion of the adoption of OneTouch Reveal® Plus                                                                 | 2019          |             | <a href="https://www.lifescan.com/news-and-updates/2019-press-releases/lifescan-willis-towers-watson-collaboration">https://www.lifescan.com/news-and-updates/2019-press-releases/lifescan-willis-towers-watson-collaboration</a>                                                                                                                                             | 2020/8/14 |
| 1 | LifeScan     | 59 | Sanvita Medical      | Commercial agreement | To Market and Distribute Continuous Glucose Monitoring (CGM) Devices                                               | 2019          |             | <a href="https://www.lifescan.com/news-and-updates/2019-press-releases/lifescan-partners-with-sanvita-medical">https://www.lifescan.com/news-and-updates/2019-press-releases/lifescan-partners-with-sanvita-medical</a>                                                                                                                                                       | 2020/8/14 |
| 1 | LifeScan     | 29 | Welldoc              | R&D Collaboration    | To create a comprehensive, real-time, personalized approach for the management of Type 2 diabetes.                 | 2016          |             | <a href="https://www.welldoc.com/news/welldoc-announces-strategic-collaboration-with-lifescan-to-deliver-best-in-class-digital-health-solution-for-patients-living-with-type-2-diabetes/">https://www.welldoc.com/news/welldoc-announces-strategic-collaboration-with-lifescan-to-deliver-best-in-class-digital-health-solution-for-patients-living-with-type-2-diabetes/</a> | 2020/8/14 |

| # | Company name      | #   | Partner company name | Contract style       | Purpose of contract                                                                                                                                                                                     | Year of start | Year of end | Link of press release                                                                                                                                                                                                                                                                                                                                                                                                                                             | Accessed  |
|---|-------------------|-----|----------------------|----------------------|---------------------------------------------------------------------------------------------------------------------------------------------------------------------------------------------------------|---------------|-------------|-------------------------------------------------------------------------------------------------------------------------------------------------------------------------------------------------------------------------------------------------------------------------------------------------------------------------------------------------------------------------------------------------------------------------------------------------------------------|-----------|
| 1 | LifeScan          | 29  | Welldoc              | Commercial agreement | To deliver across the United States a best-in-class digital health solution for Type 2 diabetes.<br>To create a comprehensive, data-driven and payer-reimbursed program for Type 2 diabetes management. | 2016          |             | <a href="https://www.welldoc.com/news/welldoc-announces-agreement-with-lifescan-inc-a-johnson-johnson-diabetes-care-company-to-finalize-commercial-partnership-to-deliver-combined-best-in-class-digital-therapeutic-solution-for/">https://www.welldoc.com/news/welldoc-announces-agreement-with-lifescan-inc-a-johnson-johnson-diabetes-care-company-to-finalize-commercial-partnership-to-deliver-combined-best-in-class-digital-therapeutic-solution-for/</a> | 2020/8/14 |
| 1 | LifeScan          | 60  | Johnson & Johnson    | M&A                  |                                                                                                                                                                                                         | 1986          | 2018        | <a href="https://www.platinumequity.com/news/news-articles/2018/platinum-equity-completes-2-1-billion-acquisition">https://www.platinumequity.com/news/news-articles/2018/platinum-equity-completes-2-1-billion-acquisition</a>                                                                                                                                                                                                                                   | 2020/8/14 |
| 1 | LifeScan          | 61  | Platinum Equity      | M&A                  |                                                                                                                                                                                                         | 2018          |             | <a href="https://www.platinumequity.com/news/news-articles/2018/platinum-equity-completes-2-1-billion-acquisition">https://www.platinumequity.com/news/news-articles/2018/platinum-equity-completes-2-1-billion-acquisition</a>                                                                                                                                                                                                                                   | 2020/8/14 |
| 2 | Hoffmann-La Roche | 17  | mySugr               | M&A                  | To form a leading open platform for digital diabetes management                                                                                                                                         | 2017          |             | <a href="https://www.roche.com/media/releases/med-cor-2017-06-30.htm">https://www.roche.com/media/releases/med-cor-2017-06-30.htm</a>                                                                                                                                                                                                                                                                                                                             | 2020/8/14 |
| 2 | Hoffmann-La Roche | 136 | Care Innovations     | R&D Collaboration    | To enable health insurances and care providers to offer high quality therapy management for people with diabetes via remote care delivery.                                                              | 2018          |             | <a href="https://www.mysugr.com/static/assets/downloads/press_releases/press_release_mysugr_ci.pdf">https://www.mysugr.com/static/assets/downloads/press_releases/press_release_mysugr_ci.pdf</a>                                                                                                                                                                                                                                                                 | 2020/8/14 |

| # | Company name      | #  | Partner company name     | Contract style      | Purpose of contract                                                                                                                                                        | Year of start | Year of end | Link of press release                                                                                                                                                                                                                                                       | Accessed  |
|---|-------------------|----|--------------------------|---------------------|----------------------------------------------------------------------------------------------------------------------------------------------------------------------------|---------------|-------------|-----------------------------------------------------------------------------------------------------------------------------------------------------------------------------------------------------------------------------------------------------------------------------|-----------|
| 2 | Hoffmann-La Roche | 62 | GE Healthcare            | R&D Collaboration   | To develop integrated digital diagnostics platform to improve oncology and critical care treatment                                                                         | 2018          |             | <a href="https://www.roche.com/media/releases/med-cor-2018-01-08.htm">https://www.roche.com/media/releases/med-cor-2018-01-08.htm</a>                                                                                                                                       | 2020/8/14 |
| 2 | Hoffmann-La Roche | 63 | Viewics                  | M&A                 | To provide data-driven lab business analytics and add further digital capabilities along the laboratory value chain                                                        | 2017          |             | <a href="https://www.roche.com/media/releases/med-cor-2017-11-17b.htm">https://www.roche.com/media/releases/med-cor-2017-11-17b.htm</a>                                                                                                                                     | 2020/8/14 |
| 2 | Hoffmann-La Roche | 64 | Qualcomm Life            | R&D Collaboration   | To advance chronic care management using connected therapy to further improve therapy quality, increase convenience and drive patient engagement in managing their health. | 2015          |             | <a href="https://www.roche.com/media/releases/med-cor-2015-01-29t.htm">https://www.roche.com/media/releases/med-cor-2015-01-29t.htm</a>                                                                                                                                     | 2020/8/14 |
| 3 | Medtronic         | 65 | Blackstone Life Sciences | Financial agreement | Advancing new, innovative products especially designed to reduce the burden of diabetes management.                                                                        | 2020          |             | <a href="http://newsroom.medtronic.com/news-releases/news-release-details/medtronic-announces-337-million-product-investment-blackstone">http://newsroom.medtronic.com/news-releases/news-release-details/medtronic-announces-337-million-product-investment-blackstone</a> | 2020/8/14 |
| 3 | Medtronic         | 66 | Klue                     | M&A                 | To Strengthen Development of Personalized Closed Loop Technology for Diabetes Management                                                                                   | 2019          |             | <a href="http://newsroom.medtronic.com/news-releases/news-release-details/medtronic-acquires-klue">http://newsroom.medtronic.com/news-releases/news-release-details/medtronic-acquires-klue</a>                                                                             | 2020/8/14 |

| # | Company name | #  | Partner company name | Contract style    | Purpose of contract                                                                                                                                                                                                                 | Year of start | Year of end | Link of press release                                                                                                                                                                                                                                                           | Accessed  |
|---|--------------|----|----------------------|-------------------|-------------------------------------------------------------------------------------------------------------------------------------------------------------------------------------------------------------------------------------|---------------|-------------|---------------------------------------------------------------------------------------------------------------------------------------------------------------------------------------------------------------------------------------------------------------------------------|-----------|
| 3 | Medtronic    | 67 | ChristianaCare       | Expansion         | To improve patient outcomes while reducing the cost of care.                                                                                                                                                                        | 2019          |             | <a href="http://newsroom.medtronic.com/news-releases/news-release-details/medtronic-and-christianacare-collaborate-improve-patient">http://newsroom.medtronic.com/news-releases/news-release-details/medtronic-and-christianacare-collaborate-improve-patient</a>               | 2020/8/14 |
| 3 | Medtronic    | 12 | Novo Nordisk         | R&D Collaboration | To develop solutions enabling dosing data from Novo Nordisk Smart Insulin Pens to be shared with Medtronic CGM Devices                                                                                                              | 2019          |             | <a href="http://newsroom.medtronic.com/news-releases/news-release-details/medtronic-and-novo-nordisk-enter-agreement-provide-integrated">http://newsroom.medtronic.com/news-releases/news-release-details/medtronic-and-novo-nordisk-enter-agreement-provide-integrated</a>     | 2020/8/14 |
| 3 | Medtronic    | 23 | fitbit               | R&D Collaboration | To integrate health and activity tracking for patients living with diabetes and their physicians and care teams                                                                                                                     | 2016          |             | <a href="http://newsroom.medtronic.com/news-releases/news-release-details/medtronic-and-fitbit-partner-integrate-health-and-activity-data">http://newsroom.medtronic.com/news-releases/news-release-details/medtronic-and-fitbit-partner-integrate-health-and-activity-data</a> | 2020/8/14 |
| 3 | Medtronic    | 25 | Samsung              | R&D Collaboration | To develop a range of future solutions that will enhance the way people with diabetes live their lives, from remotely viewing diabetes data to ultimately integrating mobile and wearable devices into diabetes management systems. | 2015          |             | <a href="http://newsroom.medtronic.com/news-releases/news-release-details/medtronic-and-samsung-partner-enhance-diabetes-management-and">http://newsroom.medtronic.com/news-releases/news-release-details/medtronic-and-samsung-partner-enhance-diabetes-management-and</a>     | 2020/8/14 |

| # | Company name | #  | Partner company name                                   | Contract style       | Purpose of contract                                                                                                                                                                                                           | Year of start | Year of end | Link of press release                                                                                                                                                                                                                                                         | Accessed  |
|---|--------------|----|--------------------------------------------------------|----------------------|-------------------------------------------------------------------------------------------------------------------------------------------------------------------------------------------------------------------------------|---------------|-------------|-------------------------------------------------------------------------------------------------------------------------------------------------------------------------------------------------------------------------------------------------------------------------------|-----------|
| 3 | Medtronic    | 64 | Qualcomm Life                                          | R&D Collaboration    | To jointly develop future generation CGM systems that aim to improve health outcomes for people with diabetes.                                                                                                                | 2016          |             | <a href="http://newsroom.medtronic.com/news-releases/news-release-details/medtronic-and-qualcomm-collaborate-aim-improve-care-and-health">http://newsroom.medtronic.com/news-releases/news-release-details/medtronic-and-qualcomm-collaborate-aim-improve-care-and-health</a> | 2020/8/14 |
| 3 | Medtronic    | 5  | Tandem Diabetes Care                                   | Patent cross-license | Both companies to focus on helping people with diabetes through innovation of future products and services, while avoiding the distraction of potential legal disagreements.                                                  | 2020          |             | <a href="http://newsroom.medtronic.com/news-releases/news-release-details/medtronic-and-tandem-diabetes-care-enter-patent-cross-license">http://newsroom.medtronic.com/news-releases/news-release-details/medtronic-and-tandem-diabetes-care-enter-patent-cross-license</a>   | 2020/8/14 |
| 3 | Medtronic    | 68 | Capital District Physicians' Health Plan, Inc. (CDPHP) | Expansion            | To incorporate patient engagement program aimed at improving diabetes management                                                                                                                                              | 2019          |             | <a href="http://newsroom.medtronic.com/news-releases/news-release-details/medtronic-partners-capital-district-physicians-health-plan-inc">http://newsroom.medtronic.com/news-releases/news-release-details/medtronic-partners-capital-district-physicians-health-plan-inc</a> | 2020/8/14 |
| 3 | Medtronic    | 69 | Tidepool                                               | R&D Collaboration    | To develop a future Bluetooth-enabled MiniMed(TM) pump that would be compatible with Tidepool Loop, a future FDA-regulated, open source automated insulin delivery app for iPhone® and Apple Watch® currently in development. | 2019          |             | <a href="http://newsroom.medtronic.com/news-releases/news-release-details/medtronic-and-tidepool-work-together-interoperable-automated">http://newsroom.medtronic.com/news-releases/news-release-details/medtronic-and-tidepool-work-together-interoperable-automated</a>     | 2020/8/14 |

| # | Company name | #  | Partner company name       | Contract style | Purpose of contract                                                                                                                                                                                                                                                  | Year of start | Year of end | Link of press release                                                                                                                                                                                                                                                       | Accessed  |
|---|--------------|----|----------------------------|----------------|----------------------------------------------------------------------------------------------------------------------------------------------------------------------------------------------------------------------------------------------------------------------|---------------|-------------|-----------------------------------------------------------------------------------------------------------------------------------------------------------------------------------------------------------------------------------------------------------------------------|-----------|
| 3 | Medtronic    | 70 | Blue Cross and Blue Shield | Expansion      | To improve care for those living with diabetes and ensure that patients have the support they need to reach their best possible outcomes.                                                                                                                            | 2019          |             | <a href="http://newsroom.medtronic.com/news-releases/news-release-details/new-value-based-agreement-between-blue-cross-and-blue-shield">http://newsroom.medtronic.com/news-releases/news-release-details/new-value-based-agreement-between-blue-cross-and-blue-shield</a>   | 2020/8/14 |
| 3 | Medtronic    | 71 | Nutrino Health             | M&A            | To improve clinical outcomes for people with diabetes by integrating Nutrino's extensive food analysis infrastructure, nutrition science expertise and artificial intelligence (AI)-driven personalized insights with Medtronic's technology and future innovations. | 2018          |             | <a href="http://newsroom.medtronic.com/news-releases/news-release-details/medtronic-acquire-nutrino-health">http://newsroom.medtronic.com/news-releases/news-release-details/medtronic-acquire-nutrino-health</a>                                                           | 2020/8/14 |
| 3 | Medtronic    | 72 | Diabeter                   | M&A            | To create a strong local and international platform for improving outcomes for people with diabetes.                                                                                                                                                                 | 2015          |             | <a href="http://newsroom.medtronic.com/news-releases/news-release-details/medtronic-acquires-diabeter-innovative-diabetes-care-provider">http://newsroom.medtronic.com/news-releases/news-release-details/medtronic-acquires-diabeter-innovative-diabetes-care-provider</a> | 2020/8/14 |

| # | Company name | #  | Partner company name | Contract style       | Purpose of contract                                                                                                                                                                                                                                                                                       | Year of start | Year of end | Link of press release                                                                                                                                                                                                                                                           | Accessed  |
|---|--------------|----|----------------------|----------------------|-----------------------------------------------------------------------------------------------------------------------------------------------------------------------------------------------------------------------------------------------------------------------------------------------------------|---------------|-------------|---------------------------------------------------------------------------------------------------------------------------------------------------------------------------------------------------------------------------------------------------------------------------------|-----------|
| 3 | Medtronic    | 26 | IBM Watson Health    | R&D Collaboration    | To develop diabetes care management solutions that will optimize patient outcomes and health economics.<br>to develop near real-time, dynamic personalized care plans that provide decision support for health care providers and their patients with the goal of improving care efficiency and outcomes. | 2015          |             | <a href="http://newsroom.medtronic.com/news-releases/news-release-details/ibm-and-medtronic-partner-improve-diabetes-care">http://newsroom.medtronic.com/news-releases/news-release-details/ibm-and-medtronic-partner-improve-diabetes-care</a>                                 | 2020/8/14 |
| 3 | Medtronic    | 37 | Glooko               | R&D Collaboration    | To provide people with diabetes, their care teams and healthcare providers with greater insights to improve care                                                                                                                                                                                          | 2015          |             | <a href="http://newsroom.medtronic.com/news-releases/news-release-details/medtronic-expands-access-diabetes-device-data-through-agreement">http://newsroom.medtronic.com/news-releases/news-release-details/medtronic-expands-access-diabetes-device-data-through-agreement</a> | 2020/8/14 |
| 3 | Medtronic    | 73 | Henry Schein         | Commercial agreement | Broadens access to Medtronic solutions for people with type 2 diabetes under the care of primary care physicians who oversee their diabetes management.                                                                                                                                                   | 2015          |             | <a href="http://newsroom.medtronic.com/news-releases/news-release-details/medtronic-expands-access-type-2-diabetes-products-selection">http://newsroom.medtronic.com/news-releases/news-release-details/medtronic-expands-access-type-2-diabetes-products-selection</a>         | 2020/8/14 |

| # | Company name | #  | Partner company name           | Contract style    | Purpose of contract                                                                                                                                                                                                | Year of start | Year of end | Link of press release                                                                                                                                                                                                                                                             | Accessed  |
|---|--------------|----|--------------------------------|-------------------|--------------------------------------------------------------------------------------------------------------------------------------------------------------------------------------------------------------------|---------------|-------------|-----------------------------------------------------------------------------------------------------------------------------------------------------------------------------------------------------------------------------------------------------------------------------------|-----------|
| 3 | Medtronic    | 74 | BD                             | R&D Collaboration | To address unmet needs and improve infusion set options for people with diabetes using insulin pumps.                                                                                                              | 2015          |             | <a href="http://newsroom.medtronic.com/news-releases/news-release-details/bd-and-medtronic-collaborate-introduce-new-infusion-set-bd">http://newsroom.medtronic.com/news-releases/news-release-details/bd-and-medtronic-collaborate-introduce-new-infusion-set-bd</a>             | 2020/8/14 |
| 3 | Medtronic    | 75 | Aetna                          | Expansion         | To improve patients' quality of life and enhance support for doctors to help create more value in the health care system                                                                                           | 2014          |             | <a href="http://newsroom.medtronic.com/news-releases/news-release-details/aetna-and-medtronic-collaborate-help-members-take-better-control">http://newsroom.medtronic.com/news-releases/news-release-details/aetna-and-medtronic-collaborate-help-members-take-better-control</a> | 2020/8/14 |
| 3 | Medtronic    | 76 | Sanofi                         | R&D Collaboration | To develop drug-device combinations and to deliver care management services to improve adherence, simplify insulin treatment, and help people with diabetes better manage their condition.                         | 2014          |             | <a href="http://newsroom.medtronic.com/news-releases/news-release-details/sanofi-and-medtronic-form-strategic-alliance-diabetes-improve">http://newsroom.medtronic.com/news-releases/news-release-details/sanofi-and-medtronic-form-strategic-alliance-diabetes-improve</a>       | 2020/8/14 |
| 3 | Medtronic    | 77 | National Institute of Hospital | Expansion         | To gather insight that can support the foundation of a Chinese nationwide system to improve the treatment of Type 1 diabetes patients and reduce the likelihood of complications among this vulnerable population. | 2013          |             | <a href="http://newsroom.medtronic.com/news-releases/news-release-details/medtronic-partners-national-institute-hospital-administration">http://newsroom.medtronic.com/news-releases/news-release-details/medtronic-partners-national-institute-hospital-administration</a>       | 2020/8/14 |

| # | Company name           | #  | Partner company name   | Contract style       | Purpose of contract                                                                                                                                                                  | Year of start | Year of end | Link of press release                                                                                                                                                                                                                                                     | Accessed  |
|---|------------------------|----|------------------------|----------------------|--------------------------------------------------------------------------------------------------------------------------------------------------------------------------------------|---------------|-------------|---------------------------------------------------------------------------------------------------------------------------------------------------------------------------------------------------------------------------------------------------------------------------|-----------|
| 3 | Medtronic              | 78 | Bayer                  | R&D Collaboration    | To develop innovative next generation diabetes management solutions for patients, state-of-the-art, wireless blood glucose meters worldwide.                                         | 2011          |             | <a href="http://newsroom.medtronic.com/news-releases/news-release-details/medtronic-and-bayer-healthcare-expand-international-alliance">http://newsroom.medtronic.com/news-releases/news-release-details/medtronic-and-bayer-healthcare-expand-international-alliance</a> | 2020/8/14 |
| 3 | Medtronic              | 78 | Bayer                  | R&D Collaboration    | To develop innovative next generation diabetes management solutions for patients, state-of-the-art, wireless blood glucose meters worldwide.                                         | 2007          |             | <a href="http://newsroom.medtronic.com/news-releases/news-release-details/medtronic-and-bayer-healthcare-expand-international-alliance">http://newsroom.medtronic.com/news-releases/news-release-details/medtronic-and-bayer-healthcare-expand-international-alliance</a> | 2020/8/14 |
| 3 | Medtronic              | 4  | Ascensia Diabetes Care | R&D Collaboration    | To develop and market innovative diabetes management solutions for patients worldwide.                                                                                               | 2016          |             | <a href="https://www.ascensia.com/press/press-releases/press-release/?id=0a22da0a-f030-4235-a779-aaf3dc0f4ec1">https://www.ascensia.com/press/press-releases/press-release/?id=0a22da0a-f030-4235-a779-aaf3dc0f4ec1</a>                                                   | 2020/8/14 |
| 4 | Ascensia Diabetes Care | 21 | Senseonics             | Commercial agreement | Marketing and sales activities of the Eversense product in the coming months, in collaboration with Senseonics, and will take over full responsibility in the first quarter of 2021. | 2020          |             | <a href="https://www.ascensia.com/press/press-releases/press-release/?id=20c0fc6a-c62e-404a-8985-5aadb94c3270">https://www.ascensia.com/press/press-releases/press-release/?id=20c0fc6a-c62e-404a-8985-5aadb94c3270</a>                                                   | 2020/8/14 |

| # | Company name           | #  | Partner company name | Contract style       | Purpose of contract                                                                                                                                                                                                                                                                                        | Year of start | Year of end | Link of press release                                                                                                                                                                                                   | Accessed  |
|---|------------------------|----|----------------------|----------------------|------------------------------------------------------------------------------------------------------------------------------------------------------------------------------------------------------------------------------------------------------------------------------------------------------------|---------------|-------------|-------------------------------------------------------------------------------------------------------------------------------------------------------------------------------------------------------------------------|-----------|
| 4 | Ascensia Diabetes Care | 21 | Senseonics           | Financial agreement  | To made an initial strategic investment of USD \$35 million into Senseonics in the form of a convertible debt securities. In addition, a further USD \$15 million investment will be provided in exchange for Senseonics convertible preferred equity, upon FDA approval of the 180-day Eversense product. | 2020          |             | <a href="https://www.ascensia.com/press/press-releases/press-release/?id=20c0fc6a-c62e-404a-8985-5aadb94c3270">https://www.ascensia.com/press/press-releases/press-release/?id=20c0fc6a-c62e-404a-8985-5aadb94c3270</a> | 2020/8/14 |
| 4 | Ascensia Diabetes Care | 80 | POCTech              | R&D Collaboration    | To co-develop next-generation products that build on POCTech' s existing technology.                                                                                                                                                                                                                       | 2019          |             | <a href="https://www.ascensia.com/press/press-releases/press-release/?id=ec054892-46d9-4165-a969-8e70280b9c18">https://www.ascensia.com/press/press-releases/press-release/?id=ec054892-46d9-4165-a969-8e70280b9c18</a> | 2020/8/14 |
| 4 | Ascensia Diabetes Care | 13 | Insulet              | Commercial agreement | Insulet will distribute the CONTOUR®NEXT ONE BGMS with the Omnipod DASH™ . Recipients of Omnipod DASH™ will receive the CONTOUR®NEXT ONE meter and CONTOUR®NEXT test strips packaged with their insulin pump.                                                                                              | 2018          |             | <a href="https://www.ascensia.com/press/press-releases/press-release/?id=1536a056-c933-46e5-8948-8a89b040ffd0">https://www.ascensia.com/press/press-releases/press-release/?id=1536a056-c933-46e5-8948-8a89b040ffd0</a> | 2020/8/14 |
| 4 | Ascensia Diabetes Care | 13 | Insulet              | R&D Collaboration    | To connect its CONTOUR®NEXT ONE blood glucose monitoring system (BGMS) with Insulet' s next-generation Omnipod System (Omnipod DASH)                                                                                                                                                                       | 2017          |             | <a href="https://www.ascensia.com/press/press-releases/press-release/?id=9981b823-effc-46ea-b0b2-7edc49c58f00">https://www.ascensia.com/press/press-releases/press-release/?id=9981b823-effc-46ea-b0b2-7edc49c58f00</a> | 2020/8/14 |

| # | Company name           | #  | Partner company name | Contract style    | Purpose of contract                                                                                                                                                                                              | Year of start | Year of end | Link of press release                                                                                                                                                                                                   | Accessed  |
|---|------------------------|----|----------------------|-------------------|------------------------------------------------------------------------------------------------------------------------------------------------------------------------------------------------------------------|---------------|-------------|-------------------------------------------------------------------------------------------------------------------------------------------------------------------------------------------------------------------------|-----------|
| 4 | Ascensia Diabetes Care | 9  | Health2Sync          | R&D Collaboration | To improve diabetes care by bringing an integrated digital management solution to patients in Asia.                                                                                                              | 2017          |             | <a href="https://www.ascensia.com/press/press-releases/press-release/?id=fc58d288-8633-48d3-aa20-139fa57b431b">https://www.ascensia.com/press/press-releases/press-release/?id=fc58d288-8633-48d3-aa20-139fa57b431b</a> | 2020/8/14 |
| 4 | Ascensia Diabetes Care | 82 | Quattro Folia        | R&D Collaboration | To optimize insulin management for patients                                                                                                                                                                      | 2017          |             | <a href="https://www.ascensia.com/press/press-releases/press-release/?id=921947c8-c56f-4c3b-blcc-f5b485f556f6">https://www.ascensia.com/press/press-releases/press-release/?id=921947c8-c56f-4c3b-blcc-f5b485f556f6</a> | 2020/8/14 |
| 4 | Ascensia Diabetes Care | 83 | Voluntis             | R&D Collaboration | To empower self-management for patients and help optimize insulin management in the real-world to improve outcomes.                                                                                              | 2017          |             | <a href="https://www.ascensia.com/press/press-releases/press-release/?id=989a6263-479e-4591-9a04-19322491278e">https://www.ascensia.com/press/press-releases/press-release/?id=989a6263-479e-4591-9a04-19322491278e</a> | 2020/8/14 |
| 4 | Ascensia Diabetes Care | 37 | Glooko               | R&D Collaboration | To allow people with diabetes and health care professionals to access and analyze highly accurate blood glucose data at home, on the move and during office visits through the digital platform of their choice. | 2017          |             | <a href="https://www.ascensia.com/press/press-releases/press-release/?id=3132d5b0-32bf-44d5-814b-55a1bb68bed6">https://www.ascensia.com/press/press-releases/press-release/?id=3132d5b0-32bf-44d5-814b-55a1bb68bed6</a> | 2020/8/14 |
| 4 | Ascensia Diabetes Care | 6  | Dexcom Inc.          | R&D Collaboration | To provide the highly accurate Ascensia CONTOUR®NEXT ONE blood glucose monitoring system (BGMS) as part of the Dexcom G5® CGM System Medicare offering.                                                          | 2017          |             | <a href="https://provider.dexcom.com/industry-news/dexcom-partners-ascensia-diabetes-care-medicare-offering">https://provider.dexcom.com/industry-news/dexcom-partners-ascensia-diabetes-care-medicare-offering</a>     | 2020/8/14 |

| # | Company name           | #  | Partner company name                  | Contract style       | Purpose of contract                                                                                                                       | Year of start | Year of end | Link of press release                                                                                                                                                                                                                                                                   | Accessed  |
|---|------------------------|----|---------------------------------------|----------------------|-------------------------------------------------------------------------------------------------------------------------------------------|---------------|-------------|-----------------------------------------------------------------------------------------------------------------------------------------------------------------------------------------------------------------------------------------------------------------------------------------|-----------|
| 4 | Ascensia Diabetes Care | 84 | myDiabby                              | R&D Collaboration    | To connect to the CONTOUR®NEXT ONE blood glucose monitoring system via Bluetooth.                                                         | 2017          |             | <a href="https://www.ascensia.com/Partners/">https://www.ascensia.com/Partners/</a>                                                                                                                                                                                                     | 2020/8/14 |
| 5 | Tandem Diabetes Care   | 11 | Abbott                                | R&D Collaboration    | To develop and commercialize integrated diabetes solutions to provide more options for people to manage their diabetes.                   | 2020          |             | <a href="http://investor.tandemdiabetes.com/news-releases/news-release-details/abbott-and-tandem-diabetes-care-advance-development-integrated">http://investor.tandemdiabetes.com/news-releases/news-release-details/abbott-and-tandem-diabetes-care-advance-development-integrated</a> | 2020/8/15 |
| 5 | Tandem Diabetes Care   | 85 | Rubin Medical                         | Commercial agreement | To commercialize Tandem's t:slim X2™ Insulin Pump, insulin cartridges, and t:lock™ family of Infusion Sets in Sweden, Norway and Denmark. | 2018          |             | <a href="http://investor.tandemdiabetes.com/static-files/20f41d55-e3f1-457c-b70c-44a9fb204e85">http://investor.tandemdiabetes.com/static-files/20f41d55-e3f1-457c-b70c-44a9fb204e85</a>                                                                                                 | 2020/8/15 |
| 5 | Tandem Diabetes Care   | 86 | Australasian Medical & Scientific Ltd | Commercial agreement | To commercialize Tandem's t:slim X2™ Insulin Pump in Australia                                                                            | 2018          |             | <a href="http://investor.tandemdiabetes.com/news-releases/news-release-details/tandem-diabetes-care-announces-agreements-distribution-insulin">http://investor.tandemdiabetes.com/news-releases/news-release-details/tandem-diabetes-care-announces-agreements-distribution-insulin</a> | 2020/8/15 |
| 5 | Tandem Diabetes Care   | 87 | New Zealand Medical & Scientific Ltd  | Commercial agreement | To commercialize Tandem's t:slim X2™ Insulin Pump in New Zealand                                                                          | 2018          |             | <a href="http://investor.tandemdiabetes.com/news-releases/news-release-details/tandem-diabetes-care-announces-agreements-distribution-insulin">http://investor.tandemdiabetes.com/news-releases/news-release-details/tandem-diabetes-care-announces-agreements-distribution-insulin</a> | 2020/8/15 |

| # | Company name         | #  | Partner company name  | Contract style       | Purpose of contract                                                                                                                         | Year of start | Year of end | Link of press release                                                                                                                                                                                                                                                                     | Accessed  |
|---|----------------------|----|-----------------------|----------------------|---------------------------------------------------------------------------------------------------------------------------------------------|---------------|-------------|-------------------------------------------------------------------------------------------------------------------------------------------------------------------------------------------------------------------------------------------------------------------------------------------|-----------|
| 5 | Tandem Diabetes Care | 88 | Movi SpA              | Commercial agreement | To commercialize Tandem's t:slim X2™ Insulin Pump in Italy.                                                                                 | 2018          |             | <a href="http://investor.tandemdiabetes.com/news-releases/news-release-details/tandem-diabetes-care-and-movi-spa-announce-agreement">http://investor.tandemdiabetes.com/news-releases/news-release-details/tandem-diabetes-care-and-movi-spa-announce-agreement</a>                       | 2020/8/15 |
| 5 | Tandem Diabetes Care | 89 | TypeZero Technologies | R&D Collaboration    | To work together closely to expedite the clinical research associated with the development of Tandem's closed-loop AP system.               | 2016          |             | <a href="http://investor.tandemdiabetes.com/news-releases/news-release-details/tandem-diabetes-care-and-typezero-technologies-announce-license">http://investor.tandemdiabetes.com/news-releases/news-release-details/tandem-diabetes-care-and-typezero-technologies-announce-license</a> | 2020/8/15 |
| 5 | Tandem Diabetes Care | 6  | Dexcom Inc.           | R&D Collaboration    | To allow the integration of future generation Tandem insulin pumps with the Dexcom G5 and G6 continuous glucose monitoring ("CGM") systems. | 2015          |             | <a href="http://investor.tandemdiabetes.com/news-releases/news-release-details/tandem-diabetes-care-announces-development-agreement-dexcom">http://investor.tandemdiabetes.com/news-releases/news-release-details/tandem-diabetes-care-announces-development-agreement-dexcom</a>         | 2020/8/15 |
| 5 | Tandem Diabetes Care | 6  | Dexcom Inc.           | R&D Collaboration    | To develop Dexcom's newest continuous glucose monitoring system, the G4™ PLATINUM.                                                          | 2013          |             | <a href="http://investor.tandemdiabetes.com/news-releases/news-release-details/tandem-diabetes-care-and-dexcom-expand-development-and">http://investor.tandemdiabetes.com/news-releases/news-release-details/tandem-diabetes-care-and-dexcom-expand-development-and</a>                   | 2020/8/15 |

| # | Company name         | #  | Partner company name | Contract style    | Purpose of contract                                                                                                                                                                                       | Year of start | Year of end | Link of press release                                                                                                                                                                                                                                                                 | Accessed  |
|---|----------------------|----|----------------------|-------------------|-----------------------------------------------------------------------------------------------------------------------------------------------------------------------------------------------------------|---------------|-------------|---------------------------------------------------------------------------------------------------------------------------------------------------------------------------------------------------------------------------------------------------------------------------------------|-----------|
| 5 | Tandem Diabetes Care | 6  | Dexcom Inc.          | R&D Collaboration | To integrate DexCom' s next generation continuous glucose monitoring (CGM) system with Tandem' s t:slim™ Insulin Delivery System, the first ever touch-screen insulin pump.                               | 2012          |             | <a href="http://investor.tandemdiabetes.com/news-releases/news-release-details/dexcom-and-tandem-diabetes-care-announce-cgm-development-and">http://investor.tandemdiabetes.com/news-releases/news-release-details/dexcom-and-tandem-diabetes-care-announce-cgm-development-and</a>   | 2020/8/15 |
| 5 | Tandem Diabetes Care | 90 | Diasend              | R&D Collaboration | The t:slim Pump is now compatible with diasend® Clinic, a web-based diabetes data management tool developed by Diasend.                                                                                   | 2014          |             | <a href="http://investor.tandemdiabetes.com/news-releases/news-release-details/tandem-diabetes-care-expands-diabetes-data-management-access">http://investor.tandemdiabetes.com/news-releases/news-release-details/tandem-diabetes-care-expands-diabetes-data-management-access</a>   | 2020/8/15 |
| 5 | Tandem Diabetes Care | 69 | Tidepool             | R&D Collaboration | To complement t:connect® Diabetes Management Application and diasend® Clinic offerings, and will further enhance our customers' options for displaying data to manage their therapy with the t:slim Pump. | 2014          |             | <a href="http://investor.tandemdiabetes.com/news-releases/news-release-details/tandem-diabetes-care-announces-partnership-tidepool-further">http://investor.tandemdiabetes.com/news-releases/news-release-details/tandem-diabetes-care-announces-partnership-tidepool-further</a>     | 2020/8/15 |
| 5 | Tandem Diabetes Care | 91 | JDRF                 | R&D Collaboration | To accelerate the development of a next-generation, fully automated artificial pancreas system using therapies in conjunction with insulin.                                                               | 2013          |             | <a href="http://investor.tandemdiabetes.com/news-releases/news-release-details/tandem-diabetes-care-announces-partnership-jdrf-develop-novel">http://investor.tandemdiabetes.com/news-releases/news-release-details/tandem-diabetes-care-announces-partnership-jdrf-develop-novel</a> | 2020/8/15 |

| # | Company name         | #  | Partner company name | Contract style    | Purpose of contract                                                                                                                                                                                                                                                                                  | Year of start | Year of end | Link of press release                                                                                                                                                                                                                                                           | Accessed  |
|---|----------------------|----|----------------------|-------------------|------------------------------------------------------------------------------------------------------------------------------------------------------------------------------------------------------------------------------------------------------------------------------------------------------|---------------|-------------|---------------------------------------------------------------------------------------------------------------------------------------------------------------------------------------------------------------------------------------------------------------------------------|-----------|
| 5 | Tandem Diabetes Care | 92 | Sugarmate            | M&A               | Sugarmate represents an exciting addition to our digital offerings, and supports Tandem's strategic vision to expand our ecosystem of diabetes-related products and services.                                                                                                                        | 2020          |             | <a href="http://investor.tandemdiabetes.com/news-releases/news-release-details/tandem-diabetes-care-acquires-sugarmate-popular-mobile-app">http://investor.tandemdiabetes.com/news-releases/news-release-details/tandem-diabetes-care-acquires-sugarmate-popular-mobile-app</a> | 2020/8/15 |
| 6 | Dexcom Inc.          | 13 | Insulet              | R&D Collaboration | the Omnipod Horizon Automated Insulin Delivery (AID) System will use sensor values from the Dexcom G6 and next generation G7 CGM systems to predict glucose levels into the future and automatically adjust the insulin dose required to help reduce the occurrence of blood glucose highs and lows. | 2020          |             | <a href="https://dexcom.gcs-web.com/node/19291/pdf">https://dexcom.gcs-web.com/node/19291/pdf</a>                                                                                                                                                                               | 2020/8/15 |
| 6 | Dexcom Inc.          | 13 | Insulet              | R&D Collaboration | To integrate DexCom's continuous glucose monitoring technology into the wireless, handheld OmniPod System Personal Diabetes Manager (PDM).                                                                                                                                                           | 2008          |             | <a href="https://dexcom.gcs-web.com/static-files/ccf16d7b-450c-4acd-953d-5025b0574f70">https://dexcom.gcs-web.com/static-files/ccf16d7b-450c-4acd-953d-5025b0574f70</a>                                                                                                         | 2020/8/15 |

| # | Company name | #   | Partner company name | Contract style    | Purpose of contract                                                                                                                                                                                                                           | Year of start | Year of end | Link of press release                                                                                                                                                   | Accessed  |
|---|--------------|-----|----------------------|-------------------|-----------------------------------------------------------------------------------------------------------------------------------------------------------------------------------------------------------------------------------------------|---------------|-------------|-------------------------------------------------------------------------------------------------------------------------------------------------------------------------|-----------|
| 6 | Dexcom Inc.  | 101 | Companion Medical    | R&D Collaboration | To enable health care providers to access a combined, comprehensive view of a patient' s therapy plan, increasing the effectiveness of how and when patients should dose and paving the way for improved and transparent treatment decisions. | 2019          |             | <a href="https://dexcom.gcs-web.com/node/18691/pdf">https://dexcom.gcs-web.com/node/18691/pdf</a>                                                                       | 2020/8/15 |
| 6 | Dexcom Inc.  | 27  | Verily               | R&D Collaboration | To reinforce the companies' mutual product development goals, while expanding options for future collaborations. To accelerate Dexcom' s efforts to advance into the Type 2 diabetes space and improves its future profitability.             | 2018          |             | <a href="https://dexcom.gcs-web.com/node/18086/pdf">https://dexcom.gcs-web.com/node/18086/pdf</a>                                                                       | 2020/8/15 |
| 6 | Dexcom Inc.  | 107 | Eli Lilly            | R&D Collaboration | To combine tools aimed at reducing complexity and burden while improving outcomes in diabetes management                                                                                                                                      | 2017          |             | <a href="https://dexcom.gcs-web.com/static-files/3fc065e3-bda3-4d0e-b8f0-7a51b7f97c6e">https://dexcom.gcs-web.com/static-files/3fc065e3-bda3-4d0e-b8f0-7a51b7f97c6e</a> | 2020/8/15 |
| 6 | Dexcom Inc.  | 108 | Nintamed             | M&A               | To improve access to our leading CGM technologies globally.                                                                                                                                                                                   | 2016          |             | <a href="https://dexcom.gcs-web.com/static-files/f191db7a-0e7f-4fbc-bab0-375b227611f2">https://dexcom.gcs-web.com/static-files/f191db7a-0e7f-4fbc-bab0-375b227611f2</a> | 2020/8/15 |

| # | Company name | #   | Partner company name | Contract style       | Purpose of contract                                                                                                                                                                                                                                                       | Year of start | Year of end | Link of press release                                                                                                                                                   | Accessed  |
|---|--------------|-----|----------------------|----------------------|---------------------------------------------------------------------------------------------------------------------------------------------------------------------------------------------------------------------------------------------------------------------------|---------------|-------------|-------------------------------------------------------------------------------------------------------------------------------------------------------------------------|-----------|
| 6 | Dexcom Inc.  | 39  | Google               | R&D<br>Collaboration | To empower more people to control their diabetes with real-time and actionable information by developing a low-cost, small, bandage-sized sensor that is connected to the cloud.                                                                                          | 2015          |             | <a href="https://dexcom.gcs-web.com/static-files/ab8b9cc3-84d9-4dbb-9b32-84f9a6d3f179">https://dexcom.gcs-web.com/static-files/ab8b9cc3-84d9-4dbb-9b32-84f9a6d3f179</a> | 2020/8/15 |
| 6 | Dexcom Inc.  | 109 | Animas               | R&D<br>Collaboration | Animas will receive an exclusive right to develop and market CGM-enabled ambulatory insulin delivery systems outside the U.S.                                                                                                                                             | 2009          |             | <a href="https://dexcom.gcs-web.com/static-files/6fe52316-fdda-4249-b2f0-f8734f8220fb">https://dexcom.gcs-web.com/static-files/6fe52316-fdda-4249-b2f0-f8734f8220fb</a> | 2020/8/15 |
| 6 | Dexcom Inc.  | 109 | Animas               | R&D<br>Collaboration | Joint development agreement with Animas Corporation to integrate DexCom's continuous glucose monitoring (CGM) technology into Animas® insulin pumps.<br>Animas will contribute up to \$750,000 to DexCom to offset certain development, clinical and regulatory expenses. | 2008          |             | <a href="https://dexcom.gcs-web.com/static-files/49ccc285-4f68-4092-bcca-3feefe3c2c2c">https://dexcom.gcs-web.com/static-files/49ccc285-4f68-4092-bcca-3feefe3c2c2c</a> | 2020/8/15 |

| # | Company name | #   | Partner company name | Contract style    | Purpose of contract                                                                                                                                                           | Year of start | Year of end | Link of press release                                                                                                                                                   | Accessed  |
|---|--------------|-----|----------------------|-------------------|-------------------------------------------------------------------------------------------------------------------------------------------------------------------------------|---------------|-------------|-------------------------------------------------------------------------------------------------------------------------------------------------------------------------|-----------|
| 6 | Dexcom Inc.  | 2   | Hoffmann-La Roche    | R&D Collaboration | To integrate DexCom's next generation continuous glucose monitoring (CGM) system with the next generation of Accu-Chek® insulin delivery systems targeted at the U.S. market. | 2011          |             | <a href="https://dexcom.gcs-web.com/static-files/ce4eab9e-349e-41cf-b531-a48574873b71">https://dexcom.gcs-web.com/static-files/ce4eab9e-349e-41cf-b531-a48574873b71</a> | 2020/8/15 |
| 6 | Dexcom Inc.  | 110 | SweetSpot            | M&A               | To incorporate CGM and insulin data with simplified reporting capabilities and easy, secure data access for patients and their healthcare providers.                          | 2012          |             | <a href="https://dexcom.gcs-web.com/static-files/d2929aa8-98c0-4c6d-b356-7973a5c90dee">https://dexcom.gcs-web.com/static-files/d2929aa8-98c0-4c6d-b356-7973a5c90dee</a> | 2020/8/15 |
| 6 | Dexcom Inc.  | 111 | Edwards Lifesciences | R&D Collaboration | To extend our portfolio of pioneering glucose monitoring technologies by offering clinicians a device designed to meet the needs of a critical care patient.                  | 2008          |             | <a href="https://dexcom.gcs-web.com/static-files/b89639f0-c90a-4505-85ee-98122c5080db">https://dexcom.gcs-web.com/static-files/b89639f0-c90a-4505-85ee-98122c5080db</a> | 2020/8/15 |

| # | Company name   | #  | Partner company name  | Contract style    | Purpose of contract                                                                                                                                                                                                                                                 | Year of start | Year of end | Link of press release                                                                                                                                                                                                                                   | Accessed  |
|---|----------------|----|-----------------------|-------------------|---------------------------------------------------------------------------------------------------------------------------------------------------------------------------------------------------------------------------------------------------------------------|---------------|-------------|---------------------------------------------------------------------------------------------------------------------------------------------------------------------------------------------------------------------------------------------------------|-----------|
| 6 | Dexcom Inc.    | 18 | Livongo               | R&D Collaboration | To offer Livongo Members the ability to synch data from their Dexcom G6 Continuous Glucose Monitoring System with the Livongo platform, providing access to key insights and Health Nudges™ from Livongo's Applied Health Signals platform based on their CGM data. | 2020          |             | <a href="https://ir.livongo.com/news-releases/news-release-details/livongo-and-dexcom-partner-integrate-dexcoms-g6-continuous">https://ir.livongo.com/news-releases/news-release-details/livongo-and-dexcom-partner-integrate-dexcoms-g6-continuous</a> | 2020/8/15 |
| 6 | Dexcom Inc.    | 89 | TypeZero Technologies | M&A               | Combined with best-in-class CGM technology, we believe TypeZero's technology and strong team will accelerate our efforts to further differentiate Dexcom's portfolio.                                                                                               | 2018          |             | <a href="https://dexcom.gcs-web.com/news-releases/news-release-details/dexcom-acquires-typezero-technologies">https://dexcom.gcs-web.com/news-releases/news-release-details/dexcom-acquires-typezero-technologies</a>                                   | 2020/8/19 |
| 7 | SocialDiabetes | 93 | Axenia                | R&D Collaboration | To use of telemedicine and self-monitoring tools, as a way to safely treat and monitor patients and Social Diabetes is a world-class player, with European and FDA certification.                                                                                   | 2020          |             | <a href="https://blog.socialdiabetes.com/wp-content/uploads/2020/04/AXENYA-AND-SOCIAL-DIABETES-press-release.pdf">https://blog.socialdiabetes.com/wp-content/uploads/2020/04/AXENYA-AND-SOCIAL-DIABETES-press-release.pdf</a>                           | 2020/8/15 |

| # | Company name | #  | Partner company name | Contract style       | Purpose of contract                                                                                                                                                                                                          | Year of start | Year of end | Link of press release                                                                                                                                                                                                                                                                                 | Accessed  |
|---|--------------|----|----------------------|----------------------|------------------------------------------------------------------------------------------------------------------------------------------------------------------------------------------------------------------------------|---------------|-------------|-------------------------------------------------------------------------------------------------------------------------------------------------------------------------------------------------------------------------------------------------------------------------------------------------------|-----------|
| 8 | One Drop     | 94 | Sano                 | M&A                  | To leverage the acquired assets, including silicon-sensing production infrastructure, to design, produce, and commercialize a painless, silicon-based continuous health sensing platform for use across multiple conditions. | 2020          |             | <a href="https://onedrop.today/blogs/press-releases/one-drop-acquires-sano">https://onedrop.today/blogs/press-releases/one-drop-acquires-sano</a>                                                                                                                                                     | 2020/8/15 |
| 8 | One Drop     | 95 | Walmart              | Commercial agreement | Wireless glucose meter kit and supplies are now available at hundreds of Walmart stores in the United States.                                                                                                                | 2019          |             | <a href="https://onedrop.today/blogs/press-releases/one-drop-s-diabetes-management-platform-now-available-in-walmart-stores-across-the-united-states">https://onedrop.today/blogs/press-releases/one-drop-s-diabetes-management-platform-now-available-in-walmart-stores-across-the-united-states</a> | 2020/8/15 |
| 8 | One Drop     | 78 | Bayer                | Financial agreement  | \$40 million in Series B financing                                                                                                                                                                                           | 2019          |             | <a href="https://onedrop.today/blogs/press-releases/one-drop-bayer-partnership">https://onedrop.today/blogs/press-releases/one-drop-bayer-partnership</a>                                                                                                                                             | 2020/8/15 |
| 8 | One Drop     | 78 | Bayer                | Commercial agreement | To use One Drop' s platform in Bayer' s global bio-digital efforts in therapeutic areas such as oncology, cardiovascular disease, and women' s health.                                                                       | 2019          |             | <a href="https://onedrop.today/blogs/press-releases/one-drop-bayer-partnership">https://onedrop.today/blogs/press-releases/one-drop-bayer-partnership</a>                                                                                                                                             | 2020/8/15 |

| # | Company name | #   | Partner company name | Contract style       | Purpose of contract                                                                                                                                                                                         | Year of start | Year of end | Link of press release                                                                                                                                                                                                                                                                                                                               | Accessed  |
|---|--------------|-----|----------------------|----------------------|-------------------------------------------------------------------------------------------------------------------------------------------------------------------------------------------------------------|---------------|-------------|-----------------------------------------------------------------------------------------------------------------------------------------------------------------------------------------------------------------------------------------------------------------------------------------------------------------------------------------------------|-----------|
| 8 | One Drop     | 97  | Springbuk            | Expansion            | To enable employers to take control of their healthcare costs while at the same time empowering employees to make more informed decisions to live healthier lives.                                          | 2019          |             | <a href="https://onedrop.today/blogs/press-releases/springbuk-and-one-drop-partner-to-bring-data-driven-condition-management-to-employers-and-benefits-consultants">https://onedrop.today/blogs/press-releases/springbuk-and-one-drop-partner-to-bring-data-driven-condition-management-to-employers-and-benefits-consultants</a>                   | 2020/8/15 |
| 8 | One Drop     | 98  | OneDigital           | Expansion            | OneDigital will enhance its integrated approach to wellbeing by offering over 50,000 employer clients access to One Drop's digital self-care programs for people at-risk or living with chronic conditions. | 2019          |             | <a href="https://onedrop.today/blogs/press-releases/onedigital-one-drop-nationwide-partnership">https://onedrop.today/blogs/press-releases/onedigital-one-drop-nationwide-partnership</a>                                                                                                                                                           | 2020/8/15 |
| 8 | One Drop     | 99  | Amazon               | Commercial agreement | To bring affordable, accessible, and comprehensive digital health management services to Amazon's Choice customers living with diabetes and hypertension nationwide.                                        | 2019          |             | <a href="https://onedrop.today/blogs/press-releases/one-drop-partners-with-amazons-choice-to-expand-health-services-offering">https://onedrop.today/blogs/press-releases/one-drop-partners-with-amazons-choice-to-expand-health-services-offering</a>                                                                                               | 2020/8/15 |
| 8 | One Drop     | 100 | John Hancock         | Commercial agreement | To combat myths around people with diabetes not qualifying for life insurance and offer an innovative solution that combines life insurance with a technology-enabled wellness program.                     | 2018          |             | <a href="https://onedrop.today/blogs/press-releases/john-hancock-and-one-drop-partner-to-empower-people-living-with-diabetes-to-improve-their-health-and-financial-wellness">https://onedrop.today/blogs/press-releases/john-hancock-and-one-drop-partner-to-empower-people-living-with-diabetes-to-improve-their-health-and-financial-wellness</a> | 2020/8/15 |

| # | Company name | #   | Partner company name | Contract style    | Purpose of contract                                                                                                                                                                                | Year of start | Year of end | Link of press release                                                                                                                                                                                                                                                                                     | Accessed  |
|---|--------------|-----|----------------------|-------------------|----------------------------------------------------------------------------------------------------------------------------------------------------------------------------------------------------|---------------|-------------|-----------------------------------------------------------------------------------------------------------------------------------------------------------------------------------------------------------------------------------------------------------------------------------------------------------|-----------|
| 8 | One Drop     | 101 | Companion Medical    | R&D Collaboration | To integrate their platforms so that data from both devices are available real-time in both apps, allowing users to view a more complete and useful set of data in their app of choice.            | 2018          |             | <a href="https://onedrop.today/blogs/press-releases/smart-insulin-delivery-one-drop-diabetes-companion-medical-partnership">https://onedrop.today/blogs/press-releases/smart-insulin-delivery-one-drop-diabetes-companion-medical-partnership</a>                                                         | 2020/8/15 |
| 8 | One Drop     | 23  | fitbit               | R&D Collaboration | To use the power of Fitbit wearable data to bring enhanced data-driven care management tools to the diabetes community.                                                                            | 2017          |             | <a href="https://onedrop.today/blogs/press-releases/one-drop-partners-fitbit-bring-diabetes-management-data-insights-users-worldwide">https://onedrop.today/blogs/press-releases/one-drop-partners-fitbit-bring-diabetes-management-data-insights-users-worldwide</a>                                     | 2020/8/15 |
| 8 | One Drop     | 102 | MannKind             | R&D Collaboration | To identify ways of simplifying the complexity of starting and staying on mealtime insulin along with Customized Coaching to help people achieve their A1C goals.                                  | 2017          |             | <a href="https://onedrop.today/blogs/press-releases/mannkind-one-drop-partner-launch-one-clinical-trial">https://onedrop.today/blogs/press-releases/mannkind-one-drop-partner-launch-one-clinical-trial</a>                                                                                               | 2020/8/15 |
| 8 | One Drop     | 102 | MannKind             | R&D Collaboration | To empower everyone with diabetes to achieve better health outcomes through the use of modern delivery methods that reduce the burden of diabetes management and increase engagement in self-care. | 2017          |             | <a href="https://onedrop.today/blogs/press-releases/mannkind-and-one-drop-to-collaborate-on-delivering-better-health-outcomes-for-people-with-diabetes">https://onedrop.today/blogs/press-releases/mannkind-and-one-drop-to-collaborate-on-delivering-better-health-outcomes-for-people-with-diabetes</a> | 2020/8/15 |

| # | Company name | #   | Partner company name                                   | Contract style       | Purpose of contract                                                                                                                                                                           | Year of start | Year of end | Link of press release                                                                                                                                                                                                                                                             | Accessed  |
|---|--------------|-----|--------------------------------------------------------|----------------------|-----------------------------------------------------------------------------------------------------------------------------------------------------------------------------------------------|---------------|-------------|-----------------------------------------------------------------------------------------------------------------------------------------------------------------------------------------------------------------------------------------------------------------------------------|-----------|
| 9 | Health2Sync  | 103 | CTBC Bank                                              | R&D<br>Collaboration | To establish the world's first diabetes data trust; an extremely secure, yet transparent ecosystem which streamlines diabetes research projects while ensuring the privacy of patients' data. | 2019          |             | <a href="https://www.prnewswire.com/news-releases/health2sync-ctbc-bank-and-bitmark-launch-worlds-first-diabetes-data-trust-300817554.html">https://www.prnewswire.com/news-releases/health2sync-ctbc-bank-and-bitmark-launch-worlds-first-diabetes-data-trust-300817554.html</a> | 2020/8/15 |
| 9 | Health2Sync  | 104 | Bitmark                                                | R&D<br>Collaboration | To establish the world's first diabetes data trust; an extremely secure, yet transparent ecosystem which streamlines diabetes research projects while ensuring the privacy of patients' data. | 2019          |             | <a href="https://www.prnewswire.com/news-releases/health2sync-ctbc-bank-and-bitmark-launch-worlds-first-diabetes-data-trust-300817554.html">https://www.prnewswire.com/news-releases/health2sync-ctbc-bank-and-bitmark-launch-worlds-first-diabetes-data-trust-300817554.html</a> | 2020/8/15 |
| 9 | Health2Sync  | 105 | Sompo Japan<br>Nipponkoa<br>Himawari Life<br>Insurance | R&D<br>Collaboration | To build a framework to provide services supporting health maintenance and improvement, including for diabetes patients, to contribute in realizing a healthier society.                      | 2019          |             | <a href="https://www.sompo-hd.com/~media/hd/en/files/news/2019/e_20190320_h1.pdf">https://www.sompo-hd.com/~media/hd/en/files/news/2019/e_20190320_h1.pdf</a>                                                                                                                     | 2020/8/15 |

| # | Company name | #   | Partner company name      | Contract style    | Purpose of contract                                                                                                                                                                                          | Year of start | Year of end | Link of press release                                                                                                                                                                                                                                                                                                                                                                                   | Accessed  |
|---|--------------|-----|---------------------------|-------------------|--------------------------------------------------------------------------------------------------------------------------------------------------------------------------------------------------------------|---------------|-------------|---------------------------------------------------------------------------------------------------------------------------------------------------------------------------------------------------------------------------------------------------------------------------------------------------------------------------------------------------------------------------------------------------------|-----------|
| 9 | Health2Sync  | 12  | Novo Nordisk              | Expansion         | To support the localization and promotion of the "SyncHealth" App (known as Health2Sync outside of Japan) and web platform for patient management.                                                           | 2018          |             | <a href="https://www.prnewswire.com/news-releases/novo-nordisk-pharma-ltd-partners-with-health2sync-in-japan-bringing-digital-diabetes-management-to-healthcare-providers-and-patients-300806311.html">https://www.prnewswire.com/news-releases/novo-nordisk-pharma-ltd-partners-with-health2sync-in-japan-bringing-digital-diabetes-management-to-healthcare-providers-and-patients-300806311.html</a> | 2020/8/15 |
| 9 | Health2Sync  | 23  | fitbit                    | R&D Collaboration | Integrating Fitbit into the platform provides Health2Sync users with a more holistic view of their health, which can support them in making healthy lifestyle choices to better manage their condition.      | 2019          |             | <a href="https://www.mobihealthnews.com/news/asia-pacific/fitbit-and-health2sync-collaborate-support-diabetes-management-taiwan-and-japan">https://www.mobihealthnews.com/news/asia-pacific/fitbit-and-health2sync-collaborate-support-diabetes-management-taiwan-and-japan</a>                                                                                                                         | 2020/8/15 |
| 9 | Health2Sync  | 106 | Taiwan Ministry of Health | Expansion         | To reduce the time and expense of administering remote diabetes care, and it has been used by more than 30 hospitals and clinics in Taiwan to provide real-time tracking and immediate feedback to patients. | 2016          |             | <a href="https://www.mobihealthnews.com/content/health2sync-partners-taiwan-ministry-health-offer-diabetes-management-platform-nationwide">https://www.mobihealthnews.com/content/health2sync-partners-taiwan-ministry-health-offer-diabetes-management-platform-nationwide</a>                                                                                                                         | 2020/8/15 |

| #  | Company name | #  | Partner company name | Contract style    | Purpose of contract                                                                                                                                                                                                                                                                              | Year of start | Year of end | Link of press release                                                                                                                                                                                                                                                                                                                                                                       | Accessed  |
|----|--------------|----|----------------------|-------------------|--------------------------------------------------------------------------------------------------------------------------------------------------------------------------------------------------------------------------------------------------------------------------------------------------|---------------|-------------|---------------------------------------------------------------------------------------------------------------------------------------------------------------------------------------------------------------------------------------------------------------------------------------------------------------------------------------------------------------------------------------------|-----------|
| 11 | Abbott       | 43 | Omada Health         | R&D Collaboration | To integrate Abbott's revolutionary FreeStyle Libre system, a continuous glucose monitoring (CGM) technology, with Omada Health's pioneering digital care program, aiming to create a new paradigm for people with Type 2 diabetes.                                                              | 2019          |             | <a href="https://abbott.mediaroom.com/2019-10-14-Abbott-and-Omada-Health-Partner-to-Offer-Integrated-Digital-Health-and-Coaching-Experience-for-People-with-Type-2-Diabetes">https://abbott.mediaroom.com/2019-10-14-Abbott-and-Omada-Health-Partner-to-Offer-Integrated-Digital-Health-and-Coaching-Experience-for-People-with-Type-2-Diabetes</a>                                         | 2020/8/15 |
| 11 | Abbott       | 13 | Insulet              | R&D Collaboration | To integrate Abbott's world-leading glucose sensing technology with Insulet's next-generation tubeless system, the Omnipod Horizon™ Automated Insulin Delivery (AID) System (Omnipod Horizon System), to offer personalized automated insulin delivery and care for people living with diabetes. | 2020          |             | <a href="https://abbott.mediaroom.com/2020-02-19-Abbott-and-Insulet-Partner-to-Integrate-Next-Generation-Glucose-Sensing-and-Automated-Insulin-Delivery-Technologies-for-Seamless-Diabetes-Care">https://abbott.mediaroom.com/2020-02-19-Abbott-and-Insulet-Partner-to-Integrate-Next-Generation-Glucose-Sensing-and-Automated-Insulin-Delivery-Technologies-for-Seamless-Diabetes-Care</a> | 2020/8/15 |

| #  | Company name | #   | Partner company name | Contract style      | Purpose of contract                                                                                                                                                                                                                        | Year of start | Year of end | Link of press release                                                                                                                                                                                                                                                                                                                                                 | Accessed  |
|----|--------------|-----|----------------------|---------------------|--------------------------------------------------------------------------------------------------------------------------------------------------------------------------------------------------------------------------------------------|---------------|-------------|-----------------------------------------------------------------------------------------------------------------------------------------------------------------------------------------------------------------------------------------------------------------------------------------------------------------------------------------------------------------------|-----------|
| 11 | Abbott       | 76  | Sanofi               | R&D Collaboration   | To take an innovative approach to connected care by developing tools that combine the revolutionary FreeStyle Libre technology with Sanofi' s insulin dosing information for future smart pens, insulin titration apps and cloud software. | 2019          |             | <a href="https://abbott.mediaroom.com/2019-09-16-Abbott-and-Sanofi-Partner-to-Integrate-Glucose-Sensing-and-Insulin-Delivery-Technologies-to-Help-Change-the-Way-Diabetes-is-Managed">https://abbott.mediaroom.com/2019-09-16-Abbott-and-Sanofi-Partner-to-Integrate-Glucose-Sensing-and-Insulin-Delivery-Technologies-to-Help-Change-the-Way-Diabetes-is-Managed</a> | 2020/8/15 |
| 11 | Abbott       | 12  | Novo Nordisk         | R&D Collaboration   | To make diabetes management easier by connecting key technologies such as continuous glucose monitoring (CGM) and connected insulin pens.                                                                                                  | 2019          |             | <a href="https://abbott.mediaroom.com/2019-02-20-Abbott-and-Novo-Nordisk-Enter-Partnership-to-Provide-Integrated-Digital-Solution-to-People-with-Diabetes-Using-Insulin">https://abbott.mediaroom.com/2019-02-20-Abbott-and-Novo-Nordisk-Enter-Partnership-to-Provide-Integrated-Digital-Solution-to-People-with-Diabetes-Using-Insulin</a>                           | 2020/8/15 |
| 11 | Abbott       | 112 | CARE                 | Financial agreement | A three-year, \$1 million program to screen, diagnose, prevent and manage noncommunicable diseases (NCDs) for people who remain displaced two years after armed conflict in Marawi City, Philippines.                                      | 2019          |             | <a href="https://abbott.mediaroom.com/2019-06-17-CARE-Abbott-and-the-Abbott-Fund-Launch-Partnership-to-Address-Noncommunicable-Diseases-NCDs-in-Humanitarian-Settings">https://abbott.mediaroom.com/2019-06-17-CARE-Abbott-and-the-Abbott-Fund-Launch-Partnership-to-Address-Noncommunicable-Diseases-NCDs-in-Humanitarian-Settings</a>                               | 2020/8/15 |

| #  | Company name | #  | Partner company name | Contract style    | Purpose of contract                                                                                                                                                                                                             | Year of start | Year of end | Link of press release                                                                                                                                                                                                                                                                                                                                 | Accessed  |
|----|--------------|----|----------------------|-------------------|---------------------------------------------------------------------------------------------------------------------------------------------------------------------------------------------------------------------------------|---------------|-------------|-------------------------------------------------------------------------------------------------------------------------------------------------------------------------------------------------------------------------------------------------------------------------------------------------------------------------------------------------------|-----------|
| 11 | Abbott       | 22 | Bigfoot Biomedical   | R&D Collaboration | To develop and commercialize diabetes management systems, integrating Abbott's FreeStyle® Libre glucose sensing technology with Bigfoot's insulin delivery solutions in the United States.                                      | 2017          |             | <a href="https://www.bigfootbiomedical.com/abbott-bigfoot-collaboration">https://www.bigfootbiomedical.com/abbott-bigfoot-collaboration</a>                                                                                                                                                                                                           | 2020/8/15 |
| 11 | Abbott       | 18 | Livongo              | R&D Collaboration | To be the first comprehensive offering for people with diabetes to integrate continuous glucose data from Abbott's FreeStyle® Libre Pro System, a revolutionary CGM system for healthcare professionals.                        | 2018          |             | <a href="https://www.prnewswire.com/news-releases/livongo-becomes-first-comprehensive-diabetes-offering-to-add-abbotts-freestyle-libre-pro-system-to-platform-300706912.html">https://www.prnewswire.com/news-releases/livongo-becomes-first-comprehensive-diabetes-offering-to-add-abbotts-freestyle-libre-pro-system-to-platform-300706912.html</a> | 2020/8/15 |
| 11 | Abbott       | 17 | mySugr               | R&D Collaboration | To allow users with compatible Android smartphones using the LibreLink1 app to see glucose levels in mySugr alongside the rest of their data, providing additional context and immediate value when making treatment decisions. | 2016          |             | <a href="https://www.mysugr.com/static/assets/downloads/press_releases/EASD-mySugr-and-Abbott-Freestyle-Libre-Press-Release.pdf">https://www.mysugr.com/static/assets/downloads/press_releases/EASD-mySugr-and-Abbott-Freestyle-Libre-Press-Release.pdf</a>                                                                                           | 2020/8/15 |

| #  | Company name | #   | Partner company name          | Contract style    | Purpose of contract                                                                                                                                                                            | Year of start | Year of end | Link of press release                                                                                                                                                                                                                     | Accessed  |
|----|--------------|-----|-------------------------------|-------------------|------------------------------------------------------------------------------------------------------------------------------------------------------------------------------------------------|---------------|-------------|-------------------------------------------------------------------------------------------------------------------------------------------------------------------------------------------------------------------------------------------|-----------|
| 12 | Novo Nordisk | 113 | University of Virginia Center | R&D Collaboration | To enable simulation of the human metabolic system of different types of individual people with type 2 diabetes and simulating virtual patient populations.                                    | 2019          |             | <a href="https://www.novonordisk.com/content/Denmark/HQ/www-novonordisk-com/en_gb/home/media/news-details.2222090.html">https://www.novonordisk.com/content/Denmark/HQ/www-novonordisk-com/en_gb/home/media/news-details.2222090.html</a> | 2020/8/16 |
| 12 | Novo Nordisk | 42  | Noom                          | R&D Collaboration | To improve care, will initially make solutions for behaviour change and education available to people with obesity in the US.                                                                  | 2019          |             | <a href="https://www.novonordisk.com/content/Denmark/HQ/www-novonordisk-com/en_gb/home/media/news-details.2177759.html">https://www.novonordisk.com/content/Denmark/HQ/www-novonordisk-com/en_gb/home/media/news-details.2177759.html</a> | 2020/8/16 |
| 12 | Novo Nordisk | 114 | UNICEF                        | Expansion         | To enhance knowledge among decision-makers on successful policies to prevent childhood overweight and obesity in middle-income countries                                                       | 2019          |             | <a href="https://www.novonordisk.com/content/Denmark/HQ/www-novonordisk-com/en_gb/home/media/news-details.2207389.html">https://www.novonordisk.com/content/Denmark/HQ/www-novonordisk-com/en_gb/home/media/news-details.2207389.html</a> | 2020/8/16 |
| 12 | Novo Nordisk | 115 | Embark                        | R&D Collaboration | To enter into a research collaboration focusing on the discovery of novel treatments for obesity and its associated metabolic pathologies through mechanisms that increase energy expenditure. | 2018          |             | <a href="https://www.novonordisk.com/content/Denmark/HQ/www-novonordisk-com/en_gb/home/media/news-details.1862314.html">https://www.novonordisk.com/content/Denmark/HQ/www-novonordisk-com/en_gb/home/media/news-details.1862314.html</a> | 2020/8/16 |

| #  | Company name | #   | Partner company name | Contract style      | Purpose of contract                                                                                                                                                                 | Year of start | Year of end | Link of press release                                                                                                                                                                                                                     | Accessed  |
|----|--------------|-----|----------------------|---------------------|-------------------------------------------------------------------------------------------------------------------------------------------------------------------------------------|---------------|-------------|-------------------------------------------------------------------------------------------------------------------------------------------------------------------------------------------------------------------------------------------|-----------|
| 12 | Novo Nordisk | 6   | Dexcom Inc.          | R&D Collaboration   | To seamlessly integrate insulin dosing data from connected pen devices with its partners' open ecosystems and diabetes management solutions, such as data from CGM systems and BGM. | 2018          |             | <a href="https://www.novonordisk.com/content/Denmark/HQ/www-novonordisk-com/en_gb/home/media/news-details.1792208.html">https://www.novonordisk.com/content/Denmark/HQ/www-novonordisk-com/en_gb/home/media/news-details.1792208.html</a> | 2020/8/16 |
| 12 | Novo Nordisk | 37  | Glooko               | R&D Collaboration   | To seamlessly integrate insulin dosing data from connected pen devices with its partners' open ecosystems and diabetes management solutions, such as data from CGM systems and BGM. | 2018          |             | <a href="https://www.novonordisk.com/content/Denmark/HQ/www-novonordisk-com/en_gb/home/media/news-details.1792208.html">https://www.novonordisk.com/content/Denmark/HQ/www-novonordisk-com/en_gb/home/media/news-details.1792208.html</a> | 2020/8/16 |
| 12 | Novo Nordisk | 2   | Hoffmann-La Roche    | R&D Collaboration   | To seamlessly integrate insulin dosing data from connected pen devices with its partners' open ecosystems and diabetes management solutions, such as data from CGM systems and BGM. | 2018          |             | <a href="https://www.novonordisk.com/content/Denmark/HQ/www-novonordisk-com/en_gb/home/media/news-details.1792208.html">https://www.novonordisk.com/content/Denmark/HQ/www-novonordisk-com/en_gb/home/media/news-details.1792208.html</a> | 2020/8/16 |
| 12 | Novo Nordisk | 116 | Danish Government    | Financial agreement | Grants of 3 and 5 million US dollars respectively to the newly established Defeat-NCD Partnership during a launch event at the UN General Assembly.                                 | 2018          |             | <a href="https://www.novonordisk.com/content/Denmark/HQ/www-novonordisk-com/en_gb/home/media/news-details.1792204.html">https://www.novonordisk.com/content/Denmark/HQ/www-novonordisk-com/en_gb/home/media/news-details.1792204.html</a> | 2020/8/16 |

| #  | Company name | #   | Partner company name | Contract style    | Purpose of contract                                                                                                                                   | Year of start | Year of end | Link of press release                                                                                                                                                                                                                     | Accessed  |
|----|--------------|-----|----------------------|-------------------|-------------------------------------------------------------------------------------------------------------------------------------------------------|---------------|-------------|-------------------------------------------------------------------------------------------------------------------------------------------------------------------------------------------------------------------------------------------|-----------|
| 12 | Novo Nordisk | 117 | Ziylo                | M&A               | To accelerate its development of glucose responsive insulins                                                                                          | 2018          |             | <a href="https://www.novonordisk.com/content/Denmark/HQ/www-novonordisk-com/en_gb/home/media/news-details.1792200.html">https://www.novonordisk.com/content/Denmark/HQ/www-novonordisk-com/en_gb/home/media/news-details.1792200.html</a> | 2020/8/16 |
| 12 | Novo Nordisk | 118 | Kallyope             | R&D Collaboration | To discover novel therapeutics for obesity and diabetes                                                                                               | 2018          |             | <a href="https://www.novonordisk.com/content/Denmark/HQ/www-novonordisk-com/en_gb/home/media/news-details.1792197.html">https://www.novonordisk.com/content/Denmark/HQ/www-novonordisk-com/en_gb/home/media/news-details.1792197.html</a> | 2020/8/16 |
| 12 | Novo Nordisk | 119 | University of Oxford | R&D Collaboration | To enable scientists from Novo Nordisk and University of Oxford to collaborate to discover innovative approaches for treating type 2 diabetes.        | 2017          |             | <a href="https://www.novonordisk.com/content/Denmark/HQ/www-novonordisk-com/en_gb/home/media/news-details.1792138.html">https://www.novonordisk.com/content/Denmark/HQ/www-novonordisk-com/en_gb/home/media/news-details.1792138.html</a> | 2020/8/16 |
| 12 | Novo Nordisk | 37  | Glooko               | R&D Collaboration | To deliver jointly-developed and branded digital health solutions for people with diabetes.                                                           | 2017          |             | <a href="https://www.novonordisk.com/content/Denmark/HQ/www-novonordisk-com/en_gb/home/media/news-details.1792136.html">https://www.novonordisk.com/content/Denmark/HQ/www-novonordisk-com/en_gb/home/media/news-details.1792136.html</a> | 2020/8/16 |
| 12 | Novo Nordisk | 26  | IBM Watson Health    | R&D Collaboration | To explore possibilities for improved diabetes care via insights from real-time, real-world evidence of Novo Nordisk diabetes treatments and devices. | 2015          |             | <a href="https://www.novonordisk.com/content/Denmark/HQ/www-novonordisk-com/en_gb/home/media/news-details.1791916.html">https://www.novonordisk.com/content/Denmark/HQ/www-novonordisk-com/en_gb/home/media/news-details.1791916.html</a> | 2020/8/16 |

| #  | Company name | #   | Partner company name     | Contract style    | Purpose of contract                                                                                                                                                                       | Year of start | Year of end | Link of press release                                                                                                                                                                                                                     | Accessed  |
|----|--------------|-----|--------------------------|-------------------|-------------------------------------------------------------------------------------------------------------------------------------------------------------------------------------------|---------------|-------------|-------------------------------------------------------------------------------------------------------------------------------------------------------------------------------------------------------------------------------------------|-----------|
| 12 | Novo Nordisk | 120 | University of Washington | R&D Collaboration | To understand factors mediating brain control of blood glucose and appetite with the ultimate goal of developing new therapeutic agents for the treatment of diabetes and obesity.        | 2015          | 2018        | <a href="https://www.novonordisk.com/content/Denmark/HQ/www-novonordisk-com/en_gb/home/media/news-details.1791878.html">https://www.novonordisk.com/content/Denmark/HQ/www-novonordisk-com/en_gb/home/media/news-details.1791878.html</a> | 2020/8/16 |
| 12 | Novo Nordisk | 121 | Calibrium                | M&A               | To expand Novo Nordisk's portfolio of projects and intellectual property rights within diabetes and obesity and provide a basis for expanding Novo Nordisk's research presence in the US. | 2015          |             | <a href="https://www.novonordisk.com/content/Denmark/HQ/www-novonordisk-com/en_gb/home/media/news-details.1791830.html">https://www.novonordisk.com/content/Denmark/HQ/www-novonordisk-com/en_gb/home/media/news-details.1791830.html</a> | 2020/8/16 |
| 12 | Novo Nordisk | 122 | MB2                      | M&A               | To expand Novo Nordisk's portfolio of projects and intellectual property rights within diabetes and obesity and provide a basis for expanding Novo Nordisk's research presence in the US. | 2015          |             | <a href="https://www.novonordisk.com/content/Denmark/HQ/www-novonordisk-com/en_gb/home/media/news-details.1791830.html">https://www.novonordisk.com/content/Denmark/HQ/www-novonordisk-com/en_gb/home/media/news-details.1791830.html</a> | 2020/8/16 |
| 12 | Novo Nordisk | 123 | Karolinska Institutet    | R&D Collaboration | Collaboration agreement in the field of diabetes. The programme will be fully funded by Novo Nordisk.                                                                                     | 2015          | 2018        | <a href="https://www.novonordisk.com/content/Denmark/HQ/www-novonordisk-com/en_gb/home/media/news-details.1791712.html">https://www.novonordisk.com/content/Denmark/HQ/www-novonordisk-com/en_gb/home/media/news-details.1791712.html</a> | 2020/8/16 |

| #  | Company name | #   | Partner company name | Contract style       | Purpose of contract                                                                                                                                                                                                                                                                | Year of start | Year of end | Link of press release                                                                                                                                                                                                                                                           | Accessed  |
|----|--------------|-----|----------------------|----------------------|------------------------------------------------------------------------------------------------------------------------------------------------------------------------------------------------------------------------------------------------------------------------------------|---------------|-------------|---------------------------------------------------------------------------------------------------------------------------------------------------------------------------------------------------------------------------------------------------------------------------------|-----------|
| 13 | Insulet      | 25  | Samsung              | R&D Collaboration    | To Deliver Galaxy Smartphone-Controlled Insulin Pump Delivery System                                                                                                                                                                                                               | 2018          |             | <a href="https://investor.insulet.com/news-releases/news-release-details/insulet-collaborates-samsung-deliver-galaxy-smartphone">https://investor.insulet.com/news-releases/news-release-details/insulet-collaborates-samsung-deliver-galaxy-smartphone</a>                     | 2020/8/16 |
| 13 | Insulet      | 37  | Glooko               | R&D Collaboration    | To connect Insulet's Omnipod System user data with Glooko+diasend®, the most comprehensive diabetes data management system available, across Europe.                                                                                                                               | 2018          |             | <a href="https://investor.insulet.com/news-releases/news-release-details/insulet-extends-partnership-glooko-europe-optimize-diabetes-data">https://investor.insulet.com/news-releases/news-release-details/insulet-extends-partnership-glooko-europe-optimize-diabetes-data</a> | 2020/8/16 |
| 13 | Insulet      | 124 | Mode AGC             | R&D Collaboration    | To improve the quality of life for individuals with insulin-dependent diabetes.                                                                                                                                                                                                    | 2016          |             | <a href="https://investor.insulet.com/news-releases/news-release-details/insulet-announces-development-partner-omnipod-artificial">https://investor.insulet.com/news-releases/news-release-details/insulet-announces-development-partner-omnipod-artificial</a>                 | 2020/8/16 |
| 13 | Insulet      | 3   | Medtronic            | Patent cross-license | To provide for a cross-license of certain patent claims, as well as an agreement between the companies not to sue the other for patent infringement based on any existing product, or any feature, element or component in any currently existing commercially available products. | 2013          |             | <a href="https://investor.insulet.com/news-releases/news-release-details/insulet-reaches-settlement-and-cross-license-agreement-medtronic">https://investor.insulet.com/news-releases/news-release-details/insulet-reaches-settlement-and-cross-license-agreement-medtronic</a> | 2020/8/16 |

| #  | Company name | #   | Partner company name | Contract style       | Purpose of contract                                                                                                                                            | Year of start | Year of end | Link of press release                                                                                                                                                                                                                                                         | Accessed  |
|----|--------------|-----|----------------------|----------------------|----------------------------------------------------------------------------------------------------------------------------------------------------------------|---------------|-------------|-------------------------------------------------------------------------------------------------------------------------------------------------------------------------------------------------------------------------------------------------------------------------------|-----------|
| 13 | Insulet      | 125 | Ypsomed              | Commercial agreement | The exclusive distributor of the OmniPod insulin pump in a total of 22 countries, including several additional countries in Europe, the Middle East, and Asia. | 2012          |             | <a href="https://investor.insulet.com/news-releases/news-release-details/insulet-expands-international-distribution-partnership-ypsomed">https://investor.insulet.com/news-releases/news-release-details/insulet-expands-international-distribution-partnership-ypsomed</a>   | 2020/8/16 |
| 13 | Insulet      | 1   | LifeScan             | R&D Collaboration    | To provide its glucose monitoring technology to Insulet who will be responsible for the development, design and approval of the integrated device.             | 2012          |             | <a href="https://investor.insulet.com/news-releases/news-release-details/insulet-announces-global-agreement-lifescan-inc-integrate-their">https://investor.insulet.com/news-releases/news-release-details/insulet-announces-global-agreement-lifescan-inc-integrate-their</a> | 2020/8/16 |
| 13 | Insulet      | 126 | GlaxoSmithKline      | Commercial agreement | An exclusive distribution agreement for the OmniPod Insulin Management System in Canada.                                                                       | 2011          |             | <a href="https://investor.insulet.com/news-releases/news-release-details/insulet-corporation-and-glaxosmithkline-inc-sign-distribution">https://investor.insulet.com/news-releases/news-release-details/insulet-corporation-and-glaxosmithkline-inc-sign-distribution</a>     | 2020/8/16 |
| 13 | Insulet      | 125 | Ypsomed              | Commercial agreement | An exclusive agreement for the distribution of the OmniPod Insulin Management System in nine countries across Europe, as well as China and Australia.          | 2010          |             | <a href="https://investor.insulet.com/news-releases/news-release-details/insulet-and-ypsomed-sign-international-distribution-agreement">https://investor.insulet.com/news-releases/news-release-details/insulet-and-ypsomed-sign-international-distribution-agreement</a>     | 2020/8/16 |
| 14 | Diabeloop    | 127 | ViCentra             | Commercial agreement | Mutual distribution agreement for selected European countries.                                                                                                 | 2019          |             | <a href="https://www.diabeloop.com/media-press/press-releases/diabeloop-vicentra-distribution-partnership">https://www.diabeloop.com/media-press/press-releases/diabeloop-vicentra-distribution-partnership</a>                                                               | 2020/8/16 |

| #  | Company name | #   | Partner company name | Contract style    | Purpose of contract                                                                                                                                                                                                                                                                                                                                                                                         | Year of start | Year of end | Link of press release                                                                                                                                                                                                                                                                                   | Accessed  |
|----|--------------|-----|----------------------|-------------------|-------------------------------------------------------------------------------------------------------------------------------------------------------------------------------------------------------------------------------------------------------------------------------------------------------------------------------------------------------------------------------------------------------------|---------------|-------------|---------------------------------------------------------------------------------------------------------------------------------------------------------------------------------------------------------------------------------------------------------------------------------------------------------|-----------|
| 15 | Virta Health | 128 | Accolade             | R&D Collaboration | For employees at our shared customers, access to the Virta Treatment will be that much easier.                                                                                                                                                                                                                                                                                                              | 2019          |             | <a href="https://www.virtahealth.com/blog/virta-accolade-partnership-diabetes-reversal">https://www.virtahealth.com/blog/virta-accolade-partnership-diabetes-reversal</a>                                                                                                                               | 2020/8/16 |
| 15 | Virta Health | 58  | Willis Towers Watson | Expansion         | To accelerate adoption of the Virta Treatment among self-insured employers while addressing a critical employer need.                                                                                                                                                                                                                                                                                       | 2019          |             | <a href="https://www.virtahealth.com/blog/virta-health-engages-with-willis-towers-watson-to-accelerate-adoption-of-type-2-diabetes-reversal-treatment">https://www.virtahealth.com/blog/virta-health-engages-with-willis-towers-watson-to-accelerate-adoption-of-type-2-diabetes-reversal-treatment</a> | 2020/8/16 |
| 16 | Nemauro      | 129 | Healthimation        | M&A               | The program is delivered using Hollywood level animation deploying creative user engagement strategies, with a unique program structure aimed at maintaining muscle mass and enhancing metabolism to improve overall health and prevent the regaining of weight. The Company believes these features could form a strong complement to the proBEAT™ subscription service Nemauro plans to offer in the U.S. | 2020          |             | <a href="https://nemauromedical.com/nemauro-a-enters-into-letter-of-intent-to-acquire-healthimation-llc-to-augment-probeat-launch-in-the-us/">https://nemauromedical.com/nemauro-a-enters-into-letter-of-intent-to-acquire-healthimation-llc-to-augment-probeat-launch-in-the-us/</a>                   | 2020/8/16 |

| #  | Company name | #   | Partner company name      | Contract style       | Purpose of contract                                                                                                                                                                             | Year of start | Year of end | Link of press release                                                                                                                                                                                                                                                       | Accessed  |
|----|--------------|-----|---------------------------|----------------------|-------------------------------------------------------------------------------------------------------------------------------------------------------------------------------------------------|---------------|-------------|-----------------------------------------------------------------------------------------------------------------------------------------------------------------------------------------------------------------------------------------------------------------------------|-----------|
| 16 | Nemauro      | 130 | TPMENA                    | Commercial agreement | An exclusive license and supply agreement for SugarBEAT® with TPMENA in the Gulf Cooperation Council (GCC) Region, which includes Bahrain, Kuwait, Saudi Arabia, Oman and United Arab Emirates. | 2019          |             | <a href="https://nemauromedical.com/nemauro-a-medical-announces-exclusive-license-and-supply-agreement-for-sugarbeat-in-the-gcc-region/">https://nemauromedical.com/nemauro-a-medical-announces-exclusive-license-and-supply-agreement-for-sugarbeat-in-the-gcc-region/</a> | 2020/8/16 |
| 16 | Nemauro      | 131 | Al-Danah                  | Commercial agreement | An exclusive licensing agreement with Al-Danah Medical Co for the commercial launch of sugarBEAT® in Qatar.                                                                                     | 2018          |             | <a href="https://nemauromedical.com/nemauro-a-signs-letter-of-intent-for-sugarbeat-commercial-launch-in-qatar/">https://nemauromedical.com/nemauro-a-signs-letter-of-intent-for-sugarbeat-commercial-launch-in-qatar/</a>                                                   | 2020/8/16 |
| 16 | Nemauro      | 132 | Dallas Burston Ethitronix | R&D Collaboration    | Joint Collaboration Agreement for European Commercialization                                                                                                                                    | 2018          |             | <a href="https://nemauromedical.com/nemauro-a-medical-signs-joint-collaboration-agreement-european-commercialization/">https://nemauromedical.com/nemauro-a-medical-signs-joint-collaboration-agreement-european-commercialization/</a>                                     | 2020/8/16 |
| 16 | Nemauro      | 133 | Device Technologies       | Commercial agreement | Non-binding term sheet with Device Technologies for exclusive rights to market and sell sugarBEAT® in Australia and New Zealand.                                                                | 2017          |             | <a href="https://nemauromedical.com/nemauro-a-signs-heads-terms-sugarbeat-device-technologies-australia-new-zealand/">https://nemauromedical.com/nemauro-a-signs-heads-terms-sugarbeat-device-technologies-australia-new-zealand/</a>                                       | 2020/8/16 |

| #  | Company name | #   | Partner company name | Contract style       | Purpose of contract                                                                                                                                                                                                        | Year of start | Year of end | Link of press release                                                                                                                                                                                                                                                                                   | Accessed  |
|----|--------------|-----|----------------------|----------------------|----------------------------------------------------------------------------------------------------------------------------------------------------------------------------------------------------------------------------|---------------|-------------|---------------------------------------------------------------------------------------------------------------------------------------------------------------------------------------------------------------------------------------------------------------------------------------------------------|-----------|
| 16 | Nemauro      | 130 | TPMENA               | Patent cross-license | The licensing agreement with TPM, who are a well-established market leader with the requisite market knowledge and client base to successfully commercialise sugarBEAT®.                                                   | 2017          |             | <a href="https://nemauromedical.com/nemauro-a-signs-letter-intent-licensing-agreement-tpm-gcc-region/">https://nemauromedical.com/nemauro-a-signs-letter-intent-licensing-agreement-tpm-gcc-region/</a>                                                                                                 | 2020/8/16 |
| 16 | Nemauro      | 134 | Shenzen CAS Health   | M&A                  | (a) setting up a joint venture company to distribute in China, (b) setting up a manufacturing facility in China and (c) obtaining CFDA approval. Nemauro Medical recognises the size and importance of the Chinese market. | 2016          |             | <a href="https://nemauromedical.com/nemauro-a-medical-inc-sign-letter-intent-shenzen-cas-health-corp-potential-jv-manufacture-sugarbeat%E8%92-system/">https://nemauromedical.com/nemauro-a-medical-inc-sign-letter-intent-shenzen-cas-health-corp-potential-jv-manufacture-sugarbeat%E8%92-system/</a> | 2020/8/16 |
| 16 | Nemauro      | 135 | DBJ Jersey           | M&A                  | Equal Joint Venture agreement with DBJ Jersey to market the sugarBEAT® system in Europe.                                                                                                                                   | 2015          |             | <a href="https://nemauromedical.com/nemauro-a-medical-announces-joint-venture-for-european-launch-of-sugarbeat-system/">https://nemauromedical.com/nemauro-a-medical-announces-joint-venture-for-european-launch-of-sugarbeat-system/</a>                                                               | 2020/8/16 |
| 16 | Nemauro      | 135 | DBJ Jersey           | Commercial agreement | For its unique non-invasive wireless continuous glucose monitoring Watch for the UK and Ireland.                                                                                                                           | 2014          |             | <a href="https://nemauromedical.com/nemauro-a-medical-announces-licensing-deal-with-db-pharma-jersey-ltd/">https://nemauromedical.com/nemauro-a-medical-announces-licensing-deal-with-db-pharma-jersey-ltd/</a>                                                                                         | 2020/8/16 |

| #  | Company name | #   | Partner company name | Contract style    | Purpose of contract                                                                                                                                                                                                                                                                                | Year of start | Year of end | Link of press release                                                                                                                                                                                                                                           | Accessed  |
|----|--------------|-----|----------------------|-------------------|----------------------------------------------------------------------------------------------------------------------------------------------------------------------------------------------------------------------------------------------------------------------------------------------------|---------------|-------------|-----------------------------------------------------------------------------------------------------------------------------------------------------------------------------------------------------------------------------------------------------------------|-----------|
| 18 | Livongo      | 137 | Teladoc              | M&A               | The highly complementary organizations will combine to create substantial value across the healthcare ecosystem, enabling clients everywhere to offer high quality, personalized, technology-enabled longitudinal care that improves outcomes and lowers costs across the full spectrum of health. | 2020          |             | <a href="https://ir.livongo.com/news-releases/news-release-details/teladoc-health-and-livongo-merge-create-new-standard-global">https://ir.livongo.com/news-releases/news-release-details/teladoc-health-and-livongo-merge-create-new-standard-global</a>       | 2020/8/16 |
| 18 | Livongo      | 138 | Prognos              | R&D Collaboration | To offer Members the ability to easily view their important clinical laboratory data on the Livongo platform. In addition, Livongo's AI+AI® engine is now powered by lab test values, delivering Members more personalized telehealth coaching interactions and Health Nudges™.                    | 2020          |             | <a href="https://ir.livongo.com/news-releases/news-release-details/livongo-partners-prognos-health-drive-more-personalized-health">https://ir.livongo.com/news-releases/news-release-details/livongo-partners-prognos-health-drive-more-personalized-health</a> | 2020/8/16 |
| 18 | Livongo      | 139 | MDLIVE               | Expansion         | Livongo expands its Whole Person Platform by providing the full spectrum of consumer-first digital and human support needed for successful chronic condition management.                                                                                                                           | 2019          |             | <a href="https://ir.livongo.com/news-releases/news-release-details/livongo-integrates-access-telehealth-support-people-living">https://ir.livongo.com/news-releases/news-release-details/livongo-integrates-access-telehealth-support-people-living</a>         | 2020/8/16 |

| #  | Company name | #   | Partner company name       | Contract style | Purpose of contract                                                                                                                                                       | Year of start | Year of end | Link of press release                                                                                                                                                                                                                                                                                               | Accessed  |
|----|--------------|-----|----------------------------|----------------|---------------------------------------------------------------------------------------------------------------------------------------------------------------------------|---------------|-------------|---------------------------------------------------------------------------------------------------------------------------------------------------------------------------------------------------------------------------------------------------------------------------------------------------------------------|-----------|
| 18 | Livongo      | 140 | Doctor On Demand           | Expansion      | Livongo expands its Whole Person Platform by providing the full spectrum of consumer-first digital and human support needed for successful chronic condition management.  | 2019          |             | <a href="https://ir.livongo.com/news-releases/news-release-details/livongo-integrates-access-telehealth-support-people-living">https://ir.livongo.com/news-releases/news-release-details/livongo-integrates-access-telehealth-support-people-living</a>                                                             | 2020/8/16 |
| 18 | Livongo      | 70  | Blue Cross and Blue Shield | Expansion      | Available to all Fully Insured Clients                                                                                                                                    | 2019          |             | <a href="https://ir.livongo.com/news-releases/news-release-details/livongo-expands-partnership-blue-cross-and-blue-shield-kansas">https://ir.livongo.com/news-releases/news-release-details/livongo-expands-partnership-blue-cross-and-blue-shield-kansas</a>                                                       | 2020/8/16 |
| 18 | Livongo      | 141 | VSP Vision Care            | Expansion      | The opportunity for mutual clients to provide their employees with important reminders to schedule their annual comprehensive eye exam with a VSP network doctor.         | 2019          |             | <a href="https://ir.livongo.com/news-releases/news-release-details/livongo-and-vsp-vision-care-partner-reduce-gaps-eye-care-people">https://ir.livongo.com/news-releases/news-release-details/livongo-and-vsp-vision-care-partner-reduce-gaps-eye-care-people</a>                                                   | 2020/8/16 |
| 20 | DarioHealth  | 142 | Williams Medical           | Expansion      | to make the DarioHealth Remote Patient Monitoring (RPM) digital therapeutics platform available to Healthcare Professionals (HCPs) across the United Kingdom and Ireland. | 2020          |             | <a href="https://dariohealth.investorroom.com/2020-07-20-DarioHealth-Enters-UK-Remote-Patient-Monitoring-RPM-Market-Through-Agreement-with-Williams-Medical">https://dariohealth.investorroom.com/2020-07-20-DarioHealth-Enters-UK-Remote-Patient-Monitoring-RPM-Market-Through-Agreement-with-Williams-Medical</a> | 2020/8/16 |

| #  | Company name | #   | Partner company name | Contract style       | Purpose of contract                                                                                                                                                                                          | Year of start | Year of end | Link of press release                                                                                                                                                                                                                                                                                                                                                     | Accessed  |
|----|--------------|-----|----------------------|----------------------|--------------------------------------------------------------------------------------------------------------------------------------------------------------------------------------------------------------|---------------|-------------|---------------------------------------------------------------------------------------------------------------------------------------------------------------------------------------------------------------------------------------------------------------------------------------------------------------------------------------------------------------------------|-----------|
| 20 | DarioHealth  | 143 | Dance Biopharm       | R&D Collaboration    | Dance Biopharm will integrate its gentle mist smart inhaler into DarioHealth's digital therapeutics platform to provide patients automated, real-time treatment data through an advanced mobile application. | 2019          |             | <a href="https://dariohealth.investorroom.com/2019-09-11-Dance-Biopharm-Partners-With-DarioHealth-to-Expand-Access-to-Digital-Therapeutics-Platform-for-Patients-With-Chronic-Diseases">https://dariohealth.investorroom.com/2019-09-11-Dance-Biopharm-Partners-With-DarioHealth-to-Expand-Access-to-Digital-Therapeutics-Platform-for-Patients-With-Chronic-Diseases</a> | 2020/8/16 |
| 20 | DarioHealth  | 144 | Glytec               | Expansion            | To allow DarioHealth's smart glucose meter (part of the Dario Blood Glucose Monitoring System) to transmit information to Glytec's Glucommander™ Outpatient software-as-a-medical-device.                    | 2019          |             | <a href="https://dariohealth.investorroom.com/2019-03-27-DarioHealth-Partners-With-Glytec-on-Outpatient-Diabetes-Management">https://dariohealth.investorroom.com/2019-03-27-DarioHealth-Partners-With-Glytec-on-Outpatient-Diabetes-Management</a>                                                                                                                       | 2020/8/16 |
| 20 | DarioHealth  | 145 | Better Living Now    | Commercial agreement | For distribution of the Dario® Blood Glucose Monitoring System and the DarioEngage digital health platform.                                                                                                  | 2019          |             | <a href="https://dariohealth.investorroom.com/2019-01-02-DarioHealth-Signs-National-Distribution-Deal-in-the-U-S-With-Better-Living-Now-for-Its-Digital-Health-Products">https://dariohealth.investorroom.com/2019-01-02-DarioHealth-Signs-National-Distribution-Deal-in-the-U-S-With-Better-Living-Now-for-Its-Digital-Health-Products</a>                               | 2020/8/16 |

| #  | Company name | #   | Partner company name | Contract style       | Purpose of contract                                                                                                                                                                              | Year of start | Year of end | Link of press release                                                                                                                                                                                                                                                                                                                                                                                       | Accessed  |
|----|--------------|-----|----------------------|----------------------|--------------------------------------------------------------------------------------------------------------------------------------------------------------------------------------------------|---------------|-------------|-------------------------------------------------------------------------------------------------------------------------------------------------------------------------------------------------------------------------------------------------------------------------------------------------------------------------------------------------------------------------------------------------------------|-----------|
| 20 | DarioHealth  | 146 | Giant Eagle          | Expansion            | Millions of Customers Will Be Able to Sign Up for Online Education and Rewards through the DarioHealth Blood Glucose Monitoring System and Smartphone Application.                               | 2018          |             | <a href="https://dariohealth.investorroom.com/2018-11-12-DarioHealths-Digital-Diabetes-Platform-to-be-Made-Available-to-4-6-Million-Customers-at-Giant-Eagle-One-of-Americas-Largest-Supermarket-Chains">https://dariohealth.investorroom.com/2018-11-12-DarioHealths-Digital-Diabetes-Platform-to-be-Made-Available-to-4-6-Million-Customers-at-Giant-Eagle-One-of-Americas-Largest-Supermarket-Chains</a> | 2020/8/16 |
| 20 | DarioHealth  | 147 | Byram Healthcare     | Expansion            | To accelerate market penetration in the insurance reimbursable market for DarioHealth's U.S. consumers.                                                                                          | 2017          |             | <a href="https://dariohealth.investorroom.com/2017-07-25-DarioHealth-Partners-with-Byram-Healthcare-to-Further-Expand-Insurance-Health-Coverage-for-U-S-Consumers">https://dariohealth.investorroom.com/2017-07-25-DarioHealth-Partners-with-Byram-Healthcare-to-Further-Expand-Insurance-Health-Coverage-for-U-S-Consumers</a>                                                                             | 2020/8/16 |
| 20 | DarioHealth  | 148 | CCS Medical          | Expansion            | DarioHealth is partnering with CCS Medical by providing live data access to CCS Medical for patients that join the LivingConnected clinical program using the DarioHealth native smartphone app. | 2017          |             | <a href="https://dariohealth.investorroom.com/PressReleases?item=149">https://dariohealth.investorroom.com/PressReleases?item=149</a>                                                                                                                                                                                                                                                                       | 2020/8/16 |
| 20 | DarioHealth  | 149 | GEMCO Medical        | Commercial agreement | To complement LabStyle's direct-to-consumer model to further expand and strengthen its presence in the United States.                                                                            | 2016          |             | <a href="https://dariohealth.investorroom.com/PressReleases?item=115">https://dariohealth.investorroom.com/PressReleases?item=115</a>                                                                                                                                                                                                                                                                       | 2020/8/16 |

| #  | Company name | #   | Partner company name          | Contract style       | Purpose of contract                                                                                                                           | Year of start | Year of end | Link of press release                                                                                                                                                                                                                                                                                                                                                                                                     | Accessed  |
|----|--------------|-----|-------------------------------|----------------------|-----------------------------------------------------------------------------------------------------------------------------------------------|---------------|-------------|---------------------------------------------------------------------------------------------------------------------------------------------------------------------------------------------------------------------------------------------------------------------------------------------------------------------------------------------------------------------------------------------------------------------------|-----------|
| 20 | DarioHealth  | 150 | Centaur Pharmaceuticals       | Commercial agreement | Exclusive distribution agreement with one of India's leading pharmaceutical and medical device networks, Centaur Pharmaceuticals Pvt. Ltd.    | 2015          |             | <a href="https://dariohealth.investorroom.com/2015-11-11-LabStyle-Innovations-Dario-Diabetes-Management-Solution-to-Launch-in-India-Through-Distribution-Agreement-with-Centaur-Pharmaceuticals">https://dariohealth.investorroom.com/2015-11-11-LabStyle-Innovations-Dario-Diabetes-Management-Solution-to-Launch-in-India-Through-Distribution-Agreement-with-Centaur-Pharmaceuticals</a>                               | 2020/8/16 |
| 20 | DarioHealth  | 151 | McCabi Healthcare             | Expansion            | To implement its comprehensive Dario™ digital suite for patients and professionals remote proactive care.                                     | 2015          |             | <a href="https://dariohealth.investorroom.com/2015-01-22-LabStyle-Innovations-Announces-HMO-Tele-Care-Partnership-Agreement">https://dariohealth.investorroom.com/2015-01-22-LabStyle-Innovations-Announces-HMO-Tele-Care-Partnership-Agreement</a>                                                                                                                                                                       | 2020/8/16 |
| 20 | DarioHealth  | 152 | uHealth Australia Pty Limited | Commercial agreement | To exclusively distribute in Australia the Dario™ blood glucose monitoring device, one of the three main components of the Dario™ platform.   | 2014          |             | <a href="https://dariohealth.investorroom.com/2014-02-04-LabStyle-Innovation-Signs-Agreement-with-uHealth-to-Exclusively-Distribute-the-Dario-Blood-Glucose-Monitoring-Device-in-Australia">https://dariohealth.investorroom.com/2014-02-04-LabStyle-Innovation-Signs-Agreement-with-uHealth-to-Exclusively-Distribute-the-Dario-Blood-Glucose-Monitoring-Device-in-Australia</a>                                         | 2020/8/16 |
| 20 | DarioHealth  | 153 | InnoMed Ltd.                  | Commercial agreement | Exclusive agreement with InnoMed Ltd. to distribute the Dario™ diabetes management platform's blood glucose monitoring device in New Zealand. | 2013          |             | <a href="https://dariohealth.investorroom.com/2013-11-19-LabStyle-Innovations-Signs-InnoMed-to-Exclusively-Distribute-the-Dario-Diabetes-Management-Platforms-Blood-Glucose-Monitoring-Device-in-New-Zealand,1">https://dariohealth.investorroom.com/2013-11-19-LabStyle-Innovations-Signs-InnoMed-to-Exclusively-Distribute-the-Dario-Diabetes-Management-Platforms-Blood-Glucose-Monitoring-Device-in-New-Zealand,1</a> | 2020/8/16 |

| #  | Company name | #   | Partner company name | Contract style       | Purpose of contract                                                                                                                                    | Year of start | Year of end | Link of press release                                                                                                                                                                             | Accessed  |
|----|--------------|-----|----------------------|----------------------|--------------------------------------------------------------------------------------------------------------------------------------------------------|---------------|-------------|---------------------------------------------------------------------------------------------------------------------------------------------------------------------------------------------------|-----------|
| 20 | DarioHealth  | 154 | Farla Medical, Inc.  | Commercial agreement | Exclusive distribution agreement for Dario with Farla Medical, Inc., a leading medical supplies distributor based in the United Kingdom.               | 2013          | 2016        | <a href="https://dariohealth.investorroom.com/PressReleases?item=15">https://dariohealth.investorroom.com/PressReleases?item=15</a>                                                               | 2020/8/16 |
| 21 | Senseonics   | 101 | Companion Medical    | R&D Collaboration    | To integrate Eversense® CGM System real-time glucose data with the Companion Medical InPen™ smart system for insulin delivery.                         | 2020          |             | <a href="https://www.senseonics.com/tools/viewpdf.aspx?page={CDA67309-C43A-486E-94DE-1593F516984B}">https://www.senseonics.com/tools/viewpdf.aspx?page={CDA67309-C43A-486E-94DE-1593F516984B}</a> | 2020/8/16 |
| 21 | Senseonics   | 155 | Geo-Med, LLC         | Expansion            | To provide access to Eversense CGM to more than 9 million covered veterans and U.S. government personnel.                                              | 2019          |             | <a href="https://www.senseonics.com/investor-relations/news-releases/2019/02-14-2019-000239867">https://www.senseonics.com/investor-relations/news-releases/2019/02-14-2019-000239867</a>         | 2020/8/16 |
| 21 | Senseonics   | 2   | Hoffmann-La Roche    | Commercial agreement | Extension of its distribution agreement with Roche Diabetes Care. As extended, the agreement now runs through January 31, 2021.                        | 2019          | 2021        | <a href="https://www.senseonics.com/tools/viewpdf.aspx?page={763AB233-737B-40A4-AE1A-BF5C43062F0A}">https://www.senseonics.com/tools/viewpdf.aspx?page={763AB233-737B-40A4-AE1A-BF5C43062F0A}</a> | 2020/8/16 |
| 21 | Senseonics   | 37  | Glooko               | R&D Collaboration    | To enable integration of the long-term Eversense® branded continuous glucose monitoring (CGM) systems with Glooko's diabetes data management platform. | 2018          |             | <a href="https://www.senseonics.com/tools/viewpdf.aspx?page={9436B725-810F-41FE-9210-4312CD71AE96}">https://www.senseonics.com/tools/viewpdf.aspx?page={9436B725-810F-41FE-9210-4312CD71AE96}</a> | 2020/8/16 |

| #  | Company name | #   | Partner company name | Contract style       | Purpose of contract                                                                                                                                     | Year of start | Year of end | Link of press release                                                                                                                                                                             | Accessed  |
|----|--------------|-----|----------------------|----------------------|---------------------------------------------------------------------------------------------------------------------------------------------------------|---------------|-------------|---------------------------------------------------------------------------------------------------------------------------------------------------------------------------------------------------|-----------|
| 21 | Senseonics   | 156 | Beta Bionics         | R&D Collaboration    | To integrate glucose data from the Eversense® Continuous Glucose Monitoring (CGM) system into the iLet Bionic Pancreas system.                          | 2018          |             | <a href="https://www.senseonics.com/investor-relations/news-releases/2018/06-07-2018-134344074">https://www.senseonics.com/investor-relations/news-releases/2018/06-07-2018-134344074</a>         | 2020/8/16 |
| 21 | Senseonics   | 2   | Hoffmann-La Roche    | Commercial agreement | Exclusive rights to promote, market, and sell the Eversense product line to diabetes clinics and patients in the covered territories.                   | 2016          |             | <a href="https://www.senseonics.com/tools/viewpdf.aspx?page={11BF0B77-DC0C-4CAA-A548-CD5A5CE5F5FD}">https://www.senseonics.com/tools/viewpdf.aspx?page={11BF0B77-DC0C-4CAA-A548-CD5A5CE5F5FD}</a> | 2020/8/16 |
| 21 | Senseonics   | 90  | Diasend              | R&D Collaboration    | To enable clinicians and patients to utilize the diasend® solution to review past Eversense CGM data along with insulin pump and activity tracker data. | 2016          |             | <a href="https://www.senseonics.com/tools/viewpdf.aspx?page={97387BF6-3870-4774-B2EA-438089DBEBD6}">https://www.senseonics.com/tools/viewpdf.aspx?page={97387BF6-3870-4774-B2EA-438089DBEBD6}</a> | 2020/8/16 |
| 21 | Senseonics   | 157 | ASN Technologies     | M&A                  | Development and commercialization of long-term, implantable continuous glucose monitoring system for people with diabetes                               | 2015          |             | <a href="https://www.senseonics.com/investor-relations/news-releases/2015/11-12-2015">https://www.senseonics.com/investor-relations/news-releases/2015/11-12-2015</a>                             | 2020/8/16 |
| 21 | Senseonics   | 85  | Rubin Medical        | Commercial agreement | Exclusive distribution agreement of the Senseonics' CGM system in Sweden, Norway and Denmark.                                                           | 2015          |             | <a href="https://www.senseonics.com/investor-relations/news-releases/2015/06-05-2015">https://www.senseonics.com/investor-relations/news-releases/2015/06-05-2015</a>                             | 2020/8/16 |

| #  | Company name       | #   | Partner company name     | Contract style    | Purpose of contract                                                                                                                                                                         | Year of start | Year of end | Link of press release                                                                                                                                       | Accessed  |
|----|--------------------|-----|--------------------------|-------------------|---------------------------------------------------------------------------------------------------------------------------------------------------------------------------------------------|---------------|-------------|-------------------------------------------------------------------------------------------------------------------------------------------------------------|-----------|
| 22 | Bigfoot Biomedical | 158 | Allegheny Health Network | R&D Collaboration | To further advance Bigfoot Biomedical' s first-in-kind data-driven solutions for optimizing the dosing and delivery of insulin for people with diabetes.                                    | 2019          |             | <a href="https://www.bigfootbiomedical.com/allegheny-health-network-partnership">https://www.bigfootbiomedical.com/allegheny-health-network-partnership</a> | 2020/8/17 |
| 22 | Bigfoot Biomedical | 159 | Owen Mumford             | Expansion         | To support inclusion of Owen Mumford' s family of Unifine® Pen Needles into Bigfoot' s in-development connected injection system subscription supply bundles.                               | 2019          |             | <a href="https://www.bigfootbiomedical.com/owen-mumford-agreement">https://www.bigfootbiomedical.com/owen-mumford-agreement</a>                             | 2020/8/17 |
| 22 | Bigfoot Biomedical | 107 | Eli Lilly                | R&D Collaboration | To support integration of Lilly' s insulin products into Bigfoot' s systems currently in development.                                                                                       | 2019          |             | <a href="https://www.bigfootbiomedical.com/lilly-agreement">https://www.bigfootbiomedical.com/lilly-agreement</a>                                           | 2020/8/17 |
| 22 | Bigfoot Biomedical | 125 | Ypsomed                  | R&D Collaboration | To supply Bigfoot with a customized proprietary version of its Orbit® infusion sets as part of Bigfoot' s investigational automated insulin pump-based solution for use in a pivotal trial. | 2017          |             | <a href="https://www.bigfootbiomedical.com/ypsomed-agreement">https://www.bigfootbiomedical.com/ypsomed-agreement</a>                                       | 2020/8/17 |

| #  | Company name       | #   | Partner company name  | Contract style    | Purpose of contract                                                                                                                                                                                      | Year of start | Year of end | Link of press release                                                                                                                                                                                                                                                                                                                           | Accessed  |
|----|--------------------|-----|-----------------------|-------------------|----------------------------------------------------------------------------------------------------------------------------------------------------------------------------------------------------------|---------------|-------------|-------------------------------------------------------------------------------------------------------------------------------------------------------------------------------------------------------------------------------------------------------------------------------------------------------------------------------------------------|-----------|
| 22 | Bigfoot Biomedical | 6   | Dexcom Inc.           | R&D Collaboration | To enable glucose data to travel seamlessly from the Dexcom transmitter into the Bigfoot system to enable automated delivery of insulin for people with T1D.                                             | 2015          |             | <a href="https://www.bigfootbiomedical.com/dexcom-partnership">https://www.bigfootbiomedical.com/dexcom-partnership</a>                                                                                                                                                                                                                         | 2020/8/17 |
| 22 | Bigfoot Biomedical | 160 | Asante Solutions      | M&A               | To enable the development of the insulin pump component of the Bigfoot automated insulin delivery system.                                                                                                | 2015          |             | <a href="https://www.bigfootbiomedical.com/asante-acquisition">https://www.bigfootbiomedical.com/asante-acquisition</a>                                                                                                                                                                                                                         | 2020/8/17 |
| 23 | fitbit             | 161 | WellCare Health Plans | Expansion         | To deliver Fitbit devices to WellCare Medicaid members in Georgia who take positive steps to manage their diabetes by completing their annual diabetic eye exams.                                        | 2019          |             | <a href="https://investor.fitbit.com/press-releases/press-release-details/2019/WellCare-Joins-Forces-with-Fitbit-to-Help-Manage-Diabetes-in-Georgia/default.aspx">https://investor.fitbit.com/press-releases/press-release-details/2019/WellCare-Joins-Forces-with-Fitbit-to-Help-Manage-Diabetes-in-Georgia/default.aspx</a>                   | 2020/8/17 |
| 23 | fitbit             | 162 | Solera Health         | Expansion         | To reduce the risk of type 2 diabetes by using the Fitbit platform through Solera Health's innovative model to encourage positive behavior changes, such as increased physical activity and weight loss. | 2019          |             | <a href="https://investor.fitbit.com/press-releases/press-release-details/2019/Fitbit-and-Solera-Health-Expand-Partnership-to-Reduce-Risk-of-Type-2-Diabetes/default.aspx">https://investor.fitbit.com/press-releases/press-release-details/2019/Fitbit-and-Solera-Health-Expand-Partnership-to-Reduce-Risk-of-Type-2-Diabetes/default.aspx</a> | 2020/8/17 |

| #  | Company name      | #   | Partner company name | Contract style       | Purpose of contract                                                                                                                                                                                    | Year of start | Year of end | Link of press release                                                                                                                                                                                                                                                                                                                                                                                   | Accessed  |
|----|-------------------|-----|----------------------|----------------------|--------------------------------------------------------------------------------------------------------------------------------------------------------------------------------------------------------|---------------|-------------|---------------------------------------------------------------------------------------------------------------------------------------------------------------------------------------------------------------------------------------------------------------------------------------------------------------------------------------------------------------------------------------------------------|-----------|
| 23 | fitbit            | 6   | Dexcom Inc.          | R&D<br>Collaboration | To develop and market products to help people better manage their diabetes and get a more complete picture of their overall health with easy-to-use mobile tools.                                      | 2017          |             | <a href="https://investor.fitbit.com/press-releases/press-release-details/2017/Fitbit-and-Dexcom-to-Develop-Continuous-Glucose-Monitoring-CGM-Experience-for-People-Living-with-Diabetes/default.aspx">https://investor.fitbit.com/press-releases/press-release-details/2017/Fitbit-and-Dexcom-to-Develop-Continuous-Glucose-Monitoring-CGM-Experience-for-People-Living-with-Diabetes/default.aspx</a> | 2020/8/17 |
| 24 | GARMIN            | 163 | Cardiogram           | Expansion            | Cardiogram heart health app is now compatible with all Garmin wearables featuring optical heart rate, including many of the latest fēnix®, Forerunner®, and vivo series devices.                       | 2018          |             | <a href="https://newsroom.garmin.com/newsroom/press-release-details/2018/Garmin-Health-and-Cardiogram-announce-integration-of-Cardiogram-Heart-Health-app-and-Garmin-wearables/default.aspx">https://newsroom.garmin.com/newsroom/press-release-details/2018/Garmin-Health-and-Cardiogram-announce-integration-of-Cardiogram-Heart-Health-app-and-Garmin-wearables/default.aspx</a>                     | 2020/8/17 |
| 26 | IBM Watson Health | 164 | Agfa HealthCare      | R&D<br>Collaboration | To bring cognitive imaging into daily practice to help doctors address breast, lung, and other cancers; diabetes; eye health; brain disease; and heart disease and related conditions, such as stroke. | 2016          |             | <a href="https://www-03.ibm.com/press/us/en/pressrelease/49985.wss">https://www-03.ibm.com/press/us/en/pressrelease/49985.wss</a>                                                                                                                                                                                                                                                                       | 2020/8/17 |

| #  | Company name      | #   | Partner company name            | Contract style    | Purpose of contract                                                                                                                                                                                    | Year of start | Year of end | Link of press release                                                                                                             | Accessed  |
|----|-------------------|-----|---------------------------------|-------------------|--------------------------------------------------------------------------------------------------------------------------------------------------------------------------------------------------------|---------------|-------------|-----------------------------------------------------------------------------------------------------------------------------------|-----------|
| 26 | IBM Watson Health | 165 | Anne Arundel Medical Center     | R&D Collaboration | To bring cognitive imaging into daily practice to help doctors address breast, lung, and other cancers; diabetes; eye health; brain disease; and heart disease and related conditions, such as stroke. | 2016          |             | <a href="https://www-03.ibm.com/press/us/en/pressrelease/49985.wss">https://www-03.ibm.com/press/us/en/pressrelease/49985.wss</a> | 2020/8/17 |
| 26 | IBM Watson Health | 166 | Baptist Health South Florida    | R&D Collaboration | To bring cognitive imaging into daily practice to help doctors address breast, lung, and other cancers; diabetes; eye health; brain disease; and heart disease and related conditions, such as stroke. | 2016          |             | <a href="https://www-03.ibm.com/press/us/en/pressrelease/49985.wss">https://www-03.ibm.com/press/us/en/pressrelease/49985.wss</a> | 2020/8/17 |
| 26 | IBM Watson Health | 167 | Eastern Virginia Medical School | R&D Collaboration | To bring cognitive imaging into daily practice to help doctors address breast, lung, and other cancers; diabetes; eye health; brain disease; and heart disease and related conditions, such as stroke. | 2016          |             | <a href="https://www-03.ibm.com/press/us/en/pressrelease/49985.wss">https://www-03.ibm.com/press/us/en/pressrelease/49985.wss</a> | 2020/8/17 |
| 26 | IBM Watson Health | 168 | Hologic, Inc.                   | R&D Collaboration | To bring cognitive imaging into daily practice to help doctors address breast, lung, and other cancers; diabetes; eye health; brain disease; and heart disease and related conditions, such as stroke. | 2016          |             | <a href="https://www-03.ibm.com/press/us/en/pressrelease/49985.wss">https://www-03.ibm.com/press/us/en/pressrelease/49985.wss</a> | 2020/8/17 |

| #  | Company name      | #   | Partner company name                  | Contract style    | Purpose of contract                                                                                                                                                                                    | Year of start | Year of end | Link of press release                                                                                                             | Accessed  |
|----|-------------------|-----|---------------------------------------|-------------------|--------------------------------------------------------------------------------------------------------------------------------------------------------------------------------------------------------|---------------|-------------|-----------------------------------------------------------------------------------------------------------------------------------|-----------|
| 26 | IBM Watson Health | 169 | ifa systems AG                        | R&D Collaboration | To bring cognitive imaging into daily practice to help doctors address breast, lung, and other cancers; diabetes; eye health; brain disease; and heart disease and related conditions, such as stroke. | 2016          |             | <a href="https://www-03.ibm.com/press/us/en/pressrelease/49985.wss">https://www-03.ibm.com/press/us/en/pressrelease/49985.wss</a> | 2020/8/17 |
| 26 | IBM Watson Health | 170 | inoveon                               | R&D Collaboration | To bring cognitive imaging into daily practice to help doctors address breast, lung, and other cancers; diabetes; eye health; brain disease; and heart disease and related conditions, such as stroke. | 2016          |             | <a href="https://www-03.ibm.com/press/us/en/pressrelease/49985.wss">https://www-03.ibm.com/press/us/en/pressrelease/49985.wss</a> | 2020/8/17 |
| 26 | IBM Watson Health | 171 | Radiology Associates of South Florida | R&D Collaboration | To bring cognitive imaging into daily practice to help doctors address breast, lung, and other cancers; diabetes; eye health; brain disease; and heart disease and related conditions, such as stroke. | 2016          |             | <a href="https://www-03.ibm.com/press/us/en/pressrelease/49985.wss">https://www-03.ibm.com/press/us/en/pressrelease/49985.wss</a> | 2020/8/17 |
| 26 | IBM Watson Health | 172 | Sentara Healthcare                    | R&D Collaboration | To bring cognitive imaging into daily practice to help doctors address breast, lung, and other cancers; diabetes; eye health; brain disease; and heart disease and related conditions, such as stroke. | 2016          |             | <a href="https://www-03.ibm.com/press/us/en/pressrelease/49985.wss">https://www-03.ibm.com/press/us/en/pressrelease/49985.wss</a> | 2020/8/17 |

| #  | Company name      | #   | Partner company name              | Contract style    | Purpose of contract                                                                                                                                                                                    | Year of start | Year of end | Link of press release                                                                                                             | Accessed  |
|----|-------------------|-----|-----------------------------------|-------------------|--------------------------------------------------------------------------------------------------------------------------------------------------------------------------------------------------------|---------------|-------------|-----------------------------------------------------------------------------------------------------------------------------------|-----------|
| 26 | IBM Watson Health | 173 | Sheridan Healthcare               | R&D Collaboration | To bring cognitive imaging into daily practice to help doctors address breast, lung, and other cancers; diabetes; eye health; brain disease; and heart disease and related conditions, such as stroke. | 2016          |             | <a href="https://www-03.ibm.com/press/us/en/pressrelease/49985.wss">https://www-03.ibm.com/press/us/en/pressrelease/49985.wss</a> | 2020/8/17 |
| 26 | IBM Watson Health | 174 | Topcon                            | R&D Collaboration | To bring cognitive imaging into daily practice to help doctors address breast, lung, and other cancers; diabetes; eye health; brain disease; and heart disease and related conditions, such as stroke. | 2016          |             | <a href="https://www-03.ibm.com/press/us/en/pressrelease/49985.wss">https://www-03.ibm.com/press/us/en/pressrelease/49985.wss</a> | 2020/8/17 |
| 26 | IBM Watson Health | 175 | UC San Diego Health               | R&D Collaboration | To bring cognitive imaging into daily practice to help doctors address breast, lung, and other cancers; diabetes; eye health; brain disease; and heart disease and related conditions, such as stroke. | 2016          |             | <a href="https://www-03.ibm.com/press/us/en/pressrelease/49985.wss">https://www-03.ibm.com/press/us/en/pressrelease/49985.wss</a> | 2020/8/17 |
| 26 | IBM Watson Health | 176 | University of Miami Health System | R&D Collaboration | To bring cognitive imaging into daily practice to help doctors address breast, lung, and other cancers; diabetes; eye health; brain disease; and heart disease and related conditions, such as stroke. | 2016          |             | <a href="https://www-03.ibm.com/press/us/en/pressrelease/49985.wss">https://www-03.ibm.com/press/us/en/pressrelease/49985.wss</a> | 2020/8/17 |

| #  | Company name      | #   | Partner company name                 | Contract style    | Purpose of contract                                                                                                                                                                                    | Year of start | Year of end | Link of press release                                                                                                             | Accessed  |
|----|-------------------|-----|--------------------------------------|-------------------|--------------------------------------------------------------------------------------------------------------------------------------------------------------------------------------------------------|---------------|-------------|-----------------------------------------------------------------------------------------------------------------------------------|-----------|
| 26 | IBM Watson Health | 177 | University of Vermont Health Network | R&D Collaboration | To bring cognitive imaging into daily practice to help doctors address breast, lung, and other cancers; diabetes; eye health; brain disease; and heart disease and related conditions, such as stroke. | 2016          |             | <a href="https://www-03.ibm.com/press/us/en/pressrelease/49985.wss">https://www-03.ibm.com/press/us/en/pressrelease/49985.wss</a> | 2020/8/17 |
| 26 | IBM Watson Health | 178 | vRad                                 | R&D Collaboration | To bring cognitive imaging into daily practice to help doctors address breast, lung, and other cancers; diabetes; eye health; brain disease; and heart disease and related conditions, such as stroke. | 2016          |             | <a href="https://www-03.ibm.com/press/us/en/pressrelease/49985.wss">https://www-03.ibm.com/press/us/en/pressrelease/49985.wss</a> | 2020/8/17 |
| 26 | IBM Watson Health | 179 | Merge Healthcare                     | R&D Collaboration | To bring cognitive imaging into daily practice to help doctors address breast, lung, and other cancers; diabetes; eye health; brain disease; and heart disease and related conditions, such as stroke. | 2016          |             | <a href="https://www-03.ibm.com/press/us/en/pressrelease/49985.wss">https://www-03.ibm.com/press/us/en/pressrelease/49985.wss</a> | 2020/8/17 |
| 26 | IBM Watson Health | 180 | American Diabetes Association        | R&D Collaboration | Long-term collaboration to bring together the cognitive computing power of Watson and the Association's vast repository of clinical and research data.                                                 | 2016          |             | <a href="https://www-03.ibm.com/press/us/en/pressrelease/49903.wss">https://www-03.ibm.com/press/us/en/pressrelease/49903.wss</a> | 2020/8/17 |

| #  | Company name      | #   | Partner company name | Contract style    | Purpose of contract                                                                                                                                                                                                | Year of start | Year of end | Link of press release                                                                                                             | Accessed  |
|----|-------------------|-----|----------------------|-------------------|--------------------------------------------------------------------------------------------------------------------------------------------------------------------------------------------------------------------|---------------|-------------|-----------------------------------------------------------------------------------------------------------------------------------|-----------|
| 26 | IBM Watson Health | 38  | Apple                | R&D Collaboration | To arm medical researchers with a secure, open data storage solution, as well as access to IBM' s most sophisticated data analytics capabilities.                                                                  | 2015          |             | <a href="https://www-03.ibm.com/press/us/en/pressrelease/46583.wss">https://www-03.ibm.com/press/us/en/pressrelease/46583.wss</a> | 2020/8/17 |
| 26 | IBM Watson Health | 181 | Explorys             | M&A               | The acquisition strengthens IBM' s leadership position in healthcare analytics and cloud computing, and will help bolster its ability to extract and share deep insights to improve wellness and benefit patients. | 2015          |             | <a href="https://www-03.ibm.com/press/us/en/pressrelease/46585.wss">https://www-03.ibm.com/press/us/en/pressrelease/46585.wss</a> | 2020/8/17 |
| 26 | IBM Watson Health | 60  | Johnson & Johnson    | R&D Collaboration | Plans to collaborate around a new generation of intelligent virtual coaching solutions and applications designed to transform the patient experience and deliver improved health outcomes.                         | 2015          |             | <a href="https://www-03.ibm.com/press/us/en/pressrelease/46582.wss">https://www-03.ibm.com/press/us/en/pressrelease/46582.wss</a> | 2020/8/17 |

| #  | Company name      | #   | Partner company name | Contract style | Purpose of contract                                                                                                                                                                                                       | Year of start | Year of end | Link of press release                                                                                                                                                                                                                                                                                                                                                   | Accessed  |
|----|-------------------|-----|----------------------|----------------|---------------------------------------------------------------------------------------------------------------------------------------------------------------------------------------------------------------------------|---------------|-------------|-------------------------------------------------------------------------------------------------------------------------------------------------------------------------------------------------------------------------------------------------------------------------------------------------------------------------------------------------------------------------|-----------|
| 26 | IBM Watson Health | 182 | Phytel               | M&A            | To support our goal to advance the quality and effectiveness of personal healthcare by enabling secure access to individualized insights and a more complete picture of the many factors that can affect people' s health | 2015          |             | <a href="https://www-03.ibm.com/press/us/en/pressrelease/46767.wss">https://www-03.ibm.com/press/us/en/pressrelease/46767.wss</a>                                                                                                                                                                                                                                       | 2020/8/17 |
| 27 | Verily            | 100 | John Hancock         | Expansion      | Providing Personalized Diabetes Support and Management Program Paired with the Protection of Life Insurance and the Potential to Earn up to 25% in Premium Savings                                                        | 2019          |             | <a href="https://kstatic.googleusercontent.com/files/5d668245c417aa32eb9a9b1029b9f05171f27077cc9806c9fe98c202c6a03c56ab5b17510b28631e49d0efb46096e183ff240ef8ead50c026486581873091667">https://kstatic.googleusercontent.com/files/5d668245c417aa32eb9a9b1029b9f05171f27077cc9806c9fe98c202c6a03c56ab5b17510b28631e49d0efb46096e183ff240ef8ead50c026486581873091667</a> | 2020/8/17 |
| 27 | Verily            | 183 | Onduo                | Expansion      | Providing Personalized Diabetes Support and Management Program Paired with the Protection of Life Insurance and the Potential to Earn up to 25% in Premium Savings                                                        | 2019          |             | <a href="https://kstatic.googleusercontent.com/files/5d668245c417aa32eb9a9b1029b9f05171f27077cc9806c9fe98c202c6a03c56ab5b17510b28631e49d0efb46096e183ff240ef8ead50c026486581873091667">https://kstatic.googleusercontent.com/files/5d668245c417aa32eb9a9b1029b9f05171f27077cc9806c9fe98c202c6a03c56ab5b17510b28631e49d0efb46096e183ff240ef8ead50c026486581873091667</a> | 2020/8/17 |

| #  | Company name | #   | Partner company name                                                | Contract style       | Purpose of contract                                                                                                                                                                                         | Year of start | Year of end | Link of press release                                                                                                                                                                                                                                                                                                                                                   | Accessed  |
|----|--------------|-----|---------------------------------------------------------------------|----------------------|-------------------------------------------------------------------------------------------------------------------------------------------------------------------------------------------------------------|---------------|-------------|-------------------------------------------------------------------------------------------------------------------------------------------------------------------------------------------------------------------------------------------------------------------------------------------------------------------------------------------------------------------------|-----------|
| 27 | Verily       | 184 | Veterans Administration<br>Palo Alto<br>Healthcare System (VAPAHCS) | R&D<br>Collaboration | To evaluate and deploy new tools and interventions aimed at optimizing care delivery. The partnerships leverage Verily' s deep experience in data ingestion, analytics, behavioral activation and product d | 2019          |             | <a href="https://kstatic.googleusercontent.com/files/dcbfe04c6e2f7aec23bd1b321d189f32f49eac6ad85e6b09988c20c854adae0bd9ec1dff6e786bc49ea8f5d51b7dc7fbd5375921899cc0547f64f205c4197ce1">https://kstatic.googleusercontent.com/files/dcbfe04c6e2f7aec23bd1b321d189f32f49eac6ad85e6b09988c20c854adae0bd9ec1dff6e786bc49ea8f5d51b7dc7fbd5375921899cc0547f64f205c4197ce1</a> | 2020/8/17 |
| 27 | Verily       | 185 | Atrius Health                                                       | R&D<br>Collaboration | To evaluate and deploy new tools and interventions aimed at optimizing care delivery. The partnerships leverage Verily' s deep experience in data ingestion, analytics, behavioral activation and product d | 2019          |             | <a href="https://kstatic.googleusercontent.com/files/dcbfe04c6e2f7aec23bd1b321d189f32f49eac6ad85e6b09988c20c854adae0bd9ec1dff6e786bc49ea8f5d51b7dc7fbd5375921899cc0547f64f205c4197ce1">https://kstatic.googleusercontent.com/files/dcbfe04c6e2f7aec23bd1b321d189f32f49eac6ad85e6b09988c20c854adae0bd9ec1dff6e786bc49ea8f5d51b7dc7fbd5375921899cc0547f64f205c4197ce1</a> | 2020/8/17 |
| 27 | Verily       | 186 | Novartis                                                            | R&D<br>Collaboration | Strategic alliance to develop digitally innovative, patient-centered clinical research programs using Project Baseline' s evidence generation platform and tools.                                           | 2019          |             | <a href="https://kstatic.googleusercontent.com/files/545d4521447b18cfdc6581c590f8c742346ab2799b1870e9642748a243908de79387c518e06262457e0f62f7473dcf7d1a688fd6b2a64611b4cb031bca88597f">https://kstatic.googleusercontent.com/files/545d4521447b18cfdc6581c590f8c742346ab2799b1870e9642748a243908de79387c518e06262457e0f62f7473dcf7d1a688fd6b2a64611b4cb031bca88597f</a> | 2020/8/17 |

| #  | Company name | #   | Partner company name          | Contract style    | Purpose of contract                                                                                                                                                                                         | Year of start | Year of end | Link of press release                                                                                                                                                                                                                                                                                                                                                   | Accessed  |
|----|--------------|-----|-------------------------------|-------------------|-------------------------------------------------------------------------------------------------------------------------------------------------------------------------------------------------------------|---------------|-------------|-------------------------------------------------------------------------------------------------------------------------------------------------------------------------------------------------------------------------------------------------------------------------------------------------------------------------------------------------------------------------|-----------|
| 27 | Verily       | 187 | Otsuka                        | R&D Collaboration | Strategic alliance to develop digitally innovative, patient-centered clinical research programs using Project Baseline' s evidence generation platform and tools.                                           | 2019          |             | <a href="https://kstatic.googleusercontent.com/files/545d4521447b18cfdc6581c590f8c742346ab2799b1870e9642748a243908de79387c518e06262457e0f62f7473dcf7d1a688fd6b2a64611b4cb031bca88597f">https://kstatic.googleusercontent.com/files/545d4521447b18cfdc6581c590f8c742346ab2799b1870e9642748a243908de79387c518e06262457e0f62f7473dcf7d1a688fd6b2a64611b4cb031bca88597f</a> | 2020/8/17 |
| 27 | Verily       | 188 | Pfizer                        | R&D Collaboration | Strategic alliance to develop digitally innovative, patient-centered clinical research programs using Project Baseline' s evidence generation platform and tools.                                           | 2019          |             | <a href="https://kstatic.googleusercontent.com/files/545d4521447b18cfdc6581c590f8c742346ab2799b1870e9642748a243908de79387c518e06262457e0f62f7473dcf7d1a688fd6b2a64611b4cb031bca88597f">https://kstatic.googleusercontent.com/files/545d4521447b18cfdc6581c590f8c742346ab2799b1870e9642748a243908de79387c518e06262457e0f62f7473dcf7d1a688fd6b2a64611b4cb031bca88597f</a> | 2020/8/17 |
| 27 | Verily       | 76  | Sanofi                        | R&D Collaboration | Strategic alliance to develop digitally innovative, patient-centered clinical research programs using Project Baseline' s evidence generation platform and tools.                                           | 2019          |             | <a href="https://kstatic.googleusercontent.com/files/545d4521447b18cfdc6581c590f8c742346ab2799b1870e9642748a243908de79387c518e06262457e0f62f7473dcf7d1a688fd6b2a64611b4cb031bca88597f">https://kstatic.googleusercontent.com/files/545d4521447b18cfdc6581c590f8c742346ab2799b1870e9642748a243908de79387c518e06262457e0f62f7473dcf7d1a688fd6b2a64611b4cb031bca88597f</a> | 2020/8/17 |
| 27 | Verily       | 189 | Duke University Health System | R&D Collaboration | To identify and develop solutions to significant challenges in clinical research, including making research more accessible and engaging for patients, clinicians, researchers and research sponsors alike. | 2019          |             | <a href="https://kstatic.googleusercontent.com/files/74ff9109b3a1c60801d44250fd34fbbfafcdad4be13125f6a8d63fc385a3475e5e3538e93fa63a4e29b0011c16e39e720f7ab19ae2f9f5e19dde0992371a8b9">https://kstatic.googleusercontent.com/files/74ff9109b3a1c60801d44250fd34fbbfafcdad4be13125f6a8d63fc385a3475e5e3538e93fa63a4e29b0011c16e39e720f7ab19ae2f9f5e19dde0992371a8b9</a>   | 2020/8/17 |

| #  | Company name | #   | Partner company name                     | Contract style    | Purpose of contract                                                                                                                                                                                         | Year of start | Year of end | Link of press release                                                                                                                                                                                                                                                                                                                                                 | Accessed  |
|----|--------------|-----|------------------------------------------|-------------------|-------------------------------------------------------------------------------------------------------------------------------------------------------------------------------------------------------------|---------------|-------------|-----------------------------------------------------------------------------------------------------------------------------------------------------------------------------------------------------------------------------------------------------------------------------------------------------------------------------------------------------------------------|-----------|
| 27 | Verily       | 190 | Vanderbilt University Medical Center     | R&D Collaboration | To identify and develop solutions to significant challenges in clinical research, including making research more accessible and engaging for patients, clinicians, researchers and research sponsors alike. | 2019          |             | <a href="https://kstatic.googleusercontent.com/files/74ff9109b3alc60801d44250fd34fbbfafcdad4be13125f6a8d63fc385a3475e5e3538e93fa63a4e29b0011c16e39e720f7ab19ae2f9f5e19dde0992371a8b9">https://kstatic.googleusercontent.com/files/74ff9109b3alc60801d44250fd34fbbfafcdad4be13125f6a8d63fc385a3475e5e3538e93fa63a4e29b0011c16e39e720f7ab19ae2f9f5e19dde0992371a8b9</a> | 2020/8/17 |
| 27 | Verily       | 191 | University of Mississippi Medical Center | R&D Collaboration | To identify and develop solutions to significant challenges in clinical research, including making research more accessible and engaging for patients, clinicians, researchers and research sponsors alike. | 2019          |             | <a href="https://kstatic.googleusercontent.com/files/74ff9109b3alc60801d44250fd34fbbfafcdad4be13125f6a8d63fc385a3475e5e3538e93fa63a4e29b0011c16e39e720f7ab19ae2f9f5e19dde0992371a8b9">https://kstatic.googleusercontent.com/files/74ff9109b3alc60801d44250fd34fbbfafcdad4be13125f6a8d63fc385a3475e5e3538e93fa63a4e29b0011c16e39e720f7ab19ae2f9f5e19dde0992371a8b9</a> | 2020/8/17 |
| 27 | Verily       | 192 | Mayo Clinic                              | R&D Collaboration | To identify and develop solutions to significant challenges in clinical research, including making research more accessible and engaging for patients, clinicians, researchers and research sponsors alike. | 2019          |             | <a href="https://kstatic.googleusercontent.com/files/74ff9109b3alc60801d44250fd34fbbfafcdad4be13125f6a8d63fc385a3475e5e3538e93fa63a4e29b0011c16e39e720f7ab19ae2f9f5e19dde0992371a8b9">https://kstatic.googleusercontent.com/files/74ff9109b3alc60801d44250fd34fbbfafcdad4be13125f6a8d63fc385a3475e5e3538e93fa63a4e29b0011c16e39e720f7ab19ae2f9f5e19dde0992371a8b9</a> | 2020/8/17 |

| #  | Company name | #   | Partner company name            | Contract style    | Purpose of contract                                                                                                                                                                                         | Year of start | Year of end | Link of press release                                                                                                                                                                                                                                                                                                                                                   | Accessed  |
|----|--------------|-----|---------------------------------|-------------------|-------------------------------------------------------------------------------------------------------------------------------------------------------------------------------------------------------------|---------------|-------------|-------------------------------------------------------------------------------------------------------------------------------------------------------------------------------------------------------------------------------------------------------------------------------------------------------------------------------------------------------------------------|-----------|
| 27 | Verily       | 193 | Regional Health in South Dakota | R&D Collaboration | To identify and develop solutions to significant challenges in clinical research, including making research more accessible and engaging for patients, clinicians, researchers and research sponsors alike. | 2019          |             | <a href="https://kstatic.googleusercontent.com/files/74ff9109b3alc60801d44250fd34fbbfafcdad4be13125f6a8d63fc385a3475e5e3538e93fa63a4e29b0011c16e39e720f7ab19ae2f9f5e19dde0992371a8b9">https://kstatic.googleusercontent.com/files/74ff9109b3alc60801d44250fd34fbbfafcdad4be13125f6a8d63fc385a3475e5e3538e93fa63a4e29b0011c16e39e720f7ab19ae2f9f5e19dde0992371a8b9</a>   | 2020/8/17 |
| 27 | Verily       | 194 | University of Pittsburgh        | R&D Collaboration | To identify and develop solutions to significant challenges in clinical research, including making research more accessible and engaging for patients, clinicians, researchers and research sponsors alike. | 2019          |             | <a href="https://kstatic.googleusercontent.com/files/74ff9109b3alc60801d44250fd34fbbfafcdad4be13125f6a8d63fc385a3475e5e3538e93fa63a4e29b0011c16e39e720f7ab19ae2f9f5e19dde0992371a8b9">https://kstatic.googleusercontent.com/files/74ff9109b3alc60801d44250fd34fbbfafcdad4be13125f6a8d63fc385a3475e5e3538e93fa63a4e29b0011c16e39e720f7ab19ae2f9f5e19dde0992371a8b9</a>   | 2020/8/17 |
| 27 | Verily       | 195 | Walgreens Boots Alliance        | Expansion         | To collaborate on multiple projects under a broad agreement aimed at improving health outcomes for patients with chronic conditions, while also lowering the cost of care.                                  | 2018          |             | <a href="https://kstatic.googleusercontent.com/files/84422b7e1086ab03e50ab30b4de3798900b55af8e6a689a1f1c15ffe3c7fa4956ee985dcfee6f2be31c86d145a80abcaced6da7dabd932c5f70dc32cb7049f12">https://kstatic.googleusercontent.com/files/84422b7e1086ab03e50ab30b4de3798900b55af8e6a689a1f1c15ffe3c7fa4956ee985dcfee6f2be31c86d145a80abcaced6da7dabd932c5f70dc32cb7049f12</a> | 2020/8/17 |

| #  | Company name | #   | Partner company name | Contract style       | Purpose of contract                                                                                                                                                                                                                                                                    | Year of start | Year of end | Link of press release                                                                                                                                                                                                                                                                                                                                                     | Accessed  |
|----|--------------|-----|----------------------|----------------------|----------------------------------------------------------------------------------------------------------------------------------------------------------------------------------------------------------------------------------------------------------------------------------------|---------------|-------------|---------------------------------------------------------------------------------------------------------------------------------------------------------------------------------------------------------------------------------------------------------------------------------------------------------------------------------------------------------------------------|-----------|
| 27 | Verily       | 196 | ResMed               | M&A                  | To study the health and financial impacts of undiagnosed and untreated sleep apnea, and develop software solutions that enable healthcare providers to more efficiently identify, diagnose, treat and manage individuals with sleep apnea and other breathing related sleep disorders. | 2018          |             | <a href="https://kstatic.googleusercontent.com/files/d86634db2c307d3ac3a6b4a98a8bc04e241c6e66fc0a1fc01399a504c102cff27baacff1f7b2019be59a097eddf5439edc1c546bac311c6415a077d3da255087d">https://kstatic.googleusercontent.com/files/d86634db2c307d3ac3a6b4a98a8bc04e241c6e66fc0a1fc01399a504c102cff27baacff1f7b2019be59a097eddf5439edc1c546bac311c6415a077d3da255087d</a> | 2020/8/17 |
| 27 | Verily       | 76  | Sanofi               | M&A                  | To help people with diabetes live full, healthy lives by developing comprehensive solutions that combine devices, software, medicine, and professional care to enable simple and intelligent disease management.                                                                       | 2016          |             | <a href="https://kstatic.googleusercontent.com/files/15bd2f060cabc2b5f78d82898d80d11bc6d78c3356b81f60aef02678c1d53ad8d97ec8396075285d29973b3253945709a0ab0a29f92146308a02a4c950f9b982">https://kstatic.googleusercontent.com/files/15bd2f060cabc2b5f78d82898d80d11bc6d78c3356b81f60aef02678c1d53ad8d97ec8396075285d29973b3253945709a0ab0a29f92146308a02a4c950f9b982</a>   | 2020/8/17 |
| 29 | Welldoc      | 25  | Samsung              | Commercial agreement | To integrate WellDoc' s newly-released consumer diabetes health app, BlueStar® C, with the recently launched Samsung Health, a mobile one-stop shop for health and fitness, and with Samsung Gear, including smart watches and fitness trackers.                                       | 2017          |             | <a href="https://www.welldoc.com/news/welldoc-enters-joint-commercial-partnership-agreement-with-samsung-for-bluestar-c-new-consumer-focused-diabetes-health-application/">https://www.welldoc.com/news/welldoc-enters-joint-commercial-partnership-agreement-with-samsung-for-bluestar-c-new-consumer-focused-diabetes-health-application/</a>                           | 2020/8/17 |

| #  | Company name | #   | Partner company name | Contract style    | Purpose of contract                                                                                                                                                                                                                                                                                                                               | Year of start | Year of end | Link of press release                                                                                                                                                                                                         | Accessed  |
|----|--------------|-----|----------------------|-------------------|---------------------------------------------------------------------------------------------------------------------------------------------------------------------------------------------------------------------------------------------------------------------------------------------------------------------------------------------------|---------------|-------------|-------------------------------------------------------------------------------------------------------------------------------------------------------------------------------------------------------------------------------|-----------|
| 29 | Welldoc      | 197 | Astellas             | R&D Collaboration | To collaborate to broaden the adoption of BlueStar® in the U.S. market, and jointly develop and commercialize digital therapeutics in other therapeutic areas globally.                                                                                                                                                                           | 2019          |             | <a href="https://www.welldoc.com/news/astellas-and-welldoc-enter-into-strategic-alliance/">https://www.welldoc.com/news/astellas-and-welldoc-enter-into-strategic-alliance/</a>                                               | 2020/8/17 |
| 29 | Welldoc      | 83  | Voluntis             | R&D Collaboration | To aim at combining Voluntis' insulin titration technology with WellDoc's extensive digital coaching platform to create a holistic digital diabetes management solution for patients, providers, health systems and health plans.                                                                                                                 | 2018          |             | <a href="https://www.welldoc.com/news/diabetes-digital-therapeutic-offerings-voluntis-welldoc/">https://www.welldoc.com/news/diabetes-digital-therapeutic-offerings-voluntis-welldoc/</a>                                     | 2020/8/17 |
| 29 | Welldoc      | 198 | Mass General Brigham | Expansion         | After conducting a 2-year program of Quality Improvement (QI) research with the Ambulatory Practice of the Future (APF) at Massachusetts General Hospital (MGH), BlueStar®, Welldoc's digital health solution for people living with diabetes, will now be integrated within the electronic health record to evaluate its effectiveness at scale. | 2020          |             | <a href="https://www.welldoc.com/news/welldoc-commercial-agreement-mass-general-brigham-digital-health-solution/">https://www.welldoc.com/news/welldoc-commercial-agreement-mass-general-brigham-digital-health-solution/</a> | 2020/8/17 |

| #  | Company name | #   | Partner company name              | Contract style | Purpose of contract                                                                                                                                                                     | Year of start | Year of end | Link of press release                                                                                                                                                                                                                                                       | Accessed  |
|----|--------------|-----|-----------------------------------|----------------|-----------------------------------------------------------------------------------------------------------------------------------------------------------------------------------------|---------------|-------------|-----------------------------------------------------------------------------------------------------------------------------------------------------------------------------------------------------------------------------------------------------------------------------|-----------|
| 29 | Welldoc      | 199 | Competitive Health                | Expansion      | To offer Competitive Health' s clients BlueStar, Welldoc' s digital assistant for individuals living with type 2 diabetes.                                                              | 2019          |             | <a href="https://www.welldoc.com/news/competitive-health-partners/">https://www.welldoc.com/news/competitive-health-partners/</a>                                                                                                                                           | 2020/8/17 |
| 29 | Welldoc      | 200 | Redox                             | Expansion      | To allow providers to receive and review insights about users of the BlueStar® digital health app for diabetes management directly within their EHR at the point of care.               | 2020          |             | <a href="https://www.welldoc.com/news/welldoc-and-redox-partner/">https://www.welldoc.com/news/welldoc-and-redox-partner/</a>                                                                                                                                               | 2020/8/17 |
| 29 | Welldoc      | 201 | Business Health Care Group (BHCG) | Expansion      | To deliver precision-based real-time feedback, diabetes educational tools, and provides actionable insights to the user' s care team to optimize care.                                  | 2019          |             | <a href="https://www.welldoc.com/news/business-health-care-group-welldoc-partnership/">https://www.welldoc.com/news/business-health-care-group-welldoc-partnership/</a>                                                                                                     | 2020/8/17 |
| 29 | Welldoc      | 40  | Validic                           | Expansion      | To allow BlueStar users to connect their wearables, apps, and in-home health devices directly to the platform - enabling deeper engagement and better self-management of one' s health. | 2019          |             | <a href="https://www.welldoc.com/news/validic-and-welldoc-partner-to-enhance-engagement-for-individuals-living-with-chronic-conditions/">https://www.welldoc.com/news/validic-and-welldoc-partner-to-enhance-engagement-for-individuals-living-with-chronic-conditions/</a> | 2020/8/17 |
| 29 | Welldoc      | 162 | Solera Health                     | Expansion      | To improve the lives of those living with chronic diseases while enhancing clinical                                                                                                     | 2018          |             | <a href="https://www.welldoc.com/news/sole-ra-health-welldoc-partners-offer-health-plans-employers/">https://www.welldoc.com/news/sole-ra-health-welldoc-partners-offer-health-plans-employers/</a>                                                                         | 2020/8/17 |

| #  | Company name | #   | Partner company name | Contract style    | Purpose of contract                                                                                                                                                     | Year of start | Year of end | Link of press release                                                                                                                                                                                                                                                                                                                             | Accessed  |
|----|--------------|-----|----------------------|-------------------|-------------------------------------------------------------------------------------------------------------------------------------------------------------------------|---------------|-------------|---------------------------------------------------------------------------------------------------------------------------------------------------------------------------------------------------------------------------------------------------------------------------------------------------------------------------------------------------|-----------|
| 29 | WellDoc      | 202 | Human API            | Expansion         | To provide WellDoc with real-time access to comprehensive clinical patient data from its network of 15,000+ pharmacies, health systems and laboratories.                | 2016          |             | <a href="https://www.welldoc.com/news/welldoc-announces-partnership-with-human-api-to-explore-enhanced-data-integration-capabilities-for-its-bluestar-digital-therapeutic/">https://www.welldoc.com/news/welldoc-announces-partnership-with-human-api-to-explore-enhanced-data-integration-capabilities-for-its-bluestar-digital-therapeutic/</a> | 2020/8/17 |
| 37 | Glooko       | 76  | Sanofi               | Expansion         | To provide people with diabetes with a digital health solution* to help manage their disease under the virtual guidance of their care teams.                            | 2020          |             | <a href="https://www.glooko.com/press-release/glooko-sanofi-collaboration/">https://www.glooko.com/press-release/glooko-sanofi-collaboration/</a>                                                                                                                                                                                                 | 2020/8/17 |
| 37 | Glooko       | 101 | Companion Medical    | R&D Collaboration | To allow users to automatically integrate their insulin data with the Glooko diabetes data management system for clinical evaluation by their healthcare professionals. | 2019          |             | <a href="https://www.glooko.com/press-release/companion-medical-and-glooko-announce-partnership-agreement-to-integrate-insulin-data-for-multiple-daily-injections/">https://www.glooko.com/press-release/companion-medical-and-glooko-announce-partnership-agreement-to-integrate-insulin-data-for-multiple-daily-injections/</a>                 | 2020/8/17 |
| 37 | Glooko       | 203 | type 1 diabetes      | Expansion         | The agreement will result in one of the richest patient data sets to study T1D and drive advances in treatment and care.                                                | 2019          |             | <a href="https://www.glooko.com/press-release/t1d-exchange-names-glooko-as-data-management-partner-in-quality-improvement-collaborative/">https://www.glooko.com/press-release/t1d-exchange-names-glooko-as-data-management-partner-in-quality-improvement-collaborative/</a>                                                                     | 2020/8/18 |

| #  | Company name | #   | Partner company name | Contract style    | Purpose of contract                                                                                                                                                                         | Year of start | Year of end | Link of press release                                                                                                                                                                                                                                                                                                   | Accessed  |
|----|--------------|-----|----------------------|-------------------|---------------------------------------------------------------------------------------------------------------------------------------------------------------------------------------------|---------------|-------------|-------------------------------------------------------------------------------------------------------------------------------------------------------------------------------------------------------------------------------------------------------------------------------------------------------------------------|-----------|
| 37 | Glooko       | 6   | Dexcom Inc.          | R&D Collaboration | To empowers people with diabetes and their care teams to optimize diabetes support by enabling passively collected, on-demand access to CGM data through the widely used Glooko platform.   | 2017          |             | <a href="https://www.glooko.com/press-release/glooko-dexcom-expand-relationship-global-cloud-sharing-data-agreement/">https://www.glooko.com/press-release/glooko-dexcom-expand-relationship-global-cloud-sharing-data-agreement/</a>                                                                                   | 2020/8/18 |
| 37 | Glooko       | 41  | Cecelia Health       | R&D Collaboration | Combining Fit4D' s clinically expert coaches with Glooko' s device agnostic technology platform creates one of the marketplace' s most scaleable, integrated diabetes management offerings. | 2017          | 2019        | <a href="https://www.glooko.com/press-release/fit4d-glooko-diabetes-management/">https://www.glooko.com/press-release/fit4d-glooko-diabetes-management/</a>                                                                                                                                                             | 2020/8/18 |
| 37 | Glooko       | 205 | AMC Health           | R&D Collaboration | To help clinicians and patients improve diabetes outcomes at lower costs.                                                                                                                   | 2016          |             | <a href="https://www.glooko.com/press-release/amc-health-and-glooko-partner-to-deliver-diabetes-population-management-services-and-improve-diabetes-outcomes/">https://www.glooko.com/press-release/amc-health-and-glooko-partner-to-deliver-diabetes-population-management-services-and-improve-diabetes-outcomes/</a> | 2020/8/18 |
| 37 | Glooko       | 46  | DreaMed Diabetes     | R&D Collaboration | A partnership to commercialize DreaMed' s Advisor algorithm using the Glooko platform.                                                                                                      | 2016          |             | <a href="https://www.glooko.com/press-release/glooko-dreamed-diabetes-partner-deliver-unprecedented-type-1-diabetes-decision-support/">https://www.glooko.com/press-release/glooko-dreamed-diabetes-partner-deliver-unprecedented-type-1-diabetes-decision-support/</a>                                                 | 2020/8/18 |

| #  | Company name | #   | Partner company name | Contract style    | Purpose of contract                                                                                                                                                                                                          | Year of start | Year of end | Link of press release                                                                                                                                                                                                                                                       | Accessed  |
|----|--------------|-----|----------------------|-------------------|------------------------------------------------------------------------------------------------------------------------------------------------------------------------------------------------------------------------------|---------------|-------------|-----------------------------------------------------------------------------------------------------------------------------------------------------------------------------------------------------------------------------------------------------------------------------|-----------|
| 37 | Glooko       | 2   | Hoffmann-La Roche    | R&D Collaboration | Glooko addresses a long-standing deterrent to tracking blood glucose trends: manual entry and syncing of blood glucose data into apps and disease management systems to help patients and clinicians better manage diabetes. | 2015          |             | <a href="https://www.glooko.com/press-release/glooko-announces-integration-with-the-roche-accu-chek-aviva-connect-blood-glucose-meters/">https://www.glooko.com/press-release/glooko-announces-integration-with-the-roche-accu-chek-aviva-connect-blood-glucose-meters/</a> | 2020/8/18 |
| 37 | Glooko       | 2   | Hoffmann-La Roche    | R&D Collaboration | To provide ACCU-CHEK meter users an easy solution to download their meter readings directly into their Apple iPhone® or iPod touch.                                                                                          | 2012          |             | <a href="https://www.glooko.com/press-release/glooko-launches-the-glooko-ir-adapter-for-accu-chek/">https://www.glooko.com/press-release/glooko-launches-the-glooko-ir-adapter-for-accu-chek/</a>                                                                           | 2020/8/18 |
| 39 | Google       | 186 | Novartis             | R&D Collaboration | To develop and commercialize Google's "smart lens" technology with the potential to transform eye care and further enhance Alcon's pipeline and global leadership in contact lenses and intraocular lenses.                  | 2014          |             | <a href="https://www.novartis.cz/cs/node/10456">https://www.novartis.cz/cs/node/10456</a>                                                                                                                                                                                   | 2020/8/18 |

| #  | Company name   | #   | Partner company name                   | Contract style    | Purpose of contract                                                                                                                                                                                                                                                                                                                              | Year of start | Year of end | Link of press release                                                                                                                                                                                                                                                                                                                                                                                                         | Accessed  |
|----|----------------|-----|----------------------------------------|-------------------|--------------------------------------------------------------------------------------------------------------------------------------------------------------------------------------------------------------------------------------------------------------------------------------------------------------------------------------------------|---------------|-------------|-------------------------------------------------------------------------------------------------------------------------------------------------------------------------------------------------------------------------------------------------------------------------------------------------------------------------------------------------------------------------------------------------------------------------------|-----------|
| 39 | Google         | 76  | Sanofi                                 | R&D Collaboration | To improve diabetes care by developing new tools that bring together many of the previously siloed pieces of diabetes management and enable new kinds of interventions.                                                                                                                                                                          | 2015          |             | <a href="https://www.sanofi.com/en/media-room/press-releases/2015/2015-08-31-15-06-00">https://www.sanofi.com/en/media-room/press-releases/2015/2015-08-31-15-06-00</a>                                                                                                                                                                                                                                                       | 2020/8/18 |
| 41 | Cecelia Health | 206 | Valeritas                              | Expansion         | To leverages its proprietary diabetes care management technology platform to enable CDEs to provide one-on-one coaching support that help patients understand the benefits of V-Go and how to use V-Go following their first prescription and support them to efficiently manage their diabetes through continued use of the V-Go as prescribed. | 2019          |             | <a href="https://www.prweb.com/releases/cecelia_health_partners_with_valeritas_to_support_success_of_innovative_v_go_wearable_insulin_delivery_device_designed_for_people_living_with_diabetes/prweb16031906.htm">https://www.prweb.com/releases/cecelia_health_partners_with_valeritas_to_support_success_of_innovative_v_go_wearable_insulin_delivery_device_designed_for_people_living_with_diabetes/prweb16031906.htm</a> | 2020/8/18 |
| 41 | Cecelia Health | 207 | Jaeb Center for Health Research (JCHR) | R&D Collaboration | To demonstrate scaled initiation, persistency and data-driven guidance for patients using a continuous glucose monitor (CGM) device such as the Dexcom G6 or the Abbott Freestyle Libre.                                                                                                                                                         | 2019          |             | <a href="https://www.prweb.com/releases/cecelia_health_partners_with_jchr_and_the_helmsley_trust_to_transform_the_lives_and_health_outcomes_of_people_living_with_diabetes/prweb16013424.htm">https://www.prweb.com/releases/cecelia_health_partners_with_jchr_and_the_helmsley_trust_to_transform_the_lives_and_health_outcomes_of_people_living_with_diabetes/prweb16013424.htm</a>                                         | 2020/8/18 |

| #  | Company name   | #   | Partner company name          | Contract style      | Purpose of contract                                                                                                                                                                                                                                                                              | Year of start | Year of end | Link of press release                                                                                                                                                                                                                                                                               | Accessed  |
|----|----------------|-----|-------------------------------|---------------------|--------------------------------------------------------------------------------------------------------------------------------------------------------------------------------------------------------------------------------------------------------------------------------------------------|---------------|-------------|-----------------------------------------------------------------------------------------------------------------------------------------------------------------------------------------------------------------------------------------------------------------------------------------------------|-----------|
| 41 | Cecelia Health | 161 | WellCare Health Plans         | Expansion           | To deliver Fit4D' s personalized coaching program to WellCare members living with Type 2 diabetes in the state of New York.                                                                                                                                                                      | 2018          |             | <a href="https://www.prweb.com/releases/fit4d_and_wellcare_partner_to_deliver_diabetes_management_solution_to_members_in_new_york/prweb15938155.htm">https://www.prweb.com/releases/fit4d_and_wellcare_partner_to_deliver_diabetes_management_solution_to_members_in_new_york/prweb15938155.htm</a> | 2020/8/18 |
| 41 | Cecelia Health | 208 | Humana                        | Expansion           | To make the Broward community 20% healthier by 2020, and will now serve more diabetes members in Florida.                                                                                                                                                                                        | 2018          |             | <a href="http://www.prweb.com/releases/2018/03/prweb15279467.htm">http://www.prweb.com/releases/2018/03/prweb15279467.htm</a>                                                                                                                                                                       | 2020/8/18 |
| 41 | Cecelia Health | 209 | Bronx-Lebanon Hospital Center | Expansion           | To provide both organizations with the opportunity to offer personalized coaching to diabetes patients in managing this disease. Bronx-Lebanon' s Department of Family Medicine will be spearheading the initiative.                                                                             | 2017          |             | <a href="http://www.prweb.com/releases/2017/11/prweb14958090.htm">http://www.prweb.com/releases/2017/11/prweb14958090.htm</a>                                                                                                                                                                       | 2020/8/18 |
| 41 | Cecelia Health | 210 | Robin Hood Foundation         | Financial agreement | The Robin Hood grant will help us target immigrant and Latino patients with diabetes by providing them increased access to treatment, when necessary, from our expert team of Family Medicine Practitioners, with the added and most important benefit of ongoing support from the Fit4D coaches | 2017          |             | <a href="http://www.prweb.com/releases/2017/11/prweb14958090.htm">http://www.prweb.com/releases/2017/11/prweb14958090.htm</a>                                                                                                                                                                       | 2020/8/18 |

| #  | Company name | #   | Partner company name | Contract style      | Purpose of contract                                                                                                                                                                                               | Year of start | Year of end | Link of press release                                                                                                                                                                                                                                                                                                                                         | Accessed  |
|----|--------------|-----|----------------------|---------------------|-------------------------------------------------------------------------------------------------------------------------------------------------------------------------------------------------------------------|---------------|-------------|---------------------------------------------------------------------------------------------------------------------------------------------------------------------------------------------------------------------------------------------------------------------------------------------------------------------------------------------------------------|-----------|
| 42 | Noom         | 211 | EVERSANA             | R&D Collaboration   | To increase medication adherence and improve health outcomes for the millions of patients suffering from chronic conditions and rare diseases worldwide.                                                          | 2020          |             | <a href="https://web.noom.com/press-releases/2020/01/eversana-and-noom-announce-strategic-partnership-to-improve-therapy-adherence-and-patient-engagement-for-complex-therapies/">https://web.noom.com/press-releases/2020/01/eversana-and-noom-announce-strategic-partnership-to-improve-therapy-adherence-and-patient-engagement-for-complex-therapies/</a> | 2020/8/18 |
| 42 | Noom         | 212 | Serena Ventures      | Financial agreement | To receive an investment from Serena Ventures to help fund the company's continued growth. In addition to capital, Noom will have access to the firm's expansive network and growing list of portfolio companies. | 2019          |             | <a href="https://web.noom.com/press-releases/2019/09/noom-announces-investment-from-serena-ventures/">https://web.noom.com/press-releases/2019/09/noom-announces-investment-from-serena-ventures/</a>                                                                                                                                                         | 2020/8/18 |
| 42 | Noom         | 213 | Samsung Ventures     | Financial agreement | Samsung Ventures Invests in Noom, Inc. to Change Behaviors That Cause the Most Pressing Chronic Conditions                                                                                                        | 2016          |             | <a href="https://web.noom.com/press-releases/2016/12/samsung-ventures-invests-noom-inc-change-behaviors-cause-pressing-chronic-conditions/">https://web.noom.com/press-releases/2016/12/samsung-ventures-invests-noom-inc-change-behaviors-cause-pressing-chronic-conditions/</a>                                                                             | 2020/8/18 |

| #  | Company name | #   | Partner company name                   | Contract style    | Purpose of contract                                                                                                                                                                                                                                                                                 | Year of start | Year of end | Link of press release                                                                                                                                                                                                                                                                                                         | Accessed  |
|----|--------------|-----|----------------------------------------|-------------------|-----------------------------------------------------------------------------------------------------------------------------------------------------------------------------------------------------------------------------------------------------------------------------------------------------|---------------|-------------|-------------------------------------------------------------------------------------------------------------------------------------------------------------------------------------------------------------------------------------------------------------------------------------------------------------------------------|-----------|
| 42 | Noom         | 214 | Jamaica Hospital Medical Center (JHMC) | Expansion         | Noom is selected for its virtual National Diabetes Prevention Program (NDPP) platform. This pilot program will provide a user-centric, mobile coaching experience to engage and empower individuals in New York to achieve their health goals and effortlessly monitor their progress in real time. | 2016          |             | <a href="https://web.noom.com/press-releases/2016/06/jamaica-hospital-medical-center-deploys-noom-platform-engage-66000-new-yorkers-diabetes-prevention-program/">https://web.noom.com/press-releases/2016/06/jamaica-hospital-medical-center-deploys-noom-platform-engage-66000-new-yorkers-diabetes-prevention-program/</a> | 2020/8/18 |
| 42 | Noom         | 215 | CityMD                                 | R&D Collaboration | Focused on preventing diabetes, Noom will team up with CityMD to offer pre-diabetic individuals the proper tools to inhibit this terrible disease.                                                                                                                                                  | 2015          |             | <a href="https://web.noom.com/press-releases/2015/05/test-2/">https://web.noom.com/press-releases/2015/05/test-2/</a>                                                                                                                                                                                                         | 2020/8/18 |
| 42 | Noom         | 216 | CareConnectors                         | R&D Collaboration | To enable the company's healthcare focused coaching platform, Noom Health, to exchange data with leading electronic medical record systems (EMRs).                                                                                                                                                  | 2015          |             | <a href="https://web.noom.com/press-releases/2015/04/noom-inc-joins/">https://web.noom.com/press-releases/2015/04/noom-inc-joins/</a>                                                                                                                                                                                         | 2020/8/18 |

| #  | Company name | #   | Partner company name       | Contract style      | Purpose of contract                                                                                                                                                                                                                                                                                                                  | Year of start | Year of end | Link of press release                                                                                                                                                                                                                                                                   | Accessed  |
|----|--------------|-----|----------------------------|---------------------|--------------------------------------------------------------------------------------------------------------------------------------------------------------------------------------------------------------------------------------------------------------------------------------------------------------------------------------|---------------|-------------|-----------------------------------------------------------------------------------------------------------------------------------------------------------------------------------------------------------------------------------------------------------------------------------------|-----------|
| 43 | Omada Health | 217 | Physera                    | M&A                 | Omada adds Physera's musculoskeletal solution to its suite of digital care programs for the prevention and self-management of diabetes, hypertension, and mental health.                                                                                                                                                             | 2020          |             | <a href="https://www.omadahealth.com/press-release-omada-health-acquires-physera">https://www.omadahealth.com/press-release-omada-health-acquires-physera</a>                                                                                                                           | 2020/8/18 |
| 43 | Omada Health | 70  | Blue Cross and Blue Shield | Expansion           | The availability of Omada's Type 2 Diabetes Digital Care program as a covered benefit for the insurer's commercial plans. Building on the two organizations' success deploying digital diabetes prevention in the state, Omada's type 2 diabetes program will be available for Minnesota employers to launch beginning January 2020. | 2019          |             | <a href="https://www.omadahealth.com/press-release-blue-cross-and-blue-shield-of-minnesota-launches-omadas-type-2-diabetes-management-program">https://www.omadahealth.com/press-release-blue-cross-and-blue-shield-of-minnesota-launches-omadas-type-2-diabetes-management-program</a> | 2020/8/18 |
| 43 | Omada Health | 70  | Blue Cross and Blue Shield | Financial agreement | Blue Cross also announced a strategic investment in Omada Health through the insurer's parent company.                                                                                                                                                                                                                               | 2019          |             | <a href="https://www.omadahealth.com/press-release-blue-cross-and-blue-shield-of-minnesota-launches-omadas-type-2-diabetes-management-program">https://www.omadahealth.com/press-release-blue-cross-and-blue-shield-of-minnesota-launches-omadas-type-2-diabetes-management-program</a> | 2020/8/18 |

| #  | Company name | #   | Partner company name       | Contract style      | Purpose of contract                                                                                                                                                                                                                                                                   | Year of start | Year of end | Link of press release                                                                                                                                                                                                                                                                                                                                                     | Accessed  |
|----|--------------|-----|----------------------------|---------------------|---------------------------------------------------------------------------------------------------------------------------------------------------------------------------------------------------------------------------------------------------------------------------------------|---------------|-------------|---------------------------------------------------------------------------------------------------------------------------------------------------------------------------------------------------------------------------------------------------------------------------------------------------------------------------------------------------------------------------|-----------|
| 43 | Omada Health | 218 | Intermountain Ventures     | Financial agreement | Omada Health today announced an investment from Intermountain Ventures, the strategic investment arm of Intermountain Healthcare.                                                                                                                                                     | 2019          |             | <a href="https://www.omadahealth.com/press-release-intermountain-ventures-invests-in-omada-health">https://www.omadahealth.com/press-release-intermountain-ventures-invests-in-omada-health</a>                                                                                                                                                                           | 2020/8/18 |
| 43 | Omada Health | 70  | Blue Cross and Blue Shield | Expansion           | Blue Cross will partner with Livongo and Omada Health, two digital health leaders, on programs designed to help prevent diabetes for those at risk and better manage diabetes for those living with the disease.                                                                      | 2018          |             | <a href="https://www.mibluesperspectives.com/news/blue-cross-blue-shield-of-michigan-offers-diabetes-prevention-management-with-new-digital-solutions-for-self-funded-group-customers/">https://www.mibluesperspectives.com/news/blue-cross-blue-shield-of-michigan-offers-diabetes-prevention-management-with-new-digital-solutions-for-self-funded-group-customers/</a> | 2020/8/18 |
| 43 | Omada Health | 219 | Cigna                      | Expansion           | The new program is designed to deliver an expanded suite of personalized, user-friendly digital health tools to help people prevent the onset of diabetes and other chronic diseases, and will be available to Cigna's national and regional employer clients effective January 2019. | 2018          |             | <a href="https://www.omadahealth.com/press-release-cigna-expands-personalized-diabetes-prevention-program-in-collaboration-with-omada-health">https://www.omadahealth.com/press-release-cigna-expands-personalized-diabetes-prevention-program-in-collaboration-with-omada-health</a>                                                                                     | 2020/8/18 |

| #  | Company name | #   | Partner company name               | Contract style | Purpose of contract                                                                                                                                                                                                              | Year of start | Year of end | Link of press release                                                                                                                                                                                                                                               | Accessed  |
|----|--------------|-----|------------------------------------|----------------|----------------------------------------------------------------------------------------------------------------------------------------------------------------------------------------------------------------------------------|---------------|-------------|---------------------------------------------------------------------------------------------------------------------------------------------------------------------------------------------------------------------------------------------------------------------|-----------|
| 43 | Omada Health | 219 | Cigna                              | Expansion      | Through its commercial partnership with Omada Health, Cigna offers clinically-eligible customers no-cost access to the country's leading digital Diabetes Prevention Program (DPP).                                              | 2017          |             | <a href="https://www.omadahealth.com/press/cigna-omada-health-team-to-deliver-diabetes-prevention-to-city-of-phoenix-employees">https://www.omadahealth.com/press/cigna-omada-health-team-to-deliver-diabetes-prevention-to-city-of-phoenix-employees</a>           | 2020/8/18 |
| 43 | Omada Health | 218 | Intermountain Ventures             | Expansion      | To create a roadmap for large health care organizations across the country to adopt proven online behavior change interventions for at-risk patients, and integrate those programs into provider referral and clinical workflow. | 2016          |             | <a href="https://www.omadahealth.com/press/ama-omada-health-intermountain-healthcare-partner-to-reduce-incidence-of-type-2-diabetes">https://www.omadahealth.com/press/ama-omada-health-intermountain-healthcare-partner-to-reduce-incidence-of-type-2-diabetes</a> | 2020/8/18 |
| 43 | Omada Health | 220 | American Medical Association (AMA) | Expansion      | To create a roadmap for large health care organizations across the country to adopt proven online behavior change interventions for at-risk patients, and integrate those programs into provider referral and clinical workflow. | 2016          |             | <a href="https://www.omadahealth.com/press/ama-omada-health-intermountain-healthcare-partner-to-reduce-incidence-of-type-2-diabetes">https://www.omadahealth.com/press/ama-omada-health-intermountain-healthcare-partner-to-reduce-incidence-of-type-2-diabetes</a> | 2020/8/18 |

| #  | Company name | #   | Partner company name | Contract style      | Purpose of contract                                                                                                                                                                                                                                 | Year of start | Year of end | Link of press release                                                                                                                                                                                                                                                             | Accessed  |
|----|--------------|-----|----------------------|---------------------|-----------------------------------------------------------------------------------------------------------------------------------------------------------------------------------------------------------------------------------------------------|---------------|-------------|-----------------------------------------------------------------------------------------------------------------------------------------------------------------------------------------------------------------------------------------------------------------------------------|-----------|
| 43 | Omada Health | 208 | Humana               | Expansion           | Using Omada' s digitally-based Prevent program, and Humana' s decades of experience serving Medicare Advantage members, a cohort of 491 Humana Medicare Advantage beneficiaries achieved clinically-meaningful engagement and weight loss outcomes. | 2015          |             | <a href="https://www.omadahealth.com/press/omada-health-and-humana-partner-to-reduce-diabetes-risk-in-people-with-medicare">https://www.omadahealth.com/press/omada-health-and-humana-partner-to-reduce-diabetes-risk-in-people-with-medicare</a>                                 | 2020/8/18 |
| 44 | Vida Health  | 221 | GuideWell            | Financial agreement | To be able to leverage the expertise of our new partners to build on the skills of the Vida team and ensure we realize our full potential.                                                                                                          | 2019          |             | <a href="https://blog.vida.com/blog/2019/7/1/vida-health-is-proud-to-announce-new-partnerships-with-guidewell-teladoc-health-and-workday-1">https://blog.vida.com/blog/2019/7/1/vida-health-is-proud-to-announce-new-partnerships-with-guidewell-teladoc-health-and-workday-1</a> | 2020/8/18 |
| 44 | Vida Health  | 222 | Workday              | Financial agreement | To be able to leverage the expertise of our new partners to build on the skills of the Vida team and ensure we realize our full potential.                                                                                                          | 2019          |             | <a href="https://blog.vida.com/blog/2019/7/1/vida-health-is-proud-to-announce-new-partnerships-with-guidewell-teladoc-health-and-workday-1">https://blog.vida.com/blog/2019/7/1/vida-health-is-proud-to-announce-new-partnerships-with-guidewell-teladoc-health-and-workday-1</a> | 2020/8/18 |
| 44 | Vida Health  | 137 | Teladoc              | Financial agreement | To be able to leverage the expertise of our new partners to build on the skills of the Vida team and ensure we realize our full potential.                                                                                                          | 2019          |             | <a href="https://blog.vida.com/blog/2019/7/1/vida-health-is-proud-to-announce-new-partnerships-with-guidewell-teladoc-health-and-workday-1">https://blog.vida.com/blog/2019/7/1/vida-health-is-proud-to-announce-new-partnerships-with-guidewell-teladoc-health-and-workday-1</a> | 2020/8/18 |

| #  | Company name     | #   | Partner company name      | Contract style    | Purpose of contract                                                                                                                                                                                               | Year of start | Year of end | Link of press release                                                                                                                                                                                                                                                                             | Accessed  |
|----|------------------|-----|---------------------------|-------------------|-------------------------------------------------------------------------------------------------------------------------------------------------------------------------------------------------------------------|---------------|-------------|---------------------------------------------------------------------------------------------------------------------------------------------------------------------------------------------------------------------------------------------------------------------------------------------------|-----------|
| 45 | Sweetch          | 223 | WellSpan                  | Expansion         | To provide Sweetch's mobile health app to WellSpan Health's 15,000 employees, including 200 primary care and specialty physicians and advanced practice clinicians in central Pennsylvania and northern Maryland. | 2018          |             | <a href="https://www.prnewswire.com/news-releases/ai-mobile-health-app-sweetch-partners-with-wellspan-health-to-help-fight-diabetes-300741126.html">https://www.prnewswire.com/news-releases/ai-mobile-health-app-sweetch-partners-with-wellspan-health-to-help-fight-diabetes-300741126.html</a> | 2020/8/18 |
| 46 | DreaMed Diabetes | 3   | Medtronic                 | R&D Collaboration | Medtronic will integrate DreaMed's program in its diabetes products, and will pay DreaMed royalties for each such product sold.                                                                                   | 2015          |             | <a href="https://www.endocrineweb.com/professional/type-1-diabetes/dreamed-diabetes-medtronic-enter-partnership-artificial-pancreas-techno">https://www.endocrineweb.com/professional/type-1-diabetes/dreamed-diabetes-medtronic-enter-partnership-artificial-pancreas-techno</a>                 | 2020/8/18 |
| 55 | Rimidi           | 224 | Point-of-Care Diagnostics | R&D Collaboration | To seek to close gaps in care, drive clinical efficiency and improve patient outcomes with Connected Care, a digital condition management solution powered by Rimidi's software.                                  | 2018          |             | <a href="https://rimidi.com/news/rimidi-partners-with-a-point-of-care-diagnostics-company">https://rimidi.com/news/rimidi-partners-with-a-point-of-care-diagnostics-company</a>                                                                                                                   | 2020/8/18 |
| 55 | Rimidi           | 6   | Dexcom Inc.               | R&D Collaboration | To enable a rich ecosystem of novel solutions and put the user in control of where and how they interact with their glucose data.                                                                                 | 2018          |             | <a href="https://rimidi.com/news/rimidi-partners-with-dexcom-for-the-launch-of-their-data-platform">https://rimidi.com/news/rimidi-partners-with-dexcom-for-the-launch-of-their-data-platform</a>                                                                                                 | 2020/8/18 |

| #  | Company name      | #   | Partner company name  | Contract style       | Purpose of contract                                                                                                                                                                                                         | Year of start | Year of end | Link of press release                                                                                                                                                                                                                                                                                     | Accessed  |
|----|-------------------|-----|-----------------------|----------------------|-----------------------------------------------------------------------------------------------------------------------------------------------------------------------------------------------------------------------------|---------------|-------------|-----------------------------------------------------------------------------------------------------------------------------------------------------------------------------------------------------------------------------------------------------------------------------------------------------------|-----------|
| 55 | Rimidi            | 107 | Eli Lilly             | R&D<br>Collaboration | To develop provider-focused tools that will integrate personalized solutions for people who use insulin to manage their diabetes, the companies announced today.                                                            | 2017          |             | <a href="https://rimidi.com/news/rimidi-and-lilly-collaborate-to-personalize-solutions-for-people-using-insulin">https://rimidi.com/news/rimidi-and-lilly-collaborate-to-personalize-solutions-for-people-using-insulin</a>                                                                               | 2020/8/18 |
| 55 | Rimidi            | 225 | Athenahealth          | Expansion            | To be available to athenahealth's growing network of more than 87,000 healthcare providers to deliver more efficient healthcare, improve patient quality of life, and decrease the financial burden to patients and payors. | 2017          |             | <a href="https://rimidi.com/news/rimidi-partners-with-athenahealths-more-disruption-please-program-to-transform-the-delivery-of-diabetes-care">https://rimidi.com/news/rimidi-partners-with-athenahealths-more-disruption-please-program-to-transform-the-delivery-of-diabetes-care</a>                   | 2020/8/18 |
| 60 | Johnson & Johnson | 226 | Abbott Medical Optics | M&A                  | The acquisition will include ophthalmic products in three business segments: cataract surgery, laser refractive surgery and consumer eye health.                                                                            | 2016          |             | <a href="https://www.jnj.com/media-center/press-releases/johnson-johnson-announces-agreement-to-acquire-abbott-medical-optics">https://www.jnj.com/media-center/press-releases/johnson-johnson-announces-agreement-to-acquire-abbott-medical-optics</a>                                                   | 2020/8/19 |
| 60 | Johnson & Johnson | 227 | Walgreens             | Expansion            | Centered on the shared belief that the health and well-being of families everywhere is critically important, both companies are making it easier for customers to make healthier choices.                                   | 2015          |             | <a href="https://www.jnj.com/media-center/press-releases/johnson-johnson-consumer-companies-inc-collaborates-with-walgreens-to-improve-health-outcomes">https://www.jnj.com/media-center/press-releases/johnson-johnson-consumer-companies-inc-collaborates-with-walgreens-to-improve-health-outcomes</a> | 2020/8/19 |

| #  | Company name      | #   | Partner company name | Contract style    | Purpose of contract                                                                                                                                                                                                                                                                                                                            | Year of start | Year of end | Link of press release                                                                                                                                                                                                                                                                                                                                                                                                                 | Accessed  |
|----|-------------------|-----|----------------------|-------------------|------------------------------------------------------------------------------------------------------------------------------------------------------------------------------------------------------------------------------------------------------------------------------------------------------------------------------------------------|---------------|-------------|---------------------------------------------------------------------------------------------------------------------------------------------------------------------------------------------------------------------------------------------------------------------------------------------------------------------------------------------------------------------------------------------------------------------------------------|-----------|
| 60 | Johnson & Johnson | 228 | Hanmi Pharmaceutical | R&D Collaboration | To develop and commercialize oxyntomodulin-based therapies including HM12525A, a biologic that is completing phase 1 and expected to enter phase 2 studies next year, from Hanmi Pharmaceutical Co., Ltd. The agreement is subject to clearance under the Hart-Scott-Rodino Antitrust Improvements Act and other customary closing conditions. | 2015          |             | <a href="https://www.jnj.com/media-center/press-releases/janssen-announces-global-license-and-development-rights-agreement-with-hanmi-pharmaceutical-for-novel-clinical-stage-biologic-to-treat-diabetes-and-obesity">https://www.jnj.com/media-center/press-releases/janssen-announces-global-license-and-development-rights-agreement-with-hanmi-pharmaceutical-for-novel-clinical-stage-biologic-to-treat-diabetes-and-obesity</a> | 2020/8/19 |
| 62 | GE Healthcare     | 229 | Intel                | R&D Collaboration | To market and develop home-based health technologies that will help seniors live independently and patients with chronic conditions manage their care from the comfort of their home or wherever they choose.                                                                                                                                  | 2009          |             | <a href="https://www.ge.com/news/press-releases/ge-and-intel-form-healthcare-alliance-0">https://www.ge.com/news/press-releases/ge-and-intel-form-healthcare-alliance-0</a>                                                                                                                                                                                                                                                           | 2020/8/19 |
| 62 | GE Healthcare     | 230 | M+W Group            | Expansion         | Aim at overcoming the lack of key biopharmaceuticals, especially in emerging nations.                                                                                                                                                                                                                                                          | 2011          |             | <a href="https://www.ge.com/news/press-releases/ge-healthcare-and-mw-group-form-strategic-alliance-vaccines-insulin-and">https://www.ge.com/news/press-releases/ge-healthcare-and-mw-group-form-strategic-alliance-vaccines-insulin-and</a>                                                                                                                                                                                           | 2020/8/19 |

| #  | Company name  | #   | Partner company name | Contract style    | Purpose of contract                                                                                                                                                                                                                                                              | Year of start | Year of end | Link of press release                                                                                                                                                                                                                                             | Accessed  |
|----|---------------|-----|----------------------|-------------------|----------------------------------------------------------------------------------------------------------------------------------------------------------------------------------------------------------------------------------------------------------------------------------|---------------|-------------|-------------------------------------------------------------------------------------------------------------------------------------------------------------------------------------------------------------------------------------------------------------------|-----------|
| 62 | GE Healthcare | 11  | Abbott               | M&A               | To acquire Abbott's primary in vitro diagnostics businesses and Abbott Point-of-Care diagnostics business (formerly known as i-STAT) for \$8.13 billion in cash.                                                                                                                 | 2007          |             | <a href="https://www.ge.com/news/press-releases/ge-acquire-abbotts-vitro-and-point-care-diagnostics-businesses-813-billion">https://www.ge.com/news/press-releases/ge-acquire-abbotts-vitro-and-point-care-diagnostics-businesses-813-billion</a>                 | 2020/8/19 |
| 64 | Qualcomm Life | 1   | LifeScan             | Expansion         | To streamline wireless data capture from LifeScan's OneTouch Verio Flex® blood glucose meters to physicians to enable more informed care.                                                                                                                                        | 2017          |             | <a href="https://www.qualcomm.com/news/releases/2017/06/12/qualcomm-announces-agreement-lifescan-inc-johnson-johnson-diabetes-care">https://www.qualcomm.com/news/releases/2017/06/12/qualcomm-announces-agreement-lifescan-inc-johnson-johnson-diabetes-care</a> | 2020/8/19 |
| 64 | Qualcomm Life | 205 | AMC Health           | R&D Collaboration | To accelerate the transformation of chronic care and population health management by significantly enhancing connectivity and care coordination for at-risk patients, specifically those with heart failure, hypertension, diabetes, asthma or COPD, in a cost-effective manner. | 2015          |             | <a href="https://www.qualcomm.com/news/releases/2015/03/25">https://www.qualcomm.com/news/releases/2015/03/25</a>                                                                                                                                                 | 2020/8/19 |

| #  | Company name                                           | #   | Partner company name | Contract style    | Purpose of contract                                                                                                                                                                                                                 | Year of start | Year of end | Link of press release                                                                                                                                                                                                                             | Accessed  |
|----|--------------------------------------------------------|-----|----------------------|-------------------|-------------------------------------------------------------------------------------------------------------------------------------------------------------------------------------------------------------------------------------|---------------|-------------|---------------------------------------------------------------------------------------------------------------------------------------------------------------------------------------------------------------------------------------------------|-----------|
| 64 | Qualcomm Life                                          | 227 | Walgreens            | Expansion         | To power device connectivity with Walgreens mobile and web applications and its Balance Rewards for healthy choices™ program with robust medical device connectivity and care coordination capabilities.                            | 2015          |             | <a href="https://www.qualcomm.com/news/releases/2015/01/05/qualcomm-announces-new-connected-health-collaboration-walgreens">https://www.qualcomm.com/news/releases/2015/01/05/qualcomm-announces-new-connected-health-collaboration-walgreens</a> | 2020/8/19 |
| 68 | Capital District Physicians' Health Plan, Inc. (CDPHP) | 231 | Renalytix AI         | Expansion         | To provide KidneyIntelX™ for qualified CDPHP members who have Type 2 diabetes and chronic kidney disease (diabetic kidney disease or “DKD”).                                                                                        | 2019          |             | <a href="https://www.cdphp.com/newsroom/2019/10/10-17-renalytixai-partners-cdphp-kidneyintelx">https://www.cdphp.com/newsroom/2019/10/10-17-renalytixai-partners-cdphp-kidneyintelx</a>                                                           | 2020/8/19 |
| 69 | Tidepool                                               | 13  | Insulet              | R&D Collaboration | Insulet is pleased to announce we are opening our data protocol to Tidepool to enable OmniPod users to upload their insulin pump and integrated blood glucose meter data to the Tidepool platform and future Tidepool applications. | 2014          |             | <a href="https://www.tidepool.org/blog/insulet-and-tidepool">https://www.tidepool.org/blog/insulet-and-tidepool</a>                                                                                                                               | 2020/8/19 |
| 69 | Tidepool                                               | 6   | Dexcom Inc.          | R&D Collaboration | All Tidepool applications will be able to read data from the Dexcom G4 Platinum receiver.                                                                                                                                           | 2014          |             | <a href="https://www.tidepool.org/blog/its-official-dexcom-tidepool">https://www.tidepool.org/blog/its-official-dexcom-tidepool</a>                                                                                                               | 2020/8/19 |

| #  | Company name | #   | Partner company name       | Contract style       | Purpose of contract                                                                                                                       | Year of start | Year of end | Link of press release                                                                                                                                                                                                                                                                                                                                           | Accessed  |
|----|--------------|-----|----------------------------|----------------------|-------------------------------------------------------------------------------------------------------------------------------------------|---------------|-------------|-----------------------------------------------------------------------------------------------------------------------------------------------------------------------------------------------------------------------------------------------------------------------------------------------------------------------------------------------------------------|-----------|
| 74 | BD           | 91  | JDRF                       | R&D<br>Collaboration | The collaboration expands the commitment from JDRF and BD to explore new advancements in therapy options for people with type 1 diabetes. | 2016          | 2018        | <a href="https://www.bd.com/en-us/company/news-and-media/press-releases/nov-10-2016-bd-collaborates-with-jdrf-to-focus-on-extended-wear-innovations-for-insulin-infusion-delivery">https://www.bd.com/en-us/company/news-and-media/press-releases/nov-10-2016-bd-collaborates-with-jdrf-to-focus-on-extended-wear-innovations-for-insulin-infusion-delivery</a> | 2020/8/19 |
| 76 | Sanofi       | 232 | Lexicon<br>Pharmaceuticals | R&D<br>Collaboration | The development and commercialization of sotagliflozin.                                                                                   | 2015          |             | <a href="https://www.sanofi.com/-/media/Project/One-Sanofi-Web/Websites/Global/Sanofi-COM/Home/media-room/press-releases/2015/2015-11-06-07-00-00-1684268-en.pdf">https://www.sanofi.com/-/media/Project/One-Sanofi-Web/Websites/Global/Sanofi-COM/Home/media-room/press-releases/2015/2015-11-06-07-00-00-1684268-en.pdf</a>                                   | 2020/8/19 |
| 76 | Sanofi       | 228 | Hanmi<br>Pharmaceutical    | R&D<br>Collaboration | To develop a portfolio of experimental, long-acting diabetes treatments.                                                                  | 2015          |             | <a href="https://www.sanofi.com/-/media/Project/One-Sanofi-Web/Websites/Global/Sanofi-COM/Home/media-room/press-releases/2015/2015-11-05-07-00-00-1684264-en.pdf">https://www.sanofi.com/-/media/Project/One-Sanofi-Web/Websites/Global/Sanofi-COM/Home/media-room/press-releases/2015/2015-11-05-07-00-00-1684264-en.pdf</a>                                   | 2020/8/19 |

| #  | Company name | #   | Partner company name | Contract style       | Purpose of contract                                                                                                 | Year of start | Year of end | Link of press release                                                                                                                                                                                                                                                                                                         | Accessed  |
|----|--------------|-----|----------------------|----------------------|---------------------------------------------------------------------------------------------------------------------|---------------|-------------|-------------------------------------------------------------------------------------------------------------------------------------------------------------------------------------------------------------------------------------------------------------------------------------------------------------------------------|-----------|
| 76 | Sanofi       | 233 | Evotec               | R&D<br>Collaboration | To develop beta cell-modulating diabetes treatments, which may reduce or eliminate the need for insulin injections. | 2015          |             | <a href="https://www.sanofi.com/-/media/Project/One-Sanofi-Web/Websites/Global/Sanofi-COM/Home/media-room/press-releases/2015/2015-08-07-07-00-00-1684172-en.pdf">https://www.sanofi.com/-/media/Project/One-Sanofi-Web/Websites/Global/Sanofi-COM/Home/media-room/press-releases/2015/2015-08-07-07-00-00-1684172-en.pdf</a> | 2020/8/19 |
| 83 | Voluntis     | 234 | Biocon Biologics     | R&D<br>Collaboration | To develop and distribute innovative digital therapeutics supporting people with diabetes on biologics therapy.     | 2020          |             | <a href="https://www.voluntis.com/en/news/news-1/2020/biocon-biologics-and-voluntis-join-hands-for-global-collaboration-on-digital-therapeutics-for-insuli">https://www.voluntis.com/en/news/news-1/2020/biocon-biologics-and-voluntis-join-hands-for-global-collaboration-on-digital-therapeutics-for-insuli</a>             | 2020/8/19 |

| #  | Company name | #   | Partner company name | Contract style    | Purpose of contract                                                                                                                                                                                                                                                                                                                                                                        | Year of start | Year of end | Link of press release                                                                                                                                                                                                                                                                                             | Accessed  |
|----|--------------|-----|----------------------|-------------------|--------------------------------------------------------------------------------------------------------------------------------------------------------------------------------------------------------------------------------------------------------------------------------------------------------------------------------------------------------------------------------------------|---------------|-------------|-------------------------------------------------------------------------------------------------------------------------------------------------------------------------------------------------------------------------------------------------------------------------------------------------------------------|-----------|
| 83 | Voluntis     | 235 | Salesforce           | R&D Collaboration | To automate these administrative tasks, making it seamless for providers to adopt digital therapeutics in their daily practice. Additionally, the use of AI will help identify and predict users' behaviors, supporting timely and highly personalized interactions that will contribute to extended patient engagement, improved treatment outcomes and more efficient clinic management. | 2019          |             | <a href="https://www.voluntis.com/en/news/news-1/2019/voluntis-collaborates-with-salesforce-to-introduce-full-service-platform-for-digital-therapeutics-pr">https://www.voluntis.com/en/news/news-1/2019/voluntis-collaborates-with-salesforce-to-introduce-full-service-platform-for-digital-therapeutics-pr</a> | 2020/8/19 |
| 83 | Voluntis     | 236 | AbbVie               | R&D Collaboration | To enhance patient care coordination in immunology with innovative digital therapeutic software. Together the companies will leverage Voluntis' proven Theraxium technology to make this new solution available to patients and providers in the United States.                                                                                                                            | 2018          |             | <a href="https://www.voluntis.com/en/news/news-1/2018/abbvie-and-voluntis-to-develop-companion-digital-therapeutics">https://www.voluntis.com/en/news/news-1/2018/abbvie-and-voluntis-to-develop-companion-digital-therapeutics</a>                                                                               | 2020/8/19 |

| #  | Company name | #   | Partner company name | Contract style    | Purpose of contract                                                                                                                                                                                         | Year of start | Year of end | Link of press release                                                                                                                                                           | Accessed  |
|----|--------------|-----|----------------------|-------------------|-------------------------------------------------------------------------------------------------------------------------------------------------------------------------------------------------------------|---------------|-------------|---------------------------------------------------------------------------------------------------------------------------------------------------------------------------------|-----------|
| 83 | Voluntis     | 237 | Akili Interactive    | R&D Collaboration | To broaden the understanding, adoption, and integration of digital therapeutic solutions into mainstream healthcare through education, advocacy, and research.                                              | 2017          |             | <a href="https://www.voluntis.com/en/news/news-1/2017/digital-therapeutics-alliance">https://www.voluntis.com/en/news/news-1/2017/digital-therapeutics-alliance</a>             | 2020/8/19 |
| 83 | Voluntis     | 238 | Propeller Health     | R&D Collaboration | To broaden the understanding, adoption, and integration of digital therapeutic solutions into mainstream healthcare through education, advocacy, and research.                                              | 2017          |             | <a href="https://www.voluntis.com/en/news/news-1/2017/digital-therapeutics-alliance">https://www.voluntis.com/en/news/news-1/2017/digital-therapeutics-alliance</a>             | 2020/8/19 |
| 83 | Voluntis     | 29  | Welldoc              | R&D Collaboration | To broaden the understanding, adoption, and integration of digital therapeutic solutions into mainstream healthcare through education, advocacy, and research.                                              | 2017          |             | <a href="https://www.voluntis.com/en/news/news-1/2017/digital-therapeutics-alliance">https://www.voluntis.com/en/news/news-1/2017/digital-therapeutics-alliance</a>             | 2020/8/19 |
| 83 | Voluntis     | 76  | Sanofi               | Expansion         | To deliver digital insulin titration solutions, featuring a mobile phone application designed to help improve decision-making and self-management of type 2 diabetes for people treated with basal insulin. | 2017          |             | <a href="https://www.voluntis.com/en/news/news-1/2017/sanofi-voluntis-global-alliance-t2d">https://www.voluntis.com/en/news/news-1/2017/sanofi-voluntis-global-alliance-t2d</a> | 2020/8/19 |

| #   | Company name                          | #   | Partner company name | Contract style       | Purpose of contract                                                                                                                                                                                                     | Year of start | Year of end | Link of press release                                                                                                                                                                                                                                                                                                                                                                                       | Accessed  |
|-----|---------------------------------------|-----|----------------------|----------------------|-------------------------------------------------------------------------------------------------------------------------------------------------------------------------------------------------------------------------|---------------|-------------|-------------------------------------------------------------------------------------------------------------------------------------------------------------------------------------------------------------------------------------------------------------------------------------------------------------------------------------------------------------------------------------------------------------|-----------|
| 83  | Voluntis                              | 18  | Livongo              | Expansion            | To improve medication adherence and optimization by offering better information personalized to Livongo members.                                                                                                        | 2017          |             | <a href="https://www.voluntis.com/en/news/news-1/2017/voluntis-and-livongo-partner-to-deliver-insulin-titration-app">https://www.voluntis.com/en/news/news-1/2017/voluntis-and-livongo-partner-to-deliver-insulin-titration-app</a>                                                                                                                                                                         | 2020/8/19 |
| 86  | Australasian Medical & Scientific Ltd | 102 | MannKind             | Commercial agreement | The exclusive partnership is set to benefit Australian diabetes patients by offering a new innovative technology solution to their diabetes management.                                                                 | 2019          |             | <a href="https://www.amsl.com.au/newsandevents/amsl-diabetes-partner-with-mannkind-corporation/">https://www.amsl.com.au/newsandevents/amsl-diabetes-partner-with-mannkind-corporation/</a>                                                                                                                                                                                                                 | 2020/8/19 |
| 86  | Australasian Medical & Scientific Ltd | 206 | Valeritas            | Commercial agreement | AMSL Diabetes will have the rights to promote, market and sell certain Valeritas products to diabetes clinics and patients in Australia.                                                                                | 2018          |             | <a href="https://www.amsl.com.au/newsandevents/1010/amsl-signs-exclusive-distribution-agreement-with-valeritas-holdings-inc/">https://www.amsl.com.au/newsandevents/1010/amsl-signs-exclusive-distribution-agreement-with-valeritas-holdings-inc/</a>                                                                                                                                                       | 2020/8/19 |
| 100 | John Hancock                          | 183 | Onduo                | Expansion            | John Hancock announced John Hancock Aspire™ with Vitality, the first of its kind life insurance designed specifically for Americans living with diabetes, in collaboration with Verily, an Alphabet company, and Onduo. | 2019          |             | <a href="https://www.prnewswire.com/news-releases/john-hancock-verily-and-onduo-launch-john-hancock-aspire-the-first-life-insurance-solution-designed-for-americans-living-with-diabetes-300946597.html">https://www.prnewswire.com/news-releases/john-hancock-verily-and-onduo-launch-john-hancock-aspire-the-first-life-insurance-solution-designed-for-americans-living-with-diabetes-300946597.html</a> | 2020/8/19 |

| #   | Company name      | #   | Partner company name | Contract style    | Purpose of contract                                                                                                                                                                                                                              | Year of start | Year of end | Link of press release                                                                                                                                                                                                                                                                                                                                         | Accessed  |
|-----|-------------------|-----|----------------------|-------------------|--------------------------------------------------------------------------------------------------------------------------------------------------------------------------------------------------------------------------------------------------|---------------|-------------|---------------------------------------------------------------------------------------------------------------------------------------------------------------------------------------------------------------------------------------------------------------------------------------------------------------------------------------------------------------|-----------|
| 101 | Companion Medical | 55  | Rimidi               | R&D Collaboration | To enable clinicians to analyze real-time insulin dosage integrated with data from connected glucometers and Continuous Glucose Monitors (CGMs) to remotely refine dosing decisions, all while working within the existing clinical workflow.    | 2019          |             | <a href="https://www.prweb.com/releases/rimidi_and_companion_medical_announce_first_u_s_partnership_to_bring_connected_insulin_data_into_the_clinical_workflow/prweb16354107.htm">https://www.prweb.com/releases/rimidi_and_companion_medical_announce_first_u_s_partnership_to_bring_connected_insulin_data_into_the_clinical_workflow/prweb16354107.htm</a> | 2020/8/19 |
| 107 | Eli Lilly         | 239 | Evidation            | R&D Collaboration | To have access to Evidation's data platform with the goal of uncovering new ways to measure and understand a patient's health by accessing consented data derived from smartphones, connected sensors, wearables, and even his or her own voice. | 2018          |             | <a href="http://lilly.mediaroom.com/index.php?s=9042&amp;item=137852">http://lilly.mediaroom.com/index.php?s=9042&amp;item=137852</a>                                                                                                                                                                                                                         | 2020/8/19 |
| 107 | Eli Lilly         | 18  | Livongo              | R&D Collaboration | To combine real-world behavioral studies and claims data to advance knowledge about effective interventions in diabetes care.                                                                                                                    | 2018          |             | <a href="http://lilly.mediaroom.com/2018-01-08-Livongo-and-Lilly-Collaborate-on-Real-World-Diabetes-Research">http://lilly.mediaroom.com/2018-01-08-Livongo-and-Lilly-Collaborate-on-Real-World-Diabetes-Research</a>                                                                                                                                         | 2020/8/19 |

| #   | Company name | #   | Partner company name | Contract style    | Purpose of contract                                                                                                                                                                                                       | Year of start | Year of end | Link of press release                                                                                                                                                                                                                                                       | Accessed  |
|-----|--------------|-----|----------------------|-------------------|---------------------------------------------------------------------------------------------------------------------------------------------------------------------------------------------------------------------------|---------------|-------------|-----------------------------------------------------------------------------------------------------------------------------------------------------------------------------------------------------------------------------------------------------------------------------|-----------|
| 107 | Eli Lilly    | 240 | Boehringer Ingelheim | R&D Collaboration | To focus its combined expertise and investment on the continued development and commercialisation of Jardiance® (empagliflozin) in type 2 diabetes, heart failure, and chronic kidney disease.                            | 2019          |             | <a href="http://lilly.mediaroom.com/2019-11-04-Boehringer-Ingelheim-and-Lilly-modernise-alliance-to-focus-full-expertise-on-Jardiance-R">http://lilly.mediaroom.com/2019-11-04-Boehringer-Ingelheim-and-Lilly-modernise-alliance-to-focus-full-expertise-on-Jardiance-R</a> | 2020/8/19 |
| 125 | Ypsomed      | 6   | Dexcom Inc.          | R&D Collaboration | The partnership is an important milestone in the further development of individualised diabetes therapy. In a first step, CGM data from Dexcom will be integrated into the mylife App from Ypsomed.                       | 2020          |             | <a href="https://www.ypsomed.com/en/media/details/ypsomed-and-dexcom-enter-into-partnership-to-drive-closed-loop-system.html">https://www.ypsomed.com/en/media/details/ypsomed-and-dexcom-enter-into-partnership-to-drive-closed-loop-system.html</a>                       | 2020/8/19 |
| 125 | Ypsomed      | 37  | Glooko               | R&D Collaboration | With the goal of freedom of choice for the users of the mylife YpsoPump, the first study on the insulin pump with open interfaces as well as the connection to the therapy management solution diasend® by Glooko starts. | 2019          |             | <a href="https://www.ypsomed.com/en/media/details/ypsomed-enters-new-partnerships-in-diabetes-therapy.html">https://www.ypsomed.com/en/media/details/ypsomed-enters-new-partnerships-in-diabetes-therapy.html</a>                                                           | 2020/8/19 |

| #   | Company name | #   | Partner company name | Contract style      | Purpose of contract                                                                                                                                                                                                                                                                                 | Year of start | Year of end | Link of press release                                                                                                                                                                                                                                                                                                                                                 | Accessed  |
|-----|--------------|-----|----------------------|---------------------|-----------------------------------------------------------------------------------------------------------------------------------------------------------------------------------------------------------------------------------------------------------------------------------------------------|---------------|-------------|-----------------------------------------------------------------------------------------------------------------------------------------------------------------------------------------------------------------------------------------------------------------------------------------------------------------------------------------------------------------------|-----------|
| 125 | Ypsomed      | 247 | Philips              | R&D Collaboration   | To jointly develop and deploy new digital self-medication adherence monitoring services based on Ypsomed's connected devices and Philips' cloud-based HealthSuite Digital Platform.                                                                                                                 | 2018          |             | <a href="https://www.ypsomed.com/en/media/details/ypsomed-teams-up-with-philips-for-the-development-of-its-new-digital-services-to-simplify-medication-adherence-monitoring-191.html">https://www.ypsomed.com/en/media/details/ypsomed-teams-up-with-philips-for-the-development-of-its-new-digital-services-to-simplify-medication-adherence-monitoring-191.html</a> | 2020/8/19 |
| 125 | Ypsomed      | 91  | JDRF                 | Financial agreement | The objective of the project is the development and regulatory approval of the next-generation mylife™ YpsoPump® insulin pump supporting incorporation into an automated insulin delivery (AID) system via open-protocol communication with third-party smartphone-based apps and/or other devices. | 2018          | 2020        | <a href="https://www.ypsomed.com/en/media/details/ypsomed-partners-with-jdrf-to-develop-new-open-technologies-for-next-generation-automated-insulin-delivery-aid-systems.html">https://www.ypsomed.com/en/media/details/ypsomed-partners-with-jdrf-to-develop-new-open-technologies-for-next-generation-automated-insulin-delivery-aid-systems.html</a>               | 2020/8/19 |
| 125 | Ypsomed      | 12  | Novo Nordisk         | R&D Collaboration   | To deliver innovative care solutions, that improve the lives of people with diabetes                                                                                                                                                                                                                | 2016          |             | <a href="https://www.ypsomed.com/en/media/details/ypsomed-collaborates-with-novo-nordisk-to-provide-new-solutions-in-insulin-pump-therapy.html">https://www.ypsomed.com/en/media/details/ypsomed-collaborates-with-novo-nordisk-to-provide-new-solutions-in-insulin-pump-therapy.html</a>                                                                             | 2020/8/19 |

| #   | Company name | #   | Partner company name           | Contract style       | Purpose of contract                                                                                                                                                                                        | Year of start | Year of end | Link of press release                                                                                                                                                                                                                             | Accessed  |
|-----|--------------|-----|--------------------------------|----------------------|------------------------------------------------------------------------------------------------------------------------------------------------------------------------------------------------------------|---------------|-------------|---------------------------------------------------------------------------------------------------------------------------------------------------------------------------------------------------------------------------------------------------|-----------|
| 125 | Ypsomed      | 248 | Tonghua Dongbao Pharmaceutical | Commercial agreement | Dongbao will also be distributing the mylife™ Clickfine® pen needles exclusively in China and continuously expand their sales channels in the retail area.                                                 | 2016          |             | <a href="https://www.ypsomed.com/en/media/details/ypsomed-intensifies-partnership-with-tonghua-dongbao-pharmaceutical.html">https://www.ypsomed.com/en/media/details/ypsomed-intensifies-partnership-with-tonghua-dongbao-pharmaceutical.html</a> | 2020/8/19 |
| 125 | Ypsomed      | 249 | Terumo                         | R&D Collaboration    | To supplement its own range of products, the multi-billion dollar group additionally plans to offer its customers the option of a compatible autoinjector into which the PLAJEXTM syringes are integrated. | 2014          |             | <a href="https://www.ypsomed.com/en/media/details/ypsomed-and-terumo-corporation-agree-on-collaboration.html">https://www.ypsomed.com/en/media/details/ypsomed-and-terumo-corporation-agree-on-collaboration.html</a>                             | 2020/8/19 |
| 125 | Ypsomed      | 250 | AstraZeneca                    | R&D Collaboration    | AstraZeneca, one of the largest biopharmaceutical companies in the world, will use an Ypsomed injection system for subcutaneous administration of its diabetes drug Bydureon®.                             | 2014          |             | <a href="https://www.ypsomed.com/en/media/details/ypsomed-newly-supplies-astrazeneca-with-the-bydureon-pen.html">https://www.ypsomed.com/en/media/details/ypsomed-newly-supplies-astrazeneca-with-the-bydureon-pen.html</a>                       | 2020/8/19 |

| #   | Company name    | #   | Partner company name     | Contract style       | Purpose of contract                                                                                                                                                                                                                                                                                                              | Year of start | Year of end | Link of press release                                                                                                                                                                                                                                                                                                                                           | Accessed  |
|-----|-----------------|-----|--------------------------|----------------------|----------------------------------------------------------------------------------------------------------------------------------------------------------------------------------------------------------------------------------------------------------------------------------------------------------------------------------|---------------|-------------|-----------------------------------------------------------------------------------------------------------------------------------------------------------------------------------------------------------------------------------------------------------------------------------------------------------------------------------------------------------------|-----------|
| 125 | Ypsomed         | 251 | Cilag GmbH International | Patent cross-license | To use certain patents, which protect inventions of Ypsomed, for an auto-injector device for the administration of two biopharmaceutical products with an option to extend the licence for a number of other compounds.                                                                                                          | 2007          |             | <a href="https://www.ypsomed.com/en/media/details/ypsomed-concludes-licence-agreement-on-own-auto-injector-patents-with-cilag-gmbh-international.html">https://www.ypsomed.com/en/media/details/ypsomed-concludes-licence-agreement-on-own-auto-injector-patents-with-cilag-gmbh-international.html</a>                                                         | 2020/8/19 |
| 126 | GlaxoSmithKline | 27  | Verily                   | M&A                  | The new company will bring together GSK's world class drug discovery and development expertise and deep understanding of disease biology with Verily's world leading technical expertise in the miniaturisation of low power electronics, device development, data analytics and software development for clinical applications. | 2016          |             | <a href="https://www.gsk.com/en-gb/media/press-releases/gsk-and-verily-to-establish-galvani-bioelectronics-a-new-company-dedicated-to-the-development-of-bioelectronic-medicines/">https://www.gsk.com/en-gb/media/press-releases/gsk-and-verily-to-establish-galvani-bioelectronics-a-new-company-dedicated-to-the-development-of-bioelectronic-medicines/</a> | 2020/8/19 |
| 174 | Topcon          | 241 | IDx                      | Commercial agreement | An exclusivity agreement that will allow the companies to scale delivery of AI-based diagnostic solutions in the U.S. market.                                                                                                                                                                                                    | 2018          |             | <a href="https://www.prnewswire.com/news-releases/idx-and-topcon-sign-exclusive-ai-platform-agreement-for-the-us-market-300734696.html">https://www.prnewswire.com/news-releases/idx-and-topcon-sign-exclusive-ai-platform-agreement-for-the-us-market-300734696.html</a>                                                                                       | 2020/8/19 |

| #   | Company name | #   | Partner company name       | Contract style | Purpose of contract                                                                                                                                                                       | Year of start | Year of end | Link of press release                                                                                                                                                                                                                                                                                                                                                           | Accessed  |
|-----|--------------|-----|----------------------------|----------------|-------------------------------------------------------------------------------------------------------------------------------------------------------------------------------------------|---------------|-------------|---------------------------------------------------------------------------------------------------------------------------------------------------------------------------------------------------------------------------------------------------------------------------------------------------------------------------------------------------------------------------------|-----------|
| 183 | Onduo        | 242 | Hidrate                    | Expansion      | To provide access to innovative technology tools and products that promote positive behavior and develop healthy changes that fit into the daily routines of their members and consumers. | 2019          |             | <a href="https://www.businesswire.com/news/home/20191119005282/en/Onduo-Hidrate-Team-Expand-Smart-Devices-Develop">https://www.businesswire.com/news/home/20191119005282/en/Onduo-Hidrate-Team-Expand-Smart-Devices-Develop</a>                                                                                                                                                 | 2020/8/19 |
| 183 | Onduo        | 243 | Telcare                    | Expansion      | Telcare will serve as the supplier of remote blood glucose systems and the resulting data for patients enrolled in Onduo's groundbreaking diabetes management program.                    | 2017          |             | <a href="https://www.globenewswire.com/news-release/2017/11/27/1206566/0/en/Telcare-a-Division-of-BioTelemetry-Inc-Announces-Collaboration-with-Onduo-in-Diabetes-Management-Program.html">https://www.globenewswire.com/news-release/2017/11/27/1206566/0/en/Telcare-a-Division-of-BioTelemetry-Inc-Announces-Collaboration-with-Onduo-in-Diabetes-Management-Program.html</a> | 2020/8/19 |
| 183 | Onduo        | 70  | Blue Cross and Blue Shield | Expansion      | pilot program that will provide eligible members with access to personalized and convenient diabetes care.                                                                                | 2017          |             | <a href="https://www.prnewswire.com/news-releases/blue-cross-and-blue-shield-companies-partner-with-onduo-on-three-state-pilot-programs-to-address-diabetes-300557782.html">https://www.prnewswire.com/news-releases/blue-cross-and-blue-shield-companies-partner-with-onduo-on-three-state-pilot-programs-to-address-diabetes-300557782.html</a>                               | 2020/8/19 |

| #   | Company name   | #   | Partner company name | Contract style    | Purpose of contract                                                                                                                                                                                                                                                     | Year of start | Year of end | Link of press release                                                                                                                                                                                                                                                                                                                         | Accessed  |
|-----|----------------|-----|----------------------|-------------------|-------------------------------------------------------------------------------------------------------------------------------------------------------------------------------------------------------------------------------------------------------------------------|---------------|-------------|-----------------------------------------------------------------------------------------------------------------------------------------------------------------------------------------------------------------------------------------------------------------------------------------------------------------------------------------------|-----------|
| 200 | Redox          | 244 | pCare                | R&D Collaboration | To allow healthcare organizations to quickly and simply integrate pCare's patient experience solution, assuring seamless, secure data exchange within an organization's existing ecosystem of data-driven tools and HIT systems, like electronic health records (EHRs). | 2019          |             | <a href="https://www.prnewswire.com/news-releases/pcare-partners-with-redox-to-enhance-health-data-integration-300951226.html">https://www.prnewswire.com/news-releases/pcare-partners-with-redox-to-enhance-health-data-integration-300951226.html</a>                                                                                       | 2020/8/19 |
| 206 | Valeritas      | 245 | Zealand Pharma       | M&A               | The acquisition transforms Zealand into a fully-integrated biotech company with an established footprint in the U.S. diabetes market.                                                                                                                                   | 2020          |             | <a href="https://www.globenewswire.com/news-release/2020/04/02/2010773/0/en/Zealand-Pharma-completes-the-acquisition-of-Valeritas.html">https://www.globenewswire.com/news-release/2020/04/02/2010773/0/en/Zealand-Pharma-completes-the-acquisition-of-Valeritas.html</a>                                                                     | 2020/8/19 |
| 216 | CareConnectors | 246 | Valued Relationships | R&D Collaboration | They are developing a new software framework that will provide mobile health application developers with a unified, validated, monitoring data sharing and exchange interface for home telehealth monitoring.                                                           | 2014          |             | <a href="https://www.prnewswire.com/news-releases/careconnectors-and-vri-use-patientgraph-platform-to-develop-mobile-application-framework-for-developers-274443501.html">https://www.prnewswire.com/news-releases/careconnectors-and-vri-use-patientgraph-platform-to-develop-mobile-application-framework-for-developers-274443501.html</a> | 2020/8/19 |

| #   | Company name | #   | Partner company name | Contract style    | Purpose of contract                                                                                                                                                                                                                                                        | Year of start | Year of end | Link of press release                                                                                                                                                                                                                                       | Accessed  |
|-----|--------------|-----|----------------------|-------------------|----------------------------------------------------------------------------------------------------------------------------------------------------------------------------------------------------------------------------------------------------------------------------|---------------|-------------|-------------------------------------------------------------------------------------------------------------------------------------------------------------------------------------------------------------------------------------------------------------|-----------|
| 235 | Salesforce   | 247 | Philips              | R&D Collaboration | To deliver an open, cloud-based healthcare platform, leveraging Philips' leading positions in medical technology, clinical applications and clinical informatics and salesforce.com's leadership in enterprise cloud computing, innovation and customer engagement.        | 2014          |             | <a href="https://www.salesforce.com/company/news-press/press-releases/2014/06/140626/">https://www.salesforce.com/company/news-press/press-releases/2014/06/140626/</a>                                                                                     | 2020/8/19 |
| 239 | Evidation    | 69  | Tidepool             | R&D Collaboration | The research is novel in that connected devices — including Dexcom continuous glucose monitors, an Emfit sleep monitor, and a WHOOP activity tracker — will allow researchers to access data about overnight low blood sugar events that previously hasn't been available. | 2018          |             | <a href="https://www.mobihealthnews.com/content/evidation-health-tidepool-use-connected-devices-study-sleep-and-type-1-diabetes">https://www.mobihealthnews.com/content/evidation-health-tidepool-use-connected-devices-study-sleep-and-type-1-diabetes</a> | 2020/8/19 |
| 239 | Evidation    | 76  | Sanofi               | R&D Collaboration | To work together over the next three years to use Evidation's Real Life study platform to help increase Sanofi's understanding of the daily burden of disease, and develop solutions that help improve outcomes.                                                           | 2017          | 2020        | <a href="https://www.mobihealthnews.com/content/sanofi-and-evidation-health-work-together-understand-treat-disease">https://www.mobihealthnews.com/content/sanofi-and-evidation-health-work-together-understand-treat-disease</a>                           | 2020/8/19 |

| #   | Company name            | #   | Partner company name | Contract style          | Purpose of contract                                                                                                                                                                                                                                                       | Year of start | Year of end | Link of press release                                                                                                                                                                                                                                                                                                                                                                                                                                       | Accessed  |
|-----|-------------------------|-----|----------------------|-------------------------|---------------------------------------------------------------------------------------------------------------------------------------------------------------------------------------------------------------------------------------------------------------------------|---------------|-------------|-------------------------------------------------------------------------------------------------------------------------------------------------------------------------------------------------------------------------------------------------------------------------------------------------------------------------------------------------------------------------------------------------------------------------------------------------------------|-----------|
| 240 | Boehringer<br>Ingelheim | 252 | PharmAccess          | Expansion               | Tiba Yako seeks to support care for patients in Nairobi, Kiambu and Vihiga County through screening sessions, clinical care and home-based monitoring as well as digital awareness and adherence advice. The mobile phone is the linking pin in this integrated approach. | 2019          |             | <a href="https://www.boehringer-ingelheim.com/press-release/boehringer-ingelheimpharmaccesslaunchdigitalhealthcareprogram?">https://www.boehringer-ingelheim.com/press-release/boehringer-ingelheimpharmaccesslaunchdigitalhealthcareprogram?</a>                                                                                                                                                                                                           | 2020/8/19 |
| 240 | Boehringer<br>Ingelheim | 253 | Gubra                | R&D<br>Collaboration    |                                                                                                                                                                                                                                                                           | 2019          |             | <a href="https://www.boehringer-ingelheim.com/press-release/new-collaboration-gubra-obesity-treatment?">https://www.boehringer-ingelheim.com/press-release/new-collaboration-gubra-obesity-treatment?</a>                                                                                                                                                                                                                                                   | 2020/8/19 |
| 247 | Philips                 | 40  | Validic              | R&D<br>Collaboration    | Philips teams up with Validic to integrate personal health data from third-party devices and apps into connected health services                                                                                                                                          | 2016          |             | <a href="https://www.philips.com/a-w/about/news/archive/standard/news/press/2016/20160203-Philips-teams-up-with-Validic-to-integrate-personal-health-data-from-third-party-devices-and-apps-into-connected-health-services.html">https://www.philips.com/a-w/about/news/archive/standard/news/press/2016/20160203-Philips-teams-up-with-Validic-to-integrate-personal-health-data-from-third-party-devices-and-apps-into-connected-health-services.html</a> | 2020/8/19 |
| 249 | Terumo                  | 6   | Dexcom Inc.          | Commercial<br>agreement | U. S.-based DexCom, Inc., manufactured the product and Terumo has the right to distribute it exclusively in Japan.                                                                                                                                                        | 2019          |             | <a href="https://www.terumo.com/pressrelease/detail/20190228/166/index.html">https://www.terumo.com/pressrelease/detail/20190228/166/index.html</a>                                                                                                                                                                                                                                                                                                         | 2020/8/19 |

| #   | Company name | #   | Partner company name | Contract style      | Purpose of contract                                                                                                                                                                                                             | Year of start | Year of end | Link of press release                                                                                                                                                                                                                                                   | Accessed  |
|-----|--------------|-----|----------------------|---------------------|---------------------------------------------------------------------------------------------------------------------------------------------------------------------------------------------------------------------------------|---------------|-------------|-------------------------------------------------------------------------------------------------------------------------------------------------------------------------------------------------------------------------------------------------------------------------|-----------|
| 252 | PharmAccess  | 76  | Sanofi               | Expansion           | Ngao Ya Afya aims to facilitate access to better diabetes and hypertension care in Kenya through a low cost, mobile technology enabled model.                                                                                   | 2018          |             | <a href="https://businessafricaonline.com/pharmaccess-sanofi-and-carepay-partner-to-digitize-diabetes-and-hypertension-care-in-kenya/">https://businessafricaonline.com/pharmaccess-sanofi-and-carepay-partner-to-digitize-diabetes-and-hypertension-care-in-kenya/</a> | 2020/8/19 |
| 252 | PharmAccess  | 254 | CarePay              | Expansion           | Ngao Ya Afya aims to facilitate access to better diabetes and hypertension care in Kenya through a low cost, mobile technology enabled model.                                                                                   | 2018          |             | <a href="https://businessafricaonline.com/pharmaccess-sanofi-and-carepay-partner-to-digitize-diabetes-and-hypertension-care-in-kenya/">https://businessafricaonline.com/pharmaccess-sanofi-and-carepay-partner-to-digitize-diabetes-and-hypertension-care-in-kenya/</a> | 2020/8/19 |
| 253 | Gubra        | 91  | JDRF                 | Financial agreement | Gubra approach is based on a novel, and unique concept that differs fundamentally from other glucose sensing insulin approaches and the JDRF funding commitment will help accelerate the program to its next development stage. | 2018          |             | <a href="https://www.gubra.dk/jdrf-and-gubra-join-forces-to-develop-a-new-glucose-responsive-insulin-for-diabetes/">https://www.gubra.dk/jdrf-and-gubra-join-forces-to-develop-a-new-glucose-responsive-insulin-for-diabetes/</a>                                       | 2020/8/19 |

| #   | Company name | #  | Partner company name | Contract style         | Purpose of contract                                                                                                                                                                                                                                                    | Year of start | Year of end | Link of press release                                                                                                                                                                                                                                                                                                                     | Accessed  |
|-----|--------------|----|----------------------|------------------------|------------------------------------------------------------------------------------------------------------------------------------------------------------------------------------------------------------------------------------------------------------------------|---------------|-------------|-------------------------------------------------------------------------------------------------------------------------------------------------------------------------------------------------------------------------------------------------------------------------------------------------------------------------------------------|-----------|
| 253 | Gubra        | 76 | Sanofi               | R&D Collaboration      | Gubra today announced the launch of a new research collaboration agreement with Sanofi focusing on the discovery of gut peptides in order to identify novel targets suitable for development of peptide-based drugs for treatment of people with diabetes and obesity. | 2013          |             | <a href="https://www.gubra.dk/gubra-announces-research-collaboration-agreement-with-sanofi-to-discover-and-develop-peptide-based-drugs-targeting-diabetes-and-obesity/">https://www.gubra.dk/gubra-announces-research-collaboration-agreement-with-sanofi-to-discover-and-develop-peptide-based-drugs-targeting-diabetes-and-obesity/</a> | 2020/8/19 |
| 255 | FDA          | 38 | Apple                | Pre-Cert Pilot Program | To foster innovation of digital health products                                                                                                                                                                                                                        | 2017          |             | <a href="https://www.fda.gov/medical-devices/digital-health-center-excellence/digital-health-software-precertification-pre-cert-program">https://www.fda.gov/medical-devices/digital-health-center-excellence/digital-health-software-precertification-pre-cert-program</a>                                                               | 2020/12/5 |
| 255 | FDA          | 23 | fitbit               | Pre-Cert Pilot Program | To foster innovation of digital health products                                                                                                                                                                                                                        | 2017          |             | <a href="https://www.fda.gov/medical-devices/digital-health-center-excellence/digital-health-software-precertification-pre-cert-program">https://www.fda.gov/medical-devices/digital-health-center-excellence/digital-health-software-precertification-pre-cert-program</a>                                                               | 2020/12/5 |
| 255 | FDA          | 60 | Johnson & Johnson    | Pre-Cert Pilot Program | To foster innovation of digital health products                                                                                                                                                                                                                        | 2017          |             | <a href="https://www.fda.gov/medical-devices/digital-health-center-excellence/digital-health-software-precertification-pre-cert-program">https://www.fda.gov/medical-devices/digital-health-center-excellence/digital-health-software-precertification-pre-cert-program</a>                                                               | 2020/12/5 |

| #   | Company name | #  | Partner company name | Contract style         | Purpose of contract                             | Year of start | Year of end | Link of press release                                                                                                                                                                                                                                                       | Accessed  |
|-----|--------------|----|----------------------|------------------------|-------------------------------------------------|---------------|-------------|-----------------------------------------------------------------------------------------------------------------------------------------------------------------------------------------------------------------------------------------------------------------------------|-----------|
| 255 | FDA          | 2  | Hoffmann-La Roche    | Pre-Cert Pilot Program | To foster innovation of digital health products | 2017          |             | <a href="https://www.fda.gov/medical-devices/digital-health-center-excellence/digital-health-software-precertification-pre-cert-program">https://www.fda.gov/medical-devices/digital-health-center-excellence/digital-health-software-precertification-pre-cert-program</a> | 2020/12/5 |
| 255 | FDA          | 25 | Samsung              | Pre-Cert Pilot Program | To foster innovation of digital health products | 2017          |             | <a href="https://www.fda.gov/medical-devices/digital-health-center-excellence/digital-health-software-precertification-pre-cert-program">https://www.fda.gov/medical-devices/digital-health-center-excellence/digital-health-software-precertification-pre-cert-program</a> | 2020/12/5 |
| 255 | FDA          | 69 | Tidepool             | Pre-Cert Pilot Program | To foster innovation of digital health products | 2017          |             | <a href="https://www.fda.gov/medical-devices/digital-health-center-excellence/digital-health-software-precertification-pre-cert-program">https://www.fda.gov/medical-devices/digital-health-center-excellence/digital-health-software-precertification-pre-cert-program</a> | 2020/12/5 |
| 255 | FDA          | 27 | Verily               | Pre-Cert Pilot Program | To foster innovation of digital health products | 2017          |             | <a href="https://www.fda.gov/medical-devices/digital-health-center-excellence/digital-health-software-precertification-pre-cert-program">https://www.fda.gov/medical-devices/digital-health-center-excellence/digital-health-software-precertification-pre-cert-program</a> | 2020/12/5 |
